# Supplementary material for: Modulation of activation-associated host cell gene expression by the apicomplexan parasite Theileria annulata
Source: PubMed Central journal article supplement (PMC3532605; doi:10.1111/j.1462-5822.2012.01809.x), 2012-05-23
Supplement: cmi0014-1434-SD1.pdf [file cmi0014-1434-SD1.pdf]

**Supplementary data figure 1. Immunofluorescence analysis of activated BL20 cells in response to LPS stimulation**

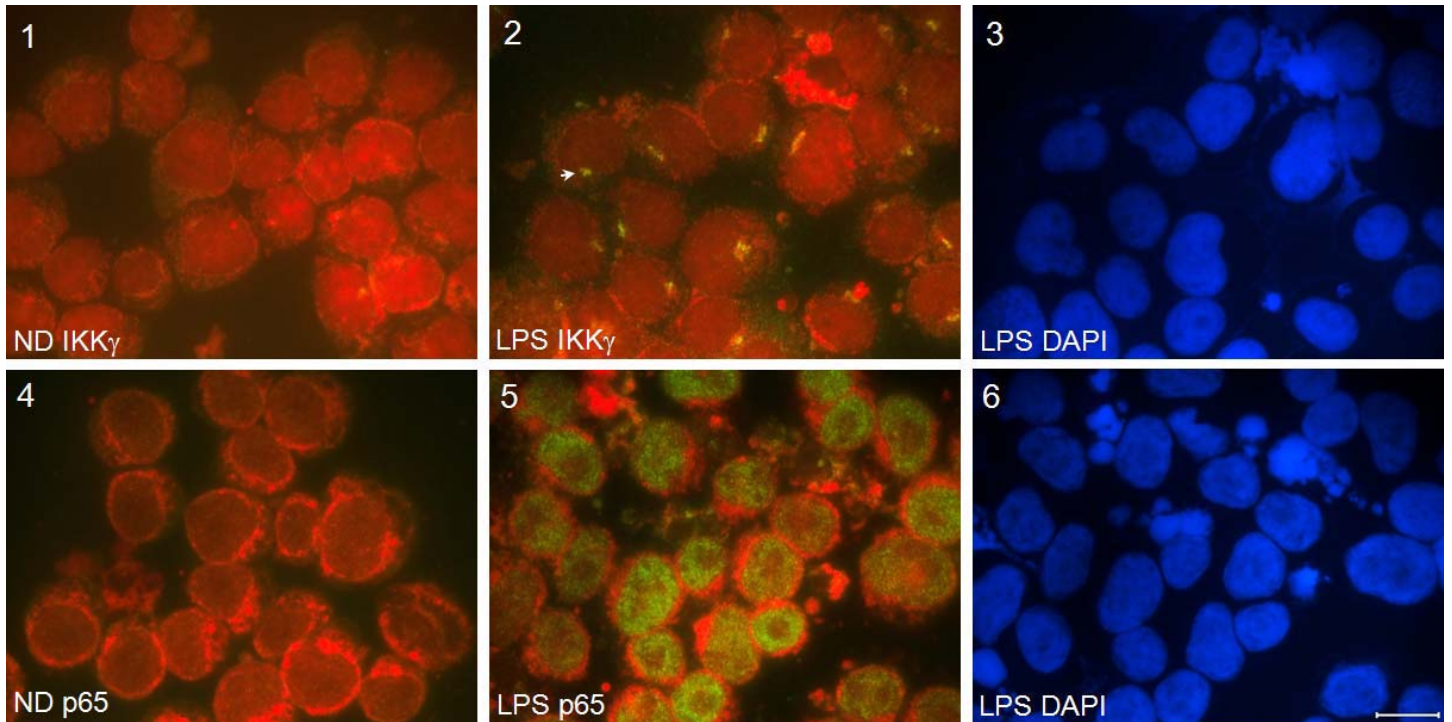

**Panels 1-3:** IKK signalosomes were detected in BL20 and LPS stimulated BL20 using a monoclonal anti-IKK $\gamma$  antibody. IKK signalosomes (green dots) were observed only in BL20 LPS. DAPI nuclear-staining is shown in panel 3. The arrow denotes a cluster of IKK signalosomes.

**Panels 4-6:** NF $\kappa$ B was detected in BL20 and LPS stimulated BL20 using anti-p65 antibody. Elevated expression and nuclear localisation of NF $\kappa$ B was observed in BL20 LPS. DAPI nuclear-staining is shown in panel 6. Bar = 15  $\mu$ m.

Supplementary data figure 2. Panel of qRT-PCR results

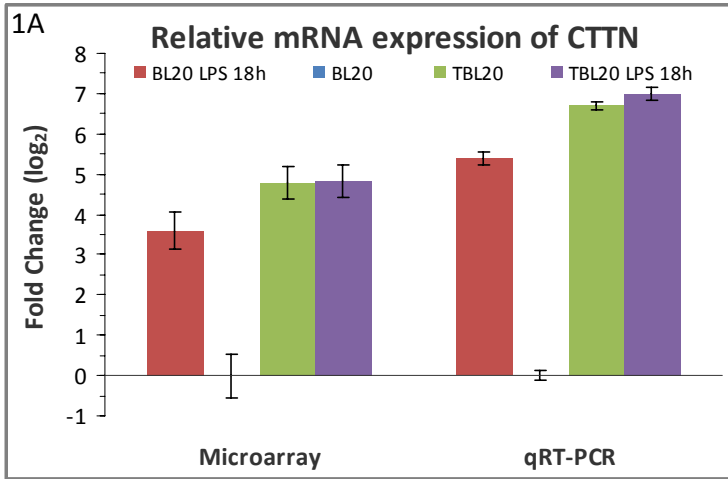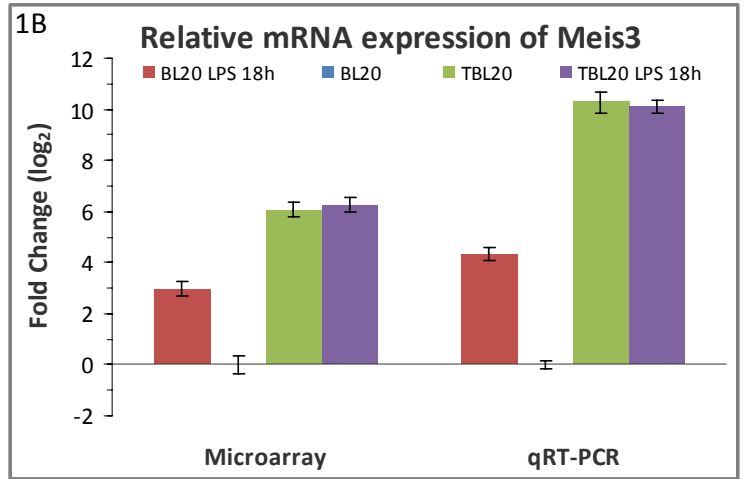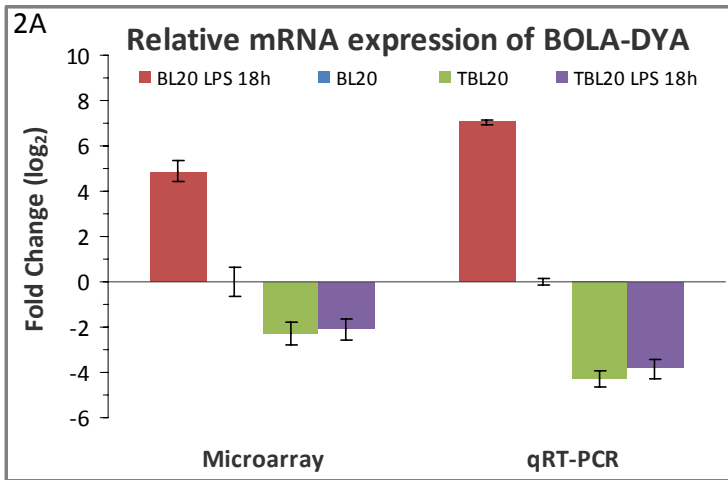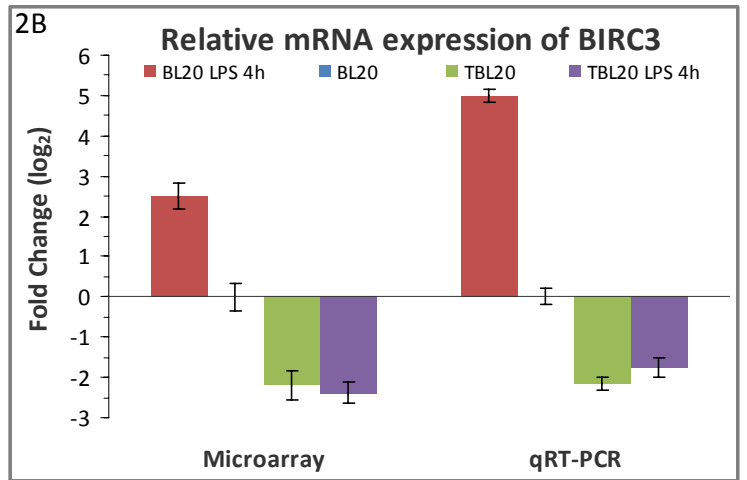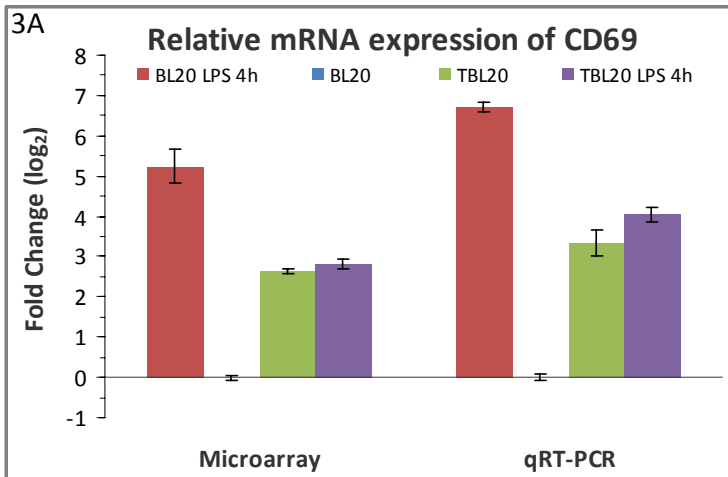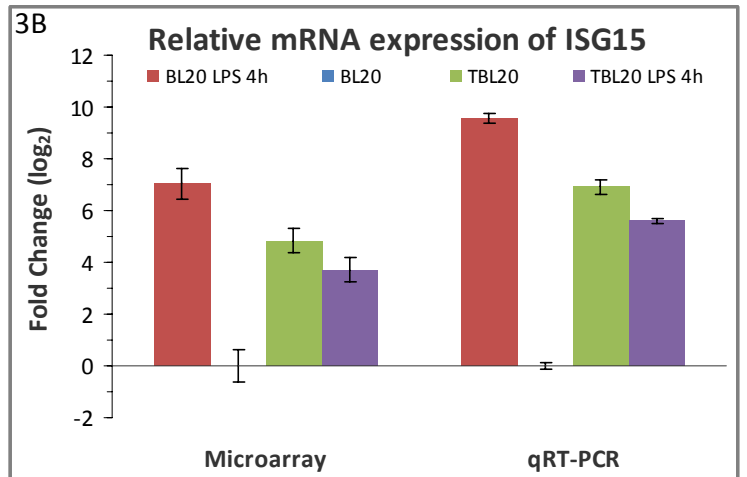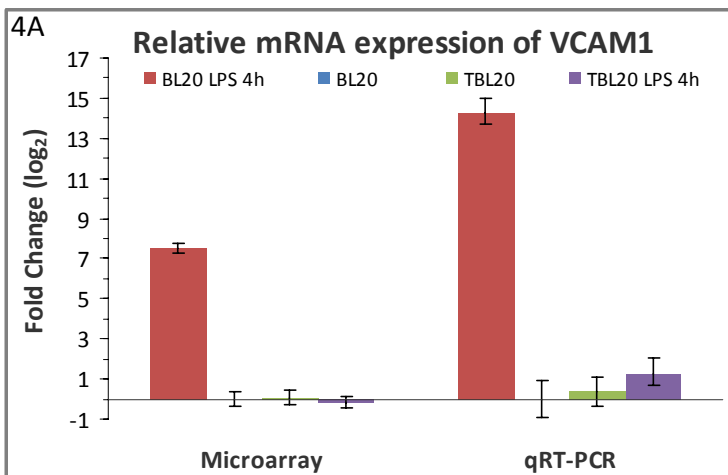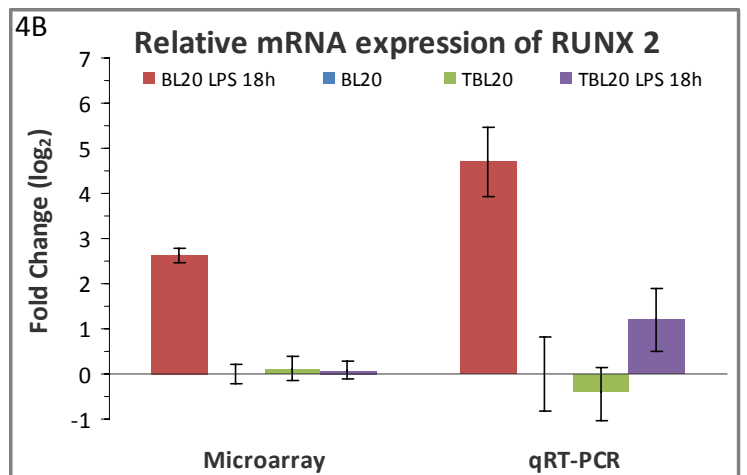

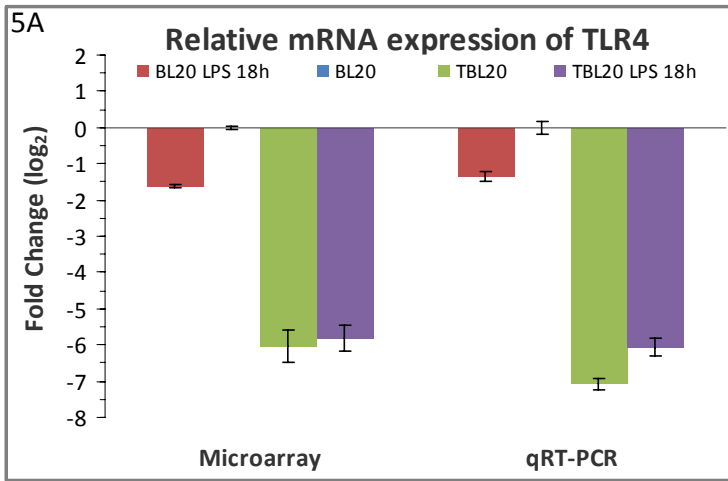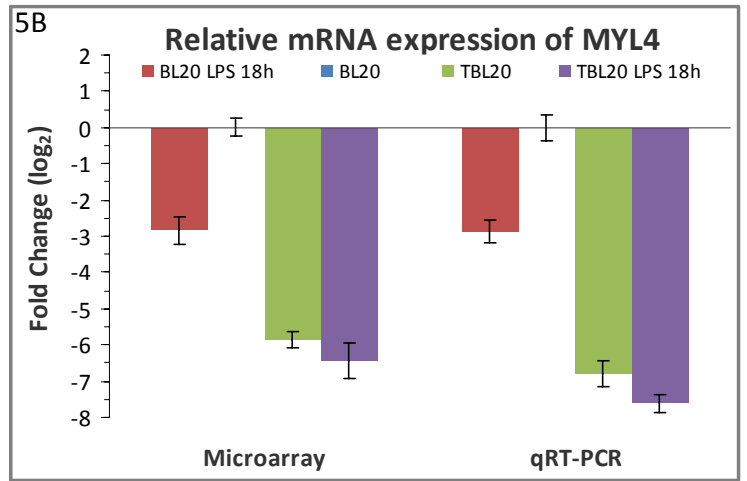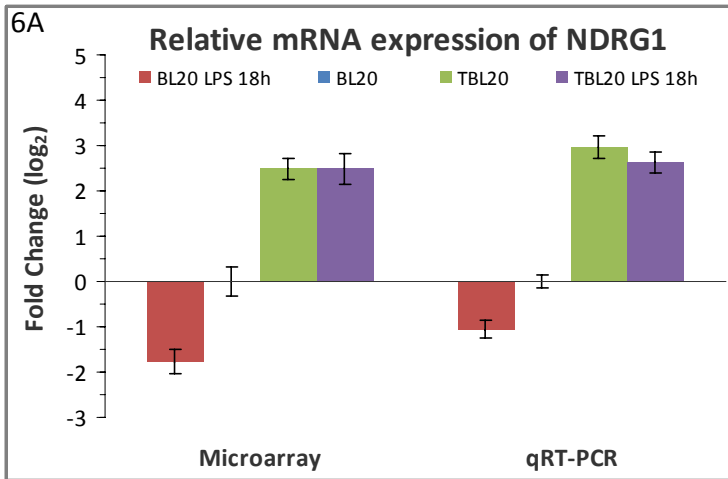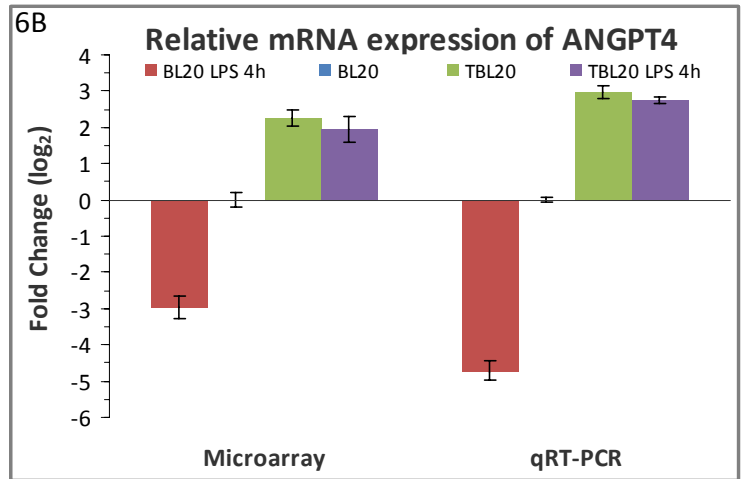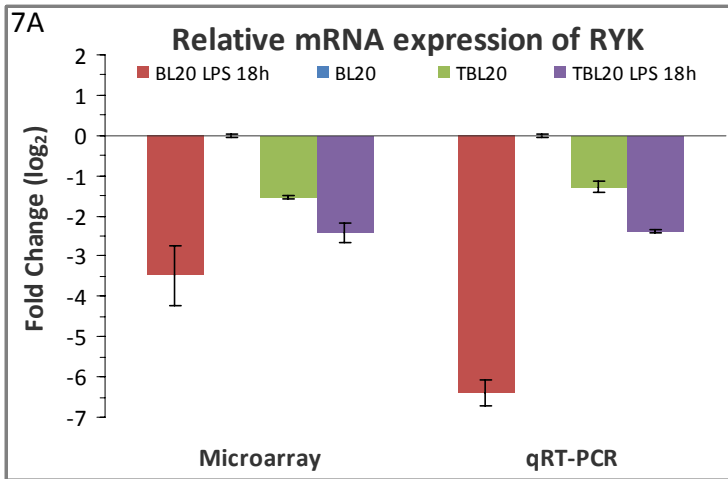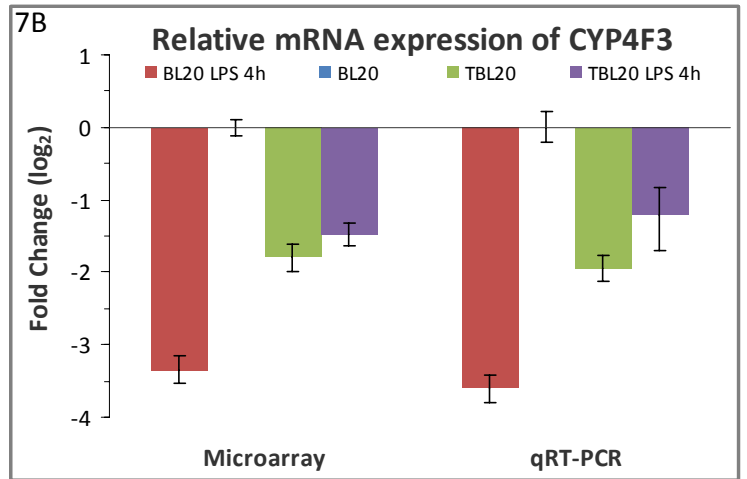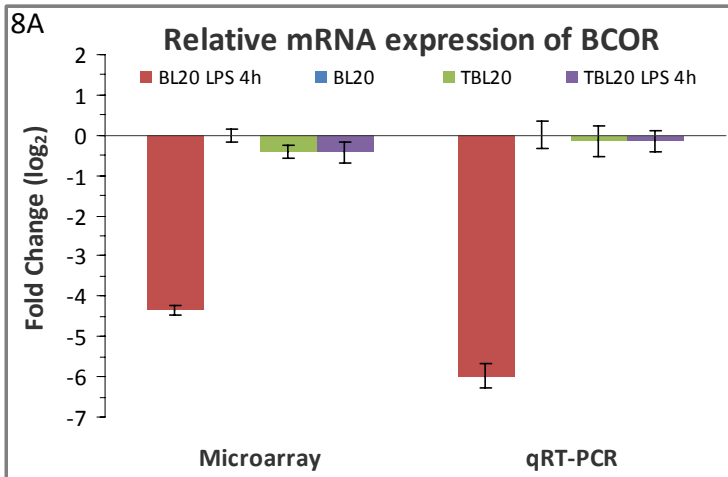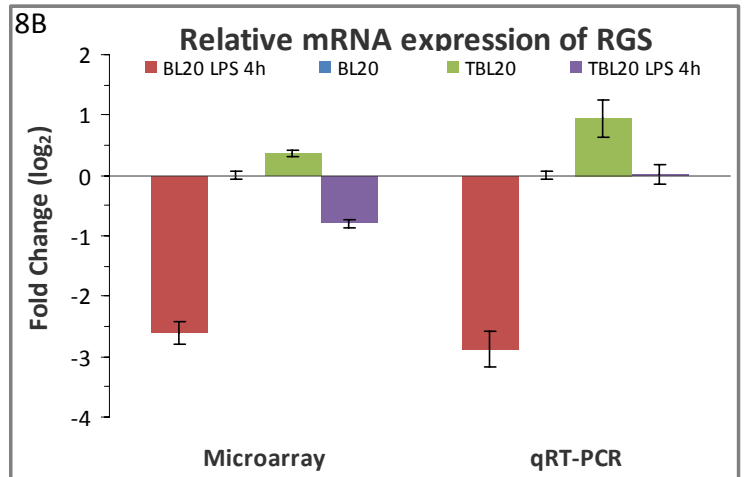

### Supplementary data figure 3. Top ranking cellular and molecular functions from pathway analysis

| Category                               | p-value               | Molecules                                                                                                                                                                                                                                                                                                          |
|----------------------------------------|-----------------------|--------------------------------------------------------------------------------------------------------------------------------------------------------------------------------------------------------------------------------------------------------------------------------------------------------------------|
| <b>Profile 1</b>                       |                       |                                                                                                                                                                                                                                                                                                                    |
| Cellular Movement                      | 7.23x10 <sup>-6</sup> | ELN, SELL, ICAM1, SLC2A1, TP73, XCL2, EGLN3, MMP13, SDC4, IL2RB, CTTN, CCL1                                                                                                                                                                                                                                        |
| Cell-To-Cell Signaling and Interaction | 1.47x10 <sup>-5</sup> | SELL, STXBP1, ICAM1, TP73, MMP13, SDC4, CTTN, IL2RB                                                                                                                                                                                                                                                                |
| Antigen Presentation                   | 5.3x10 <sup>-5</sup>  | ELN, SELL, ICAM1, EGLN3, CCL1                                                                                                                                                                                                                                                                                      |
| Cellular Compromise                    | 6.82x10 <sup>-5</sup> | SELL, ICAM1, TP73, ATXN1, IL2RB, CTTN                                                                                                                                                                                                                                                                              |
| Cell Signaling                         | 5.38x10 <sup>-4</sup> | ELN, SELL, ICAM1, TP73, XCL2, CCL1                                                                                                                                                                                                                                                                                 |
| Molecular Transport                    | 5.38x10 <sup>-4</sup> | ELN, SELL, STXBP1, ICAM1, SLC2A1, TP73, SLC6A6, XCL2, ABCG1, CCL1                                                                                                                                                                                                                                                  |
| Vitamin and Mineral Metabolism         | 5.38x10 <sup>-4</sup> | ELN, SELL, ICAM1, TP73, XCL2, CCL1                                                                                                                                                                                                                                                                                 |
| Cellular Growth and Proliferation      | 1.49x10 <sup>-3</sup> | ELN, ICAM1, SLC2A1, SLAMF7, TP73, EGLN3, ABCG1, IL2RB                                                                                                                                                                                                                                                              |
| Cell Morphology                        | 1.6x10 <sup>-3</sup>  | SELL, ICAM1, TP73, SDC4, CTTN, CCL1                                                                                                                                                                                                                                                                                |
| Cellular Development                   | 1.6x10 <sup>-3</sup>  | SELL, ICAM1, TP73, EGLN3, MMP13, SDC4, IL2RB, CTTN, CCL1                                                                                                                                                                                                                                                           |
| <b>Profile 2</b>                       |                       |                                                                                                                                                                                                                                                                                                                    |
| Cellular Growth and Proliferation      | 2.21x10 <sup>-4</sup> | GAB2, TBXA2R, null, MERTK, NGFR, IGF1R, COL18A1, ADRA1B, IGFBP6, CALCRL, PTPRG, LAIR1, ABCG2, LCN2, CD36, TRPC6, GGT1, PIGR, IL24, TLR4, MARCKSL1, IL18 (includes EG:16173), Gulo, DBC1, RASGRP1, NFE2, SH2B2, S1PR1, LEF1, PDGFD                                                                                  |
| Cellular Compromise                    | 3.76x10 <sup>-4</sup> | TLR4, HSPB2, NGFR, NFE2, ATP2A1, IGF1R, COL18A1, null, GPX7, SGCA, IL24                                                                                                                                                                                                                                            |
| Cellular Function and Maintenance      | 3.76x10 <sup>-4</sup> | GAB2, ABCG2, ATP2A1, CD36, TRPC6, IL24, PIGR, FCGR1A, ZNF423, TLR4, IL18 (includes EG:16173), MERTK, NGFR, SH2B2, IGF1R, S1PR1, RGNF, COL18A1, CCR6, null                                                                                                                                                          |
| Cell Death                             | 4.94x10 <sup>-4</sup> | GAB2, POU2AF1, HSPB2, ATP2A1, TBXA2R, TMEM132A, SGCA, FCGR1A, C16orf5, RPS3A, MERTK, RGS5, NGFR, IGF1R, ALPK2, COL18A1, IGFBP6, PTPRG, CALCRL, LAIR1, ABCG2, LCN2, CD36, SGMS2, F13A1, GGT1, IL24, GPX7, PIGR, TLR4, ZNF423, IL18 (includes EG:16173), EBF1, NFE2, RASGRP1, DBC1, PPP2R2B, S1PR1, LEF1, ABCC3      |
| Cellular Development                   | 5.41x10 <sup>-4</sup> | GAB2, TCN2, LMO2, POU2AF1, TBXA2R, CDH23, IGF2BP1, MBNL3, RPS3A, POU6F2, RGS5, MERTK, NGFR, IGF1R, COL18A1, CCR6, IGFBP6, PTPRG, CTSK, LAIR1, ABCG2, LCN2, CD36, TRPC6, GGT1, IL24, ZNF423, TLR4, IL18 (includes EG:16173), EBF1, RASGRP1, NFE2, SH2B2, S1PR1, LEF1, CPEB1                                         |
| Cellular Response to Therapeutics      | 6.24x10 <sup>-4</sup> | ABCG2, ABCC3                                                                                                                                                                                                                                                                                                       |
| Cell-To-Cell Signaling and Interaction | 7.3x10 <sup>-4</sup>  | GAB2, POU2AF1, TBXA2R, CDH23, MMRN1, null, FCGR1A, MERTK, IGF1R, AMICA1, COL18A1, CCR6, NINJ2, CALCRL, LAIR1, ABCG2, LCN2, CD36, F13A1, GGT1, IL24, PIGR, MARCKSL1, TLR4, IL18 (includes EG:16173), NFE2, RASGRP1, S1PR1, MYO1F, null, null                                                                        |
| Cellular Movement                      | 9.31x10 <sup>-4</sup> | GAB2, TBXA2R, null, IGF2BP1, NGFR, IGF1R, COL18A1, CCR6, IGFBP6, CALCRL, CTSK, LCN2, CD36, TRPC6, IL24, PIGR, TLR4, ZNF423, EBF1, IL18 (includes EG:16173), RASGRP1, S1PR1, MYO1F, LEF1, PDGFD, null                                                                                                               |
| Amino Acid Metabolism                  | 1.3x10 <sup>-3</sup>  | ABCG2, FOLR2, ABCC3, GGT1                                                                                                                                                                                                                                                                                          |
| Drug Metabolism                        | 1.3x10 <sup>-3</sup>  | IL18 (includes EG:16173), ABCG2, FOLR2, GGT1, ABCC3                                                                                                                                                                                                                                                                |
| <b>Profile 3</b>                       |                       |                                                                                                                                                                                                                                                                                                                    |
| Cell-To-Cell Signaling and Interaction | 3.51x10 <sup>-5</sup> | BMP4, WNT10B, PDGFA, CUBN, SOCS2, CLU, PCDHGB4, HES1 (includes EG:15205), CD163, TNXB, LYST, TNFSF9, MARCKS, ICOSLG, FGR, MUC1, RGMB, GPR44, EPAS1, PLXNC1, THBS1, CHN1, CD200R1, IL15 (includes EG:16168), CD48, BAMBI, IFNAR2, ITGB3, KNG1, CD80 (includes EG:12519), VAV3, IRF8                                 |
| Cell Morphology                        | 5.42x10 <sup>-5</sup> | GAS7, WNT10B, BMP4, PDGFA, THBS1, CHN1, SOCS2, HES1 (includes EG:15205), ITGB3, UBD, KNG1, LYST, ICAM5, VAV3, CEBPA, ARHGAP31, PLEK, MARCKS, GBP2 (includes EG:14469), FGR                                                                                                                                         |
| Cellular Development                   | 6.32x10 <sup>-5</sup> | BMP4, WNT10B, PDGFA, CLU, SSBP2, HES1 (includes EG:15205), SIGLEC10, CD163, CDKN2B, TNFSF9, CEBPA, GBP2 (includes EG:14469), MARCKS, PLAC8, FGR, ICOSLG, MUC1, EPAS1, CHN1, THBS1, IL15 (includes EG:16168), STAP1, IKBKE, IFNAR2, ITGB3, KNG1, CD80 (includes EG:12519), VAV3, IRF8, MYO1E                        |
| Cellular Movement                      | 7.05x10 <sup>-5</sup> | HTATIP2, BMP4, RGS18, PDGFA, SOCS2, CLU, LYST, TNFSF9, ADAM19, MARCKS, ICOSLG, FGR, MUC1, GPR44, CD207, EPAS1, THBS1, IL15 (includes EG:16168), CD48, ITGB3, PRKCG, KNG1, CD80 (includes EG:12519), VAV3, RPS6KA5, IRF8                                                                                            |
| Cellular Growth and Proliferation      | 7.26x10 <sup>-5</sup> | WNT10B, BMP4, PDGFA, SOCS2, CLU, SSBP2, SIGLEC10, HES1 (includes EG:15205), CD163, CDKN2B, RASAL1, TNFSF9, CEBPA, GBP2 (includes EG:14469), PLAC8, ICOSLG, MUC1, TP53INP1, EPAS1, THBS1, SAMSN1, IL15 (includes EG:16168), CD48, BAMBI, IKBKE, IFNAR2, ITGB3, PRKCG, KNG1, CD80 (includes EG:12519), RPS6KA5, IRF8 |
| Cellular Function and Maintenance      | 1.28x10 <sup>-4</sup> | MUC1, BMP4, PDGFA, CHN1, THBS1, IL15 (includes EG:16168), CLU, IKBKE, CD163, IFNAR2, ITGB3, KNG1, CD80 (includes EG:12519), ICAM5, VAV3, CEBPA, MARCKS, PLEK, IRF8, FGR, ICOSLG                                                                                                                                    |

|                                        |                       |                                                                                                                                                                                                                                                                                                                 |
|----------------------------------------|-----------------------|-----------------------------------------------------------------------------------------------------------------------------------------------------------------------------------------------------------------------------------------------------------------------------------------------------------------|
| Cellular Compromise                    | 1.48x10 <sup>-4</sup> | UBD, BMP4, CD80 (includes EG:12519), THBS1, IL15 (includes EG:16168), CLU, IRF8, FGR, ITGB3                                                                                                                                                                                                                     |
| Cell Death                             | 1.9x10 <sup>-4</sup>  | HTATIP2, BMP4, PDGFA, SGK1, SOCS2, CLU, HES1 (includes EG:15205), CDKN2B, TNFSF9, EAF2, CEBPA, BIRC3, PLAC8, ICOSLG, FGR, EPHA7, MUC1, GPR44, TP53INP1, EPAS1, THBS1, IL15 (includes EG:16168), CD48, IKBKE, IFNAR2, PRKCG, ITGB3, UBD, KNG1, NEK8, FABP6, CD80 (includes EG:12519), VAV3, RPS6KA5, IRF8, NTSR1 |
| Cellular Assembly and Organization     | 3.43x10 <sup>-4</sup> | GAS7, CD207, SEPT5, BMP4, AP1M2, THBS1, CHN1, PDGFA, SOCS2, CD48, CLU, TNXB, ITGB3, KNG1, LYST, VAV3, ICAM5, MARCKS, PLEK, FGR                                                                                                                                                                                  |
| Gene Expression                        | 6.22x10 <sup>-4</sup> | MUC1, RGMB, HTATIP2, EPAS1, BMP4, PDGFA, SGK1, SOCS2, IKBKE, HES1 (includes EG:15205), IFNAR2, RFX5, MEF2B, ITGB3, KNG1, CD80 (includes EG:12519), VAV3, EAF2, CEBPA, RPS6KA5, IRF8, SIM1 (includes EG:20464), FGR, PKIG                                                                                        |
| <b>Profile 4</b>                       |                       |                                                                                                                                                                                                                                                                                                                 |
| Cellular Movement                      | 9.98x10 <sup>-5</sup> | MTSS1, NDRG1, PIK3R5, LAMC1, PRF1, PAK1, HCK, ABI3, SPARC, ENPP2, TNFRSF1B, SEMA3F, CCR7                                                                                                                                                                                                                        |
| Cellular Function and Maintenance      | 2.33x10 <sup>-4</sup> | GZMA, PAK1, PRF1, HCK, TNFRSF1B, FOXA3, RNASEL, CCR7                                                                                                                                                                                                                                                            |
| Cellular Development                   | 6.98x10 <sup>-4</sup> | LAMC1, GZMA, PRF1, PAK1, NDRG1, HCK, SPARC, MLLT3, TNFRSF1B, RNASEL, CCR7                                                                                                                                                                                                                                       |
| Cellular Growth and Proliferation      | 6.98x10 <sup>-4</sup> | SUMO3, ENTPD1, NDRG1, LAMC1, PRF1, PAK1, HCK, SPARC, ENPP2, MLLT3, TNFRSF1B, SEMA3F, CCR7                                                                                                                                                                                                                       |
| Cell Death                             | 8.61x10 <sup>-4</sup> | GZMA, PDE4C, NDRG1, RNASEL, PAK1, PRF1, ANTXR2, HCK, SPARC, MLLT3, TNFRSF1B, SEMA3F, CCR7, STEAP3, EPHX1                                                                                                                                                                                                        |
| Cellular Assembly and Organization     | 1.5x10 <sup>-3</sup>  | LAMC1, PSTPIP1, PRF1, PAK1, MTSS1, HCK, DGKG, SPARC, ENPP2, SEMA3F, CCR7                                                                                                                                                                                                                                        |
| Cell-To-Cell Signaling and Interaction | 2.41x10 <sup>-3</sup> | GZMA, LAMC1, PRF1, PAK1, NDRG1, ENTPD1, HCK, SPARC, AP3M2, TNFRSF1B, SEMA3F, CCR7                                                                                                                                                                                                                               |
| Carbohydrate Metabolism                | 2.93x10 <sup>-3</sup> | CMAH, ENPP2                                                                                                                                                                                                                                                                                                     |
| Cell Morphology                        | 2.93x10 <sup>-3</sup> | GZMA, PRF1, PAK1, ENTPD1, MTSS1, NDRG1, HCK, SPARC, AP3M2                                                                                                                                                                                                                                                       |
| Cellular Compromise                    | 2.93x10 <sup>-3</sup> | GZMA, PAK1, PRF1, ENTPD1, NDRG1, MTSS1, SLA, HCK, TNFRSF1B, SEMA3F                                                                                                                                                                                                                                              |
| <b>Profile 5</b>                       |                       |                                                                                                                                                                                                                                                                                                                 |
| Cellular Movement                      | 9.36x10 <sup>-7</sup> | SMAD3, CD69, TGFB3, RELB, ITGA6, TNFAIP3, NFKB2, CX3CR1, NFKBIZ, IL7, CXCL10, JUN, MYO10                                                                                                                                                                                                                        |
| Cell-To-Cell Signaling and Interaction | 1.67x10 <sup>-6</sup> | TIFA, TGFB3, SMAD3, CD69, RELB, ACTA2, ITGA6, TNFAIP3, CD83, NFKB2, CX3CR1, BST2, IL7, CXCL10, JUN, BAIAP2, DDX58                                                                                                                                                                                               |
| Post-Translational Modification        | 4.13x10 <sup>-6</sup> | USP18, ITGA6, ISG15                                                                                                                                                                                                                                                                                             |
| Protein Folding                        | 4.13x10 <sup>-6</sup> | USP18, ISG15                                                                                                                                                                                                                                                                                                    |
| Gene Expression                        | 8.61x10 <sup>-6</sup> | MX2, RELB, SMAD3, TGFB3, ZBP1, ITGA6, TNFAIP3, NFKB2, NFKBIZ, IRF5, BST2, MAFF, IL7, JUN, PLK2, DDX58                                                                                                                                                                                                           |
| Cell Death                             | 2.95x10 <sup>-5</sup> | OAS1, USP18, INPP1, CD69, SMAD3, TGFB3, RELB, ITGA6, TNFAIP3, CX3CR1, NFKB2, NFKBIZ, IRF5, IL7, ISG15, CXCL10, JUN, PLK2, DDX58                                                                                                                                                                                 |
| Cellular Development                   | 3.22x10 <sup>-5</sup> | TGFB3, SMAD3, CD69, RELB, ITGA6, EXT1, CD83, NFKB2, IL7, MAFF, CXCL10, JUN, PLK2, BAIAP2                                                                                                                                                                                                                        |
| Cell Signaling                         | 6.87x10 <sup>-5</sup> | TIFA, TGFB3, PLK2, TNFAIP3, BST2                                                                                                                                                                                                                                                                                |
| Antigen Presentation                   | 1.5x10 <sup>-4</sup>  | CXCL10, CD69, RELB, SMAD3, DDX58, TNFAIP3, CD83, NFKB2, CX3CR1, IL7                                                                                                                                                                                                                                             |
| Cellular Growth and Proliferation      | 1.55x10 <sup>-4</sup> | SMAD3, TGFB3, RELB, ITGA6, CD83, NFKB2, IL7, BST2, MAFF, ISG15, CXCL10, JUN, PLK2                                                                                                                                                                                                                               |
| <b>Profile 6</b>                       |                       |                                                                                                                                                                                                                                                                                                                 |
| Lipid Metabolism                       | 2.69x10 <sup>-4</sup> | CYP3A4, FLT1, CYP4F3                                                                                                                                                                                                                                                                                            |
| Small Molecule Biochemistry            | 2.69x10 <sup>-4</sup> | CYP3A4, FLT1, CYP4F3, DNNT, STXBP6                                                                                                                                                                                                                                                                              |
| Cell Cycle                             | 8x10 <sup>-4</sup>    | FLT1                                                                                                                                                                                                                                                                                                            |
| Cell Morphology                        | 8x10 <sup>-4</sup>    | AQP3, TSPAN7, FLT1, RYK                                                                                                                                                                                                                                                                                         |
| Cell-To-Cell Signaling and Interaction | 8x10 <sup>-4</sup>    | PGLYRP1, FLT1                                                                                                                                                                                                                                                                                                   |
| Cellular Movement                      | 8x10 <sup>-4</sup>    | FLT1                                                                                                                                                                                                                                                                                                            |
| Drug Metabolism                        | 8x10 <sup>-4</sup>    | CYP3A4, STXBP6                                                                                                                                                                                                                                                                                                  |
| Molecular Transport                    | 8x10 <sup>-4</sup>    | AQP3, CYP3A4, FLT1, STXBP6                                                                                                                                                                                                                                                                                      |
| Vitamin and Mineral Metabolism         | 8x10 <sup>-4</sup>    | CYP3A4                                                                                                                                                                                                                                                                                                          |
| Carbohydrate Metabolism                | 1.6x10 <sup>-3</sup>  | CYP3A4, FLT1                                                                                                                                                                                                                                                                                                    |

| <b>Profile 7</b>                           |                       |                                                                                                                                                                                                                                                                                                                                                                                                                                                                                                                                                                                                                                                                |
|--------------------------------------------|-----------------------|----------------------------------------------------------------------------------------------------------------------------------------------------------------------------------------------------------------------------------------------------------------------------------------------------------------------------------------------------------------------------------------------------------------------------------------------------------------------------------------------------------------------------------------------------------------------------------------------------------------------------------------------------------------|
| Cellular Development                       | 9.99x10 <sup>-6</sup> | OSTN, SOCS1, CTGF, SP7, CDK5R1, IFIH1, MYLK, NCAM2, BAIAP2, CCR8, RIPK2, TEK, KLRC1, ITK, SPP1 (includes EG:20750), ATF3, CHN1, IL6R, TYK2, TDRD7, RORC, ANXA2, TSPAN33, JUNB, ADAR, PPP1R13L, CCL4, CD40, GCNT1, FSCN1, PTPRB, CFLAR, POU1F1, SNCA, B2M, CRLF2, LEPR, KLRD1, BATF, ROBO1, NOTCH2, NFKBIA, LZTS1, CREB1, KLRA1, MYO1A, ROBO2, TRAF1, HEY1, NCKAP1, VCAM1, IRF4, TP63, C5, NFATC1, FABP2, ZBTB32, PRKCI, NR4A2, IL12B, CSF1 (includes EG:12977), CDKN1A, NR4A1, REC8 (includes EG:290227), COL11A1                                                                                                                                              |
| Cell Death                                 | 1.34x10 <sup>-5</sup> | SOCS1, CTGF, DENND4A, KLF6, null, CDK5R1, MYLK, IFIH1, CASR, UBA7, TRAF4, NEK6, CCR8, RIPK2, MVP, KLRC1, ITK, NOVA1, SPP1 (includes EG:20750), ATF3, DDX4, Prune2 (mouse), SNAI1, TYK2, IL6R, null, RORC, IRF9, JUNB, ADAR, NCOA3, UBD, CCL4, PPP1R13L, CD40, GCNT1, NUP210, MAPK10, STAT2, CFLAR, ITGA7, SNCA, B2M, TNFAIP8, CA2, SNX33, INPP1, KLRD1, LEPR, CASP4, TANK, NOTCH2, NFKBIA, HLA-A, TNIP2, STK17A, CREB1, KLRA1, IFI6, EYA4, CFH, GABRA2, FAP, B4GALT5, TRAF1, HEY1, NCKAP1, VCAM1, OAS1, IRF4, TP63, DVL1, C5, NFATC1, UACA, SERPINB4, CDC42BPA, GABRG2, PRKCI, NR4A2, CSF1 (includes EG:12977), CAPRIN2, IL12B, CDKN1A, NR4A1, MAP3K8, EIF2AK2 |
| Gene Expression                            | 2.34x10 <sup>-5</sup> | SOCS1, RGS18, VPS39, LEPR, NFKBIE, BATF, KLF6, ELL3, TANK, CASR, NOTCH2, NFKBIA, BCAT2, NEK6, CREB1, RIPK2, VCAM1, IRF4, TP63, ATF3, SPP1 (includes EG:20750), IL6R, DVL1, IRF9, NFATC1, JUNB, NCOA3, GPR183, CXCL16, ZBTB32, NR4A2, CD40, CSF1 (includes EG:12977), CDKN1A, NR4A1, MAP3K8, STAT2, NRIP1, EIF2AK2, CFLAR, POU1F1                                                                                                                                                                                                                                                                                                                               |
| Cellular Movement                          | 2.64x10 <sup>-5</sup> | SOCS1, CTGF, EPS8, TCIRG1, SP7, null, CDK5R1, MYLK, CASR, LCAT, CCR8, TEK, ITK, SPP1 (includes EG:20750), SNAI1, IL6R, ANXA2, NCOA3, CCL4, CD40, GCNT1, FSCN1, TNFAIP8, AOC3, CLDN11, RGS18, ROBO1, PARP9, NFKBIA, KLRA1, ERFF1, ROBO2, CFH, FAP, HEY1, NCKAP1, VCAM1, TP63, CD58, C5, NFATC1, CXCL16, PRKCI, NR4A2, CSF1 (includes EG:12977), IL12B, CDKN1A, MAP3K8, null                                                                                                                                                                                                                                                                                     |
| Cellular Function and Maintenance          | 2.93x10 <sup>-5</sup> | B2M, SOCS1, EPS8, CRLF2, KLRD1, BATF, MYLK, NFKBIA, PLS3, CREB1, CCR8, RIPK2, ITK, KLRC1, TRAF1, SPP1 (includes EG:20750), IRF4, KALRN, TYK2, IL6R, RORC, ANXA2, NFATC1, JUNB, CDC42BPA, CCL4, PRKCI, CD40, IL12B, CSF1 (includes EG:12977), FSCN1, CDKN1A, NR4A1, COL11A1, CFLAR, COL3A1                                                                                                                                                                                                                                                                                                                                                                      |
| Carbohydrate Metabolism                    | 5.61x10 <sup>-5</sup> | SOCS1, OSTN, DYRK2, CASR, CTGF, CD40, LCAT, LEPR, CSF1 (includes EG:12977), PPP1R3C, NR4A1, TEK                                                                                                                                                                                                                                                                                                                                                                                                                                                                                                                                                                |
| Cell-To-Cell Signaling and Interaction     | 9.34x10 <sup>-5</sup> | SOCS1, CTGF, TCIRG1, JAM2, MLLT4, null, CDK5R1, IFIH1, CASR, NCAM2, LPL, CCR8, TIMD4, RIPK2, TEK, KLRC1, ITK, BLOC1S3, SPP1 (includes EG:20750), TYK2, IL6R, ANXA2, JUNB, CCL4, CD40, GCNT1, PTPRB, STAT2, SNCA, ITGA7, C3AR1, AOC3, B2M, CLDN11, NLGN3, KLRD1, ROBO1, AICDA, IDH1, NFKBIA, HLA-A, KLRA1, CFH, ROBO2, VCAM1, TP63, CD58, NFATC1, C5, CXCL16, CSF1 (includes EG:12977), IL12B, CDKN1A, NR4A1, MAP3K8, EIF2AK2, IRAK2                                                                                                                                                                                                                            |
| Cellular Growth and Proliferation          | 9.59x10 <sup>-5</sup> | SOCS1, EPS8, CTGF, INSIG1, TCIRG1, KLF6, CDK5R1, IFIH1, CASR, LCAT, TRAF4, TIMD4, RIPK2, TEK, MVP, KLRC1, ITK, ATF3, SPP1 (includes EG:20750), ANGPTL6, DDX4, IL6R, TYK2, RORC, ANXA2, JUNB, NCOA3, CCL4, CD40, TES, GCNT1, FSCN1, CFLAR, POU1F1, C3AR1, SNCA, ITGA7, B2M, TNFAIP8, CLDN11, CRLF2, KLRD1, LEPR, BATF, AICDA, NOTCH2, NFKBIA, LZTS1, CREB1, TRAF1, HEY1, VCAM1, CACNA1D, IRF4, TP63, CD58, NFATC1, C5, CXCL16, ZBTB32, FABP2, IL12B, CSF1 (includes EG:12977), TBC1D8, CDKN1A, NR4A1, EIF2AK2, NRIP1, null                                                                                                                                      |
| Protein Synthesis                          | 3.11x10 <sup>-4</sup> | B2M, SPP1 (includes EG:20750), TP63, ATF3, DDX4, C5, CD40, CREB1, LPL, CDKN1A, MYO1A, CFH, POU1F1, TRAF1, NCKAP1                                                                                                                                                                                                                                                                                                                                                                                                                                                                                                                                               |
| Cell Cycle                                 | 3.57x10 <sup>-4</sup> | SOCS1, SNX33, NOTCH2, NFKBIA, LZTS1, CREB1, NEK6, DSTN, ERFF1, VCPPIP1, TP63, ATF3, SPP1 (includes EG:20750), IL6R, null, IRF9, C5, NFATC1, JUNB, NCOA3, UBD, NR4A2, CD40, IL12B, CSF1 (includes EG:12977), PTPRB, CDKN1A, NR4A1, SIK1, REC8 (includes EG:290227), MAP3K8, NRIP1, EIF2AK2, null, null                                                                                                                                                                                                                                                                                                                                                          |
| <b>Profile 8</b>                           |                       |                                                                                                                                                                                                                                                                                                                                                                                                                                                                                                                                                                                                                                                                |
| Cell Signaling                             | 8.36x10 <sup>-5</sup> | RGS1, SPP1 (includes EG:20750), F2R, TRIM9, HBEGF, GRK5, MAPK13, FCGR2B, PDE4D, SV2A, LTB4R, ARRB2, CARD10, CD5, SPINT2, TLR3, CARD11, FCGR3A, ADRB2                                                                                                                                                                                                                                                                                                                                                                                                                                                                                                           |
| DNA Replication, Recombination, and Repair | 8.36x10 <sup>-5</sup> | IGFBP4, ARRB2, SPP1 (includes EG:20750), F2R, MAF, HBEGF, TLR3, PDE4D, ADRB2                                                                                                                                                                                                                                                                                                                                                                                                                                                                                                                                                                                   |
| Nucleic Acid Metabolism                    | 8.36x10 <sup>-5</sup> | ARRB2, F2R, SLC19A1, GRK5, PDE4D, CTPS, ADRB2                                                                                                                                                                                                                                                                                                                                                                                                                                                                                                                                                                                                                  |
| Small Molecule Biochemistry                | 8.36x10 <sup>-5</sup> | IGFBP4, SPP1 (includes EG:20750), SLC7A11, SLC1A4, F2R, MFNG, SLC1A5, HBEGF, GRK5, FCGR2B, PDE4D, CTPS, SYNJ2, ARRB2, LTB4R, CD5, PHGDH, SLC19A1, PDK2, PDK1, ADRB2                                                                                                                                                                                                                                                                                                                                                                                                                                                                                            |
| Amino Acid Metabolism                      | 4.36x10 <sup>-4</sup> | SLC1A4, SLC7A11, SLC1A5, PHGDH, SLC19A1                                                                                                                                                                                                                                                                                                                                                                                                                                                                                                                                                                                                                        |
| Molecular Transport                        | 4.36x10 <sup>-4</sup> | RGS1, SPP1 (includes EG:20750), SLC7A11, SLC1A4, F2R, TRIM9, SLC1A5, GRK5, FCGR2B, PDE4D, SV2A, ARRB2, LTB4R, CD5, PHGDH, SPINT2, SLC19A1, TLR3, FCGR3A, ADRB2                                                                                                                                                                                                                                                                                                                                                                                                                                                                                                 |
| Cellular Movement                          | 4.36x10 <sup>-4</sup> | RGS1, IGFBP4, PODXL, SPP1 (includes EG:20750), F2R, HBEGF, FCGR2B, PDE4D, SERPINE2, LTB4R, ARRB2, STARD13, PCSK4, SPINT2, IGSF8, TLR3, PLCL1, TNS1, FCGR3A, E2F2, ETV5, ADRB2                                                                                                                                                                                                                                                                                                                                                                                                                                                                                  |
| Vitamin and Mineral Metabolism             | 4.38x10 <sup>-4</sup> | RGS1, SPP1 (includes EG:20750), F2R, HBEGF, GRK5, FCGR2B, LTB4R, ARRB2, CD5, SLC19A1, SPINT2, TLR3, FCGR3A, ADRB2                                                                                                                                                                                                                                                                                                                                                                                                                                                                                                                                              |
| Cellular Assembly and Organization         | 1.82x10 <sup>-3</sup> | PODXL, SPP1 (includes EG:20750), F2R, HBEGF, GRK5, SERPINE2, SYNJ2, LTB4R, SORBS1, STARD13, FGD4, MAP1LC3A, ARHGEF3, TNS1, ARHGEF9, ADRB2                                                                                                                                                                                                                                                                                                                                                                                                                                                                                                                      |
| Cellular Growth and Proliferation          | 1.87x10 <sup>-3</sup> | IGFBP4, SPP1 (includes EG:20750), SLC7A11, F2R, SPRY1, MAF, HBEGF, GRK5, ARNT2, FCGR2B, PDE4D, SERPINE2, LTB4R, ANKRD1, CD5, STARD13, PCSK4, SPINT2, SLC19A1, TLR3, CARD11, E2F2, FCGR3A, ADRB2                                                                                                                                                                                                                                                                                                                                                                                                                                                                |

**Supplementary data table 1 Full list of genes in profile 1(n = 32)**

| Profile_ S. No | SEQ. ID      | Acc. No. (RefSeq) | Putative Gene symbol | Gene Name                                                                   | BL20 LPS Vs BL20 FDR (4h/or18) | BL20 LPS Vs BL20 Abs: FC (4h/or18) | TBL20 Vs BL20 Abs: FC | TBL20 Vs BL20 LPS Abs: FC (4h/or18) | BW720c Response |
|----------------|--------------|-------------------|----------------------|-----------------------------------------------------------------------------|--------------------------------|------------------------------------|-----------------------|-------------------------------------|-----------------|
| 1_1            | gi_119889107 | XM_001256711      | SLAMF7               | Slam family member 7                                                        | 0.00                           | 2.8                                | 415.4                 | 148.0                               | ---             |
| 1_2            | gi_119903692 | XM_871827         | LRRTM4               | Leucine rich repeat transmembrane neuronal 4                                | 0.00                           | 3.6                                | 242.6                 | 67.9                                | ---             |
| 1_3            | gi_31342133  | NM_174389         | MMP13                | Matrix metalloproteinase 13 (collagenase 3)                                 | 0.00                           | 3.1                                | 168.2                 | 54.2                                | ↓               |
| 1_4            | gi_31342239  | NM_175716         | XCL2                 | Chemokine (c motif) ligand 1                                                | 0.00                           | 8.5                                | 356.6                 | 42.0                                | ↓               |
| 1_5            | gi_119927959 | XM_593064         | TP73                 | Tumor protein p73                                                           | 0.00                           | 2.7                                | 53.6                  | 20.0                                | ---             |
| 1_6            | gi_139948768 | NM_001083791      | SH3BGR2              | SH3 domain binding glutamic acid-rich protein like 2                        | 0.00                           | 3.2                                | 45.0                  | 14.0                                | ---             |
| 1_7            | gi_119894051 | XM_587301         | IL2RB                | Interleukin 2 receptor, beta                                                | 0.00                           | 8.3                                | 93.1                  | 11.2                                | ---             |
| 1_8            | gi_27901800  | NM_174182         | SELL                 | Selectin L                                                                  | 0.01                           | 2.2                                | 21.4                  | 9.6                                 | ↑               |
| 1_9            | gi_119911540 | XM_001253061      | CCL1                 | Chemokine (c-c motif) ligand 1                                              | 0.00                           | 3.0                                | 27.1                  | 9.2                                 | ↓               |
| 1_10           | gi_119910732 | XM_869544         | MEIS3                | Meis homeobox 3                                                             | 0.00                           | 8.3                                | 71.0                  | 8.5                                 | ↓               |
| 1_11           | gi_31342240  | NM_174348         | ICAM1                | Intercellular adhesion molecule 1                                           | 0.00                           | 3.8                                | 22.8                  | 6.0                                 | ---             |
| 1_12           | gi_158341675 | NM_001109983      | PGPEP1               | Pyroglutamyl-peptidase i                                                    | 0.00                           | 4.8                                | 22.4                  | 4.7                                 | ---             |
| 1_13           | gi_119908880 | XM_001253453      | LOC785427            | Similar to epidermis-specific serine protease-like protein                  | 0.00                           | 4.7                                | 22.1                  | 4.7                                 | ↑               |
| 1_14           | gi_119900312 | XM_612930         | BNC2                 | Basonuclin 2                                                                | 0.00                           | 4.9                                | 22.6                  | 4.6                                 | ---             |
| 1_15           | gi_114051048 | NM_001046491      | MOBK12B              | Mob1, mps one binder kinase activator-like 2b (yeast)                       | 0.01                           | 2.1                                | 8.6                   | 4.1                                 | ---             |
| 1_16           | gi_31341516  | NM_174619         | STXB1                | Syntaxin binding protein 1                                                  | 0.00                           | 2.9                                | 11.2                  | 3.9                                 | ---             |
| 1_17           | gi_119891399 | XM_599768         | JHDM1D               | Jumonji c domain containing histone demethylase 1 homolog d (s. Cerevisiae) | 0.00                           | 2.7                                | 9.9                   | 3.7                                 | ---             |
| 1_18           | gi_119915826 | XM_868412         | ATXN1                | Ataxin 1                                                                    | 0.00                           | 3.5                                | 12.8                  | 3.6                                 | ---             |
| 1_19           | gi_119903194 | XM_001255518      | IL18RAP              | Interleukin 18 receptor accessory protein                                   | 0.00                           | 4.1                                | 14.3                  | 3.5                                 | ↓               |
| 1_20           | gi_119914616 | XM_597868         | LOC519644            | Similar to voltage-gated calcium channel alpha(2)delta-3 subunit            | 0.01                           | 2.1                                | 7.3                   | 3.4                                 | ↑               |
| 1_21           | gi_115495042 | NM_001075961      | RTP4                 | Receptor (chemosensory) transporter protein 4                               | 0.00                           | 4.5                                | 14.9                  | 3.3                                 | ↑               |
| 1_22           | gi_31341539  | NM_174610         | SLC6A6               | Solute carrier family 6 (neurotransmitter transporter, taurine), member 6   | 0.00                           | 17.0                               | 55.6                  | 3.3                                 | ↓               |
| 1_23           | gi_28461172  | NM_175772         | ELN                  | Elastin                                                                     | 0.00                           | 3.2                                | 10.2                  | 3.2                                 | ↓               |
| 1_24           | gi_119887104 | XM_587930         | ABCG1                | Atp-binding cassette, sub-family g (white), member 1                        | 0.00                           | 3.5                                | 9.6                   | 2.7                                 | ↓               |
| 1_25           | gi_31341556  | NM_174602         | SLC2A1               | Solute carrier family 2 (facilitated glucose transporter), member 1         | 0.00                           | 2.3                                | 6.2                   | 2.7                                 | ↓               |
| 1_26           | gi_119906041 | XM_584869         | SDC4                 | Syndecan 4                                                                  | 0.00                           | 5.6                                | 14.9                  | 2.7                                 | ---             |
| 1_27           | gi_119890101 | XM_616138         | CACHD1               | Cache domain containing 1                                                   | 0.00                           | 2.3                                | 5.7                   | 2.5                                 | ---             |
| 1_28           | gi_114051635 | NM_001046438      | NRN1                 | Neuritin 1                                                                  | 0.00                           | 12.3                               | 29.4                  | 2.4                                 | ---             |
| 1_29           | gi_78369225  | NM_001035273      | SSBP4                | Single stranded dna binding protein 4                                       | 0.00                           | 5.6                                | 13.3                  | 2.4                                 | ---             |
| 1_30           | gi_115497085 | NM_001075287      | CTTN                 | Cortactin                                                                   | 0.00                           | 11.0                               | 25.0                  | 2.3                                 | ↓               |
| 1_31           | gi_155372054 | NM_001101164      | EGLN3                | EGL nine homolog 3 (c. Elegans)                                             | 0.00                           | 2.6                                | 5.8                   | 2.2                                 | ---             |
| 1_32           | gi_119919443 | XM_588001         | TNFRSF26             | Tumor necrosis factor receptor serfamily, member 26                         | 0.01                           | 2.2                                | 4.8                   | 2.2                                 | ---             |

**Supplementary data table 2 Full list of genes in profile 2 (n = 180)**

| Profile_ S. No | SEQ. ID      | Acc. No. (RefSeq) | Putative Gene symbol | Gene Name                                                      | BL20 LPS Vs BL20 FDR (4h/or18) | BL20 LPS Vs BL20 Abs: FC (4h/or18) | TBL20 Vs BL20 Abs: FC | TBL20 Vs BL20 LPS Abs: FC (4h/or18) | BW720c Response |
|----------------|--------------|-------------------|----------------------|----------------------------------------------------------------|--------------------------------|------------------------------------|-----------------------|-------------------------------------|-----------------|
| 2_1            | gi_119902260 | XM_603355         | LOC404176            | T-cell receptor delta chain                                    | 0.00                           | -2.7                               | -238.3                | -88.0                               | ↑               |
| 2_2            | gi_119913552 | XM_606794         | IGF1R                | Insulin-like growth factor 1 receptor                          | 0.01                           | -2.0                               | -171.5                | -85.2                               | ---             |
| 2_3            | gi_119925613 | XM_583887         | GXYLT2               | Glucoside xylosyltransferase 2                                 | 0.00                           | -2.7                               | -222.3                | -83.3                               | ---             |
| 2_4            | gi_119915839 | XM_588122         | F13A1                | Coagulation factor xiii, a1 polypeptide                        | 0.00                           | -2.3                               | -165.6                | -71.2                               | ---             |
| 2_5            | gi_119917736 | XM_609898         | SORCS3               | Soritin-related vps10 domain containing receptor 3             | 0.00                           | -5.4                               | -364.8                | -67.3                               | ---             |
| 2_6            | gi_119919107 | XM_591760         | SLC15A3              | Solute carrier family 15, member 3                             | 0.00                           | -2.4                               | -158.8                | -66.7                               | ↑               |
| 2_7            | gi_119911249 | XM_867060         | LAIR1                | Leukocyte-associated immunoglobulin-like receptor 1            | 0.00                           | -3.3                               | -174.7                | -52.8                               | ---             |
| 2_8            | gi_119923075 | XM_001254039      | LOC786327            | Hypothetical protein                                           | 0.00                           | -2.5                               | -96.9                 | -39.1                               | ↑               |
| 2_9            | gi_119891326 | XM_590508         | CPA4                 | Carboxypeptidase a4                                            | 0.00                           | -3.4                               | -119.2                | -35.2                               | ↑               |
| 2_10           | gi_119910462 | XM_592455         | LOC514582            | Similar to b-cell receptor cd22-b                              | 0.00                           | -2.4                               | -82.1                 | -34.8                               | ↑               |
| 2_11           | gi_119889163 | XM_001251523      | FCRLA                | Fc receptor-like a                                             | 0.00                           | -2.8                               | -80.3                 | -28.2                               | ↑               |
| 2_12           | gi_134085858 | NM_001083409      | C1QTNF1              | C1q and tumor necrosis factor related protein 1                | 0.00                           | -5.4                               | -150.3                | -27.7                               | ↑               |
| 2_13           | gi_76660614  | XM_597941         | CCR6                 | Chemokine (c-c motif) receptor 6                               | 0.00                           | -3.1                               | -71.6                 | -23.2                               | ↑               |
| 2_14           | gi_126723186 | NM_174198         | TLR4                 | Toll-like receptor 4                                           | 0.00                           | -2.9                               | -61.4                 | -21.4                               | ↑               |
| 2_15           | gi_134085612 | NM_001083388      | COL18A1              | Collagen, type xviii, alpha 1                                  | 0.00                           | -3.7                               | -72.5                 | -19.6                               | ---             |
| 2_16           | gi_119895038 | XM_001256059      | ZNF77                | Similar to zinc finger protein 77                              | 0.00                           | -2.3                               | -42.3                 | -18.2                               | ---             |
| 2_17           | gi_119893570 | XM_615475         | LEF1                 | Lymphoid enhancer-binding factor 1                             | 0.00                           | -3.5                               | -52.4                 | -15.0                               | ↑               |
| 2_18           | gi_119906950 | XM_001251159      | PPP1R14C             | Protein phosphatase 1, regulatory (inhibitor) subunit 14c      | 0.00                           | -6.3                               | -92.1                 | -14.7                               | ---             |
| 2_19           | gi_119900339 | XM_614789         | KANK1                | Kn motif and ankyrin repeat domains 1                          | 0.00                           | -3.0                               | -43.9                 | -14.6                               | ↑               |
| 2_20           | gi_119895702 | XM_616288         | SH3TC2               | Sh3 domain and tetratricopeptide repeats 2                     | 0.01                           | -2.0                               | -26.6                 | -13.1                               | ↑               |
| 2_21           | gi_119909284 | XM_868620         | HVCN1                | Hydrogen voltage-gated channel 1                               | 0.00                           | -2.3                               | -30.4                 | -13.0                               | ↑               |
| 2_22           | gi_149642838 | NM_001099200      | PNPLA1               | Patatin-like phospholipase domain containing 1                 | 0.00                           | -7.5                               | -93.7                 | -12.5                               | ---             |
| 2_23           | gi_119910899 | XM_001254077      | LOC786386            | Hypothetical protein                                           | 0.00                           | -2.4                               | -28.7                 | -12.0                               | ---             |
| 2_24           | gi_119911051 | XM_599883         | CACNG6               | Calcium channel, voltage-dependent, gamma subunit 6            | 0.00                           | -2.6                               | -27.8                 | -10.6                               | ---             |
| 2_25           | gi_119919031 | XM_869090         | VSIG2                | Similar to v-set and immunoglobulin domain containing 2        | 0.00                           | -2.3                               | -21.9                 | -9.3                                | ---             |
| 2_26           | gi_119916419 | XM_587341         | ALPK2                | Alpha-kinase 2                                                 | 0.00                           | -11.3                              | -104.0                | -9.2                                | ---             |
| 2_27           | gi_119911988 | XM_582998         | SPECC1               | Sperm antigen with calponin homology and coiled-coil domains 1 | 0.00                           | -2.8                               | -24.4                 | -8.8                                | ↑               |
| 2_28           | gi_119920600 | XM_001249543      | LOC781191            | Hypothetical protein                                           | 0.01                           | -2.0                               | -17.7                 | -8.7                                | ↑               |
| 2_29           | gi_115496172 | NM_001075149      | MYL4                 | Myosin, light chain 4, alkali; atrial, embryonic               | 0.00                           | -6.9                               | -58.7                 | -8.6                                | ↑               |
| 2_30           | gi_156120728 | NM_001102041      | C13orf18             | Chromosome 13 open reading frame 18                            | 0.01                           | -2.1                               | -17.8                 | -8.6                                | ↑               |
| 2_31           | gi_119913257 | XM_616682         | SPEF2                | Sperm flagellar 2                                              | 0.00                           | -2.5                               | -20.8                 | -8.2                                | ---             |

|       |              |              |            |                                                                                   |      |       |        |      |     |
|-------|--------------|--------------|------------|-----------------------------------------------------------------------------------|------|-------|--------|------|-----|
| 2_32  | gi_119920598 | XM_001249501 | LOC781114  | Hypothetical protein                                                              | 0.02 | -2.0  | -16.3  | -8.2 | --- |
| 2_33  | gi_31341796  | NM_174511    | CCL3       | Chemokine (c-c motif) ligand 3                                                    | 0.00 | -3.7  | -29.2  | -7.8 | ↑   |
| 2_34  | gi_119889183 | XR_028030    | LOC517126  | Similar to fc receptor-like 5                                                     | 0.00 | -3.9  | -30.0  | -7.8 | --- |
| 2_35  | gi_76672950  | XM_607792    | GAB2       | Grb2-associated binding protein 2                                                 | 0.00 | -2.6  | -20.1  | -7.8 | ↑   |
| 2_36  | gi_115496605 | NM_001076352 | LMO2       | Lim domain only 2 (rhombotin-like 1)                                              | 0.01 | -2.0  | -15.7  | -7.7 | ↑   |
| 2_37  | gi_119912910 | XM_599356    | FAM20A     | Family with sequence similarity 20, member a                                      | 0.00 | -2.8  | -21.3  | -7.7 | --- |
| 2_38  | gi_156120738 | NM_001102046 | POU6F2     | Pou class 6 homeobox 2                                                            | 0.00 | -2.9  | -22.4  | -7.7 | --- |
| 2_39  | gi_119918583 | XR_027958    | LOC531034  | Similar to synaptopodin 2-like                                                    | 0.00 | -2.3  | -17.6  | -7.6 | ↑   |
| 2_40  | gi_119905537 | XM_001253283 | LOC785870  | Similar to prodynorphin                                                           | 0.00 | -2.8  | -20.3  | -7.3 | --- |
| 2_41  | gi_156523111 | NM_001102500 | MMRN1      | Multimerin 1                                                                      | 0.00 | -3.1  | -21.8  | -7.0 | ↑   |
| 2_42  | gi_31342484  | NM_174258    | Cald1      | Caldesmon 1                                                                       | 0.00 | -4.6  | -31.7  | -6.9 | --- |
| 2_43  | gi_119910079 | XM_592529    | LPCAT2     | Lysophosphatidylcholine acyltransferase 2                                         | 0.01 | -2.2  | -14.7  | -6.8 | ↑   |
| 2_44  | gi_78050050  | NM_001035070 | ASB14      | Ankyrin repeat and socs box-containing 14                                         | 0.00 | -2.2  | -14.8  | -6.8 | ↑   |
| 2_45  | gi_119924763 | XM_601339    | PSD2       | Pleckstrin and sec7 domain containing 2                                           | 0.00 | -5.6  | -37.8  | -6.8 | --- |
| 2_46  | gi_119891244 | XR_028414    | C7orf58    | Chromosome 7 open reading frame 58                                                | 0.00 | -3.2  | -21.5  | -6.8 | ↑   |
| 2_47  | gi_119893188 | XM_608437    | LOC529975  | Hypothetical protein                                                              | 0.00 | -2.6  | -17.0  | -6.6 | --- |
| 2_48  | gi_115495262 | NM_001075943 | PEX5L      | Peroxisomal biogenesis factor 5-like                                              | 0.00 | -2.3  | -15.2  | -6.5 | --- |
| 2_49  | gi_119909623 | XM_871314    | LOC404062  | Immunoglobulin light chain vj region                                              | 0.00 | -4.8  | -30.8  | -6.4 | --- |
| 2_50  | gi_118150919 | NM_001077905 | CPA5       | Carboxypeptidase a5                                                               | 0.00 | -4.6  | -28.2  | -6.1 | --- |
| 2_51  | gi_119920009 | XM_601830    | NXF3       | Nuclear rna export factor 3                                                       | 0.00 | -27.3 | -166.5 | -6.1 | --- |
| 2_52  | gi_156121314 | NM_001102335 | PGM5       | Phosphoglucomutase 5                                                              | 0.00 | -8.5  | -50.8  | -6.0 | ↑   |
| 2_53  | gi_115496048 | NM_001075977 | GMPR       | Guanosine monophosphate reductase                                                 | 0.00 | -3.0  | -17.7  | -6.0 | --- |
| 2_54  | gi_32189337  | NM_174143    | PIGR       | Polymeric immunoglobulin receptor                                                 | 0.00 | -6.4  | -38.3  | -5.9 | ↑   |
| 2_55  | gi_119902288 | XM_001253077 | RASGRP1    | Ras guanyl releasing protein 1 (calcium and dag-regulated)                        | 0.00 | -2.4  | -14.3  | -5.9 | ↑   |
| 2_56  | gi_119900832 | XM_001249686 | LOC781282  | Similar to polydrom                                                               | 0.00 | -3.2  | -19.1  | -5.9 | --- |
| 2_57  | gi_148238272 | NM_001098016 | ITIH2      | Inter-alpha (globulin) inhibitor h2                                               | 0.00 | -5.3  | -30.8  | -5.9 | --- |
| 2_58  | gi_89886135  | NM_001013585 | S1PR1      | Sphingosine-1-phosphate receptor 1                                                | 0.00 | -9.4  | -54.6  | -5.8 | ↑   |
| 2_59  | gi_77404230  | NM_001034043 | Gulo       | Gulonolactone (l-) oxidase                                                        | 0.00 | -4.9  | -27.5  | -5.6 | --- |
| 2_60  | gi_122692374 | NM_001080353 | MGC148792  | Similar to elafin (MGC148792)                                                     | 0.00 | -3.6  | -19.0  | -5.3 | --- |
| 2_61  | gi_31341725  | NM_174538    | FCGR1A     | Fc fragment of igg, high affinity ia, receptor (CD64)                             | 0.00 | -2.5  | -12.8  | -5.2 | ↑   |
| 2_62  | gi_155372098 | NM_001101188 | ASB16      | Ankyrin repeat and socs box containing 16                                         | 0.00 | -5.1  | -25.2  | -5.0 | --- |
| 2_63  | gi_156523197 | NM_001102543 | DUSP27     | Dual specificity phosphatase 27 (putative)                                        | 0.00 | -4.6  | -22.7  | -5.0 | ↑   |
| 2_64  | gi_119927744 | XM_869472    | bTrappin-5 | Trappin 5 (btrappin-5)                                                            | 0.00 | -5.5  | -26.9  | -4.9 | --- |
| 2_65  | gi_158519866 | NM_001110070 | CTSW       | Cathepsin W                                                                       | 0.00 | -9.0  | -43.6  | -4.8 | --- |
| 2_66  | gi_156120752 | NM_001102053 | KANK4      | Kn motif and ankyrin repeat domains 4                                             | 0.00 | -2.8  | -13.6  | -4.8 | --- |
| 2_67  | gi_119910848 | XM_581838    | LOC505540  | Hypothetical protein                                                              | 0.00 | -5.7  | -27.2  | -4.8 | --- |
| 2_68  | gi_119894347 | XM_602917    | DOK7       | Docking protein 7                                                                 | 0.00 | -2.6  | -12.6  | -4.8 | --- |
| 2_69  | gi_119891299 | XM_607870    | LOC529423  | Similar to family with sequence similarity 40, member b                           | 0.00 | -4.4  | -21.0  | -4.7 | ↑   |
| 2_70  | gi_118151371 | NM_001078149 | GSTA3      | Glutathione s-transferase alpha 3                                                 | 0.00 | -10.0 | -46.9  | -4.7 | --- |
| 2_71  | gi_150247093 | NM_001099397 | GAPT       | Grb2-binding adaptor protein, transmembrane                                       | 0.00 | -2.5  | -11.5  | -4.7 | ↑   |
| 2_72  | gi_31343049  | NM_174010    | CD36       | CD36 molecule (thrombospondin receptor)                                           | 0.00 | -24.3 | -111.0 | -4.6 | ↑   |
| 2_73  | gi_76674996  | XM_603316    | XKRX       | Similar to membrane protein xplac                                                 | 0.00 | -5.9  | -26.7  | -4.6 | --- |
| 2_74  | gi_155372256 | NM_001101271 | FAM176B    | Family with sequence similarity 176, member b                                     | 0.00 | -6.6  | -30.0  | -4.5 | ↑   |
| 2_75  | gi_115495674 | NM_001076228 | PTPRG      | Protein tyrosine phosphatase, receptor type, g                                    | 0.00 | -2.5  | -11.4  | -4.5 | ↑   |
| 2_76  | gi_84370178  | NM_001038568 | GPR84      | G protein-coupled receptor 84                                                     | 0.00 | -4.1  | -18.1  | -4.5 | ↑   |
| 2_77  | gi_119903128 | XM_580552    | MERTK      | C-mer proto-oncogene tyrosine kinase                                              | 0.00 | -4.5  | -20.0  | -4.4 | --- |
| 2_78  | gi_119888204 | XM_595958    | DNAH7      | Dynein, axonemal, heavy chain 7                                                   | 0.00 | -2.8  | -11.9  | -4.3 | --- |
| 2_79  | gi_156120860 | NM_001102107 | CALCLRL    | Calcitonin receptor-like                                                          | 0.00 | -5.4  | -23.2  | -4.3 | --- |
| 2_80  | gi_115496321 | NM_001075915 | POU2AF1    | Pou class 2 associating factor 1                                                  | 0.00 | -2.4  | -10.1  | -4.3 | --- |
| 2_81  | gi_119904117 | XM_605012    | LCN2       | Lipocalin 2                                                                       | 0.00 | -6.1  | -25.6  | -4.2 | --- |
| 2_82  | gi_119904406 | XR_028798    | LOC536255  | Hypothetical protein                                                              | 0.00 | -2.5  | -10.1  | -4.0 | ↑   |
| 2_83  | gi_148540299 | NM_001098474 | EG667604   | Predicted gene 8721                                                               | 0.01 | -2.2  | -8.7   | -3.9 | ↑   |
| 2_84  | gi_126723450 | NM_001082467 | C6orf26    | Chromosome 6 open reading frame 26                                                | 0.00 | -2.7  | -9.9   | -3.7 | --- |
| 2_85  | gi_139948854 | NM_001083706 | PDGFD      | Platelet derived growth factor d                                                  | 0.00 | -2.6  | -9.5   | -3.7 | ↑   |
| 2_86  | gi_114050912 | NM_001046512 | TSPAN12    | Tetraspanin 12                                                                    | 0.00 | -8.2  | -29.9  | -3.6 | ↑   |
| 2_87  | gi_119918570 | XM_001252944 | CDH23      | Cadherin-related 23                                                               | 0.00 | -7.8  | -28.3  | -3.6 | --- |
| 2_88  | gi_115494983 | NM_001076301 | APOD       | Apolipoprotein d                                                                  | 0.00 | -2.8  | -10.1  | -3.6 | --- |
| 2_89  | gi_119894846 | XM_611456    | ARHGEF18   | Rho/rac guanine nucleotide exchange factor (GEF) 18                               | 0.00 | -3.1  | -11.2  | -3.6 | ↑   |
| 2_90  | gi_157428139 | NM_001105511 | RNASE2     | Ribonuclease, rnase a family, 2 (liver, eosinophil-derived neurotoxin)            | 0.00 | -10.0 | -34.8  | -3.5 | --- |
| 2_91  | gi_157074113 | NM_001103299 | PLS1       | Plastin 1                                                                         | 0.00 | -2.8  | -9.9   | -3.5 | --- |
| 2_92  | gi_118151317 | NM_001078121 | LOC768255  | Hypothetical protein                                                              | 0.00 | -2.2  | -7.7   | -3.4 | ↑   |
| 2_93  | gi_119904673 | XM_869410    | LOC617199  | Similar to atpase, aminophospholipid transporter-like, class i, type 8a, member 2 | 0.00 | -10.3 | -34.1  | -3.3 | --- |
| 2_94  | gi_119893582 | XM_599206    | SGMS2      | Sphingomyelin synthase 2                                                          | 0.00 | -2.9  | -9.7   | -3.3 | ↑   |
| 2_95  | gi_119920329 | XM_586812    | CACNA1F    | Calcium channel, voltage-dependent, l type, alpha 1f subunit                      | 0.00 | -3.2  | -10.4  | -3.3 | ↑   |
| 2_96  | gi_61888881  | NM_001013600 | BOLA-DOB   | Major histocompatibility complex, class II, do beta                               | 0.00 | -3.5  | -11.6  | -3.3 | ↑   |
| 2_97  | gi_149642786 | NM_001099152 | LBH        | Limb bud and heart development homolog (mouse)                                    | 0.00 | -2.9  | -9.6   | -3.3 | ↑   |
| 2_98  | gi_156120434 | NM_001101893 | ZNF423     | Zinc finger protein 423                                                           | 0.01 | -2.2  | -7.0   | -3.2 | --- |
| 2_99  | gi_110347592 | NM_001024505 |            | Engulfment and cell motility 1 (ELMO1), transcript variant 2                      | 0.01 | -2.1  | -6.9   | -3.2 | --- |
| 2_100 | gi_119917116 | XM_870165    | SH2B2      | Sh2b adaptor protein 2                                                            | 0.01 | -2.0  | -6.5   | -3.2 | --- |
| 2_101 | gi_31342006  | NM_174436    | Prkg1      | Protein kinase, cgmp-dependent, type 1                                            | 0.00 | -4.3  | -13.7  | -3.2 | --- |
| 2_102 | gi_119917849 | XM_607507    | PPAPDC1A   | Phosphatidic acid phosphatase type 2 domain containing 1a                         | 0.00 | -2.9  | -9.1   | -3.1 | ↑   |
| 2_103 | gi_119907018 | XM_866023    | C11orf52   | Chromosome 11 open reading frame 52                                               | 0.00 | -11.5 | -35.9  | -3.1 | ↑   |
| 2_104 | gi_115496130 | NM_001076499 | LOC390213  | Double c2-like domains, gamma, pseudogene                                         | 0.01 | -2.1  | -6.6   | -3.1 | ↑   |
| 2_105 | gi_119912938 | XR_028796    | LOC615883  | Similar to slit3                                                                  | 0.00 | -4.8  | -14.9  | -3.1 | --- |
| 2_106 | gi_119912710 | XR_028608    | LOC788092  | Similar to beta heavy chain of outer-arm axonemal dynein atpase                   | 0.00 | -2.4  | -7.3   | -3.1 | --- |
| 2_107 | gi_118151127 | NM_001078018 | SEZ6       | Seizure related 6 homolog (mouse)                                                 | 0.00 | -3.1  | -9.5   | -3.0 | --- |
| 2_108 | gi_119895258 | XR_028366    | LOC514894  | Hypothetical protein                                                              | 0.01 | -2.0  | -6.1   | -3.0 | ↑   |
| 2_109 | gi_156121258 | NM_001102307 | RGNEF      | 190 kda guanine nucleotide exchange factor                                        | 0.00 | -5.9  | -17.5  | -2.9 | --- |
| 2_110 | gi_31342140  | NM_174388    | MFAP2      | Microfibrillar-associated protein 2                                               | 0.00 | -7.7  | -22.5  | -2.9 | ↑   |
| 2_111 | gi_62751568  | NM_001015669 | DBC1       | Deleted in bladder cancer 1                                                       | 0.00 | -2.2  | -6.4   | -2.9 | ↑   |
| 2_112 | gi_119912178 | XM_612461    | ABCC3      | ATP-binding cassette, sub-family c (cftr/mrp), member 3                           | 0.00 | -2.3  | -6.8   | -2.9 | ↑   |
| 2_113 | gi_76638859  | XM_582510    | GPR81      | G protein-coupled receptor 81                                                     | 0.00 | -9.5  | -27.3  | -2.9 | --- |
| 2_114 | gi_110347586 | NM_001014879 | PPP2R2B    | Protein phosphatase 2, regulatory subunit b, beta                                 | 0.00 | -5.2  | -14.9  | -2.8 | --- |
| 2_115 | gi_119895769 | XM_617891    | EBF1       | Early b-cell factor 1                                                             | 0.00 | -3.4  | -9.5   | -2.8 | --- |
| 2_116 | gi_119913498 | XM_582218    | zo1        | Tight junction protein 1                                                          | 0.00 | -4.2  | -11.6  | -2.8 | --- |
| 2_117 | gi_119915518 | XM_608214    | LOC529757  | Similar to lymphotoxin-beta, transcript variant 1                                 | 0.00 | -6.8  | -18.6  | -2.7 | ↓   |
| 2_118 | gi_76638411  | XM_612023    | MBNL3      | Muscleblind-like 3 (drosophila)                                                   | 0.01 | -2.1  | -5.6   | -2.7 | ↑   |



|       |              |              |           |                                                                      |      |       |       |      |     |
|-------|--------------|--------------|-----------|----------------------------------------------------------------------|------|-------|-------|------|-----|
| 2_119 | gi_119908015 | XM_604649    | IL24      | Interleukin 24                                                       | 0.00 | -2.4  | -6.6  | -2.7 | --- |
| 2_120 | gi_156121118 | NM_001102237 | TMEM132A  | Transmembrane protein 132a                                           | 0.00 | -2.2  | -5.9  | -2.7 | --- |
| 2_121 | gi_119910909 | XM_870781    | KLK12     | Kallikrein-related peptidase 12                                      | 0.00 | -2.7  | -7.2  | -2.7 | --- |
| 2_122 | gi_119895214 | XM_867687    | PRR16     | Proline rich 16                                                      | 0.00 | -2.6  | -6.9  | -2.7 | --- |
| 2_123 | gi_66792889  | NM_001024553 | KCND1     | Potassium voltage-gated channel, shal-related subfamily, member 1    | 0.00 | -2.3  | -6.1  | -2.6 | ↑   |
| 2_124 | gi_119889656 | XM_001252338 | KIAA1324  | KIAA1324                                                             | 0.00 | -2.3  | -5.9  | -2.6 | --- |
| 2_125 | gi_31342494  | NM_174254    | CABP1     | Calcium binding protein 1                                            | 0.00 | -2.3  | -6.0  | -2.6 | --- |
| 2_126 | gi_62460475  | NM_001014892 | C16orf5   | Chromosome 16 open reading frame 5                                   | 0.01 | -2.1  | -5.4  | -2.5 | --- |
| 2_127 | gi_119891365 | XM_605871    | AGBL3     | Atp/gtp binding protein-like 3                                       | 0.01 | -2.2  | -5.5  | -2.5 | ↑   |
| 2_128 | gi_119931673 | XM_001249309 | SERINC2   | Serine incorporator 2                                                | 0.00 | -2.2  | -5.5  | -2.5 | ↑   |
| 2_129 | gi_119895089 | XM_001256303 | RAPGEF6   | Rap guanine nucleotide exchange factor (GEF) 6                       | 0.00 | -3.2  | -7.9  | -2.5 | --- |
| 2_130 | gi_119917978 | XM_591917    | C10orf92  | Chromosome 10 open reading frame 92                                  | 0.00 | -2.5  | -6.2  | -2.5 | --- |
| 2_131 | gi_119893204 | XM_001255230 | LOC788054 | Similar to bcl-rambo                                                 | 0.00 | -2.4  | -5.9  | -2.5 | ↑   |
| 2_132 | gi_119903859 | XM_613774    | DTNB      | Dystrobrevin, beta                                                   | 0.01 | -2.1  | -5.2  | -2.5 | ↑   |
| 2_133 | gi_119906935 | XM_586071    | TRPC6     | Transient receptor potential cation channel, subfamily c, member 6   | 0.00 | -2.9  | -7.0  | -2.5 | --- |
| 2_134 | gi_119891011 | XM_588627    | LRRN3     | Leucine rich repeat neuronal 3                                       | 0.00 | -4.3  | -10.7 | -2.5 | --- |
| 2_135 | gi_119913675 | XM_864691    | CPEB1     | Cytoplasmic polyadenylation element binding protein 1                | 0.00 | -2.2  | -5.5  | -2.4 | --- |
| 2_136 | gi_31342868  | NM_174091    | IL18      | Interleukin 18 (interferon-gamma-inducing factor)                    | 0.00 | -4.3  | -10.4 | -2.4 | ↑   |
| 2_137 | gi_119927615 | XM_001253466 | LOC785446 | Similar to ob-cadherin-1                                             | 0.00 | -23.5 | -57.1 | -2.4 | --- |
| 2_138 | gi_61675701  | NM_001013402 | SGCA      | Sarcoglycan, alpha (50kda dystrophin-associated glycoprotein)        | 0.00 | -3.1  | -7.4  | -2.4 | ↑   |
| 2_139 | gi_119908963 | XM_866831    | RNF150    | Ring finger protein 150                                              | 0.00 | -2.9  | -7.0  | -2.4 | ↑   |
| 2_140 | gi_156121234 | NM_001102295 | TM6SF1    | Transmembrane 6 superfamily member 1                                 | 0.00 | -2.2  | -5.3  | -2.4 | --- |
| 2_141 | gi_119894870 | XM_612193    | MYO1F     | Myosin if                                                            | 0.00 | -3.6  | -8.5  | -2.4 | ↑   |
| 2_142 | gi_77736358  | NM_001034707 | RGS5      | Regulator of g-protein signaling 5                                   | 0.00 | -3.6  | -8.5  | -2.4 | --- |
| 2_143 | gi_119894939 | XM_582663    | TBXA2R    | Thromboxane a2 receptor                                              | 0.00 | -5.8  | -13.7 | -2.4 | ↑   |
| 2_144 | gi_156120626 | NM_001101989 | TMEM144   | Transmembrane protein 144                                            | 0.00 | -5.7  | -13.5 | -2.4 | ↑   |
| 2_145 | gi_156120736 | NM_001102045 | FCRL1     | Fc receptor-like 1                                                   | 0.00 | -2.4  | -5.5  | -2.3 | ↑   |
| 2_146 | gi_119912092 | XM_595012    | IGF2BP1   | Insulin-like growth factor 2 mrna binding protein 1                  | 0.01 | -2.1  | -5.0  | -2.3 | --- |
| 2_147 | gi_119914721 | XM_601010    | LOC522724 | Similar to bassoon protein                                           | 0.01 | -2.1  | -4.9  | -2.3 | ↑   |
| 2_148 | gi_115495806 | NM_001076172 | MARCKS1L  | Marcks-like 1                                                        | 0.00 | -3.3  | -7.5  | -2.3 | --- |
| 2_149 | gi_119917956 | XR_028155    | LOC616097 | Hypothetical protein                                                 | 0.00 | -2.4  | -5.5  | -2.3 | --- |
| 2_150 | gi_119893202 | XM_870126    | CECR1     | Cat eye syndrome chromosome region, candidate 1                      | 0.00 | -2.7  | -6.2  | -2.3 | ↑   |
| 2_151 | gi_119920461 | XM_615546    | LOC541298 | Similar to interleukin 1 receptor accessory protein-like 1           | 0.01 | -2.0  | -4.7  | -2.3 | ↑   |
| 2_152 | gi_119886199 | XM_590382    | DZIP1L    | Daz interacting protein 1-like                                       | 0.00 | -3.9  | -8.9  | -2.3 | --- |
| 2_153 | gi_76681354  | XM_876891    | LOC510087 | Similar to loc508140, transcript variant 2                           | 0.01 | -2.1  | -4.7  | -2.2 | --- |
| 2_154 | gi_119912116 | XM_584605    | NGFR      | Nerve growth factor receptor                                         | 0.00 | -25.0 | -55.6 | -2.2 | --- |
| 2_155 | gi_119891420 | XM_597033    | SVOP1     | Svop-like                                                            | 0.00 | -9.8  | -21.7 | -2.2 | --- |
| 2_156 | gi_119909629 | XM_867430    | GGT1      | Gamma-glutamyltransferase 1                                          | 0.00 | -2.8  | -6.1  | -2.2 | --- |
| 2_157 | gi_156120476 | NM_001101914 | NINJ2     | Ninjurin 2                                                           | 0.00 | -4.0  | -8.7  | -2.2 | --- |
| 2_158 | gi_119912285 | XM_870899    | RAPGEFL1  | Rap guanine nucleotide exchange factor (gef)-like 1                  | 0.00 | -2.4  | -5.2  | -2.2 | --- |
| 2_159 | gi_119890374 | XM_594566    | KLF17     | Kruppel-like factor 17                                               | 0.00 | -2.9  | -6.4  | -2.2 | --- |
| 2_160 | gi_99028972  | NM_174195    | TCN2      | Transcobalamin ii                                                    | 0.01 | -2.1  | -4.6  | -2.2 | ↑   |
| 2_161 | gi_62460541  | NM_001014923 | NFE2      | Nuclear factor (erythroid-derived 2), 45kda                          | 0.00 | -20.7 | -44.5 | -2.2 | --- |
| 2_162 | gi_118150847 | NM_001077867 | OSTBETA   | Organic solute transporter beta                                      | 0.00 | -6.9  | -14.8 | -2.1 | ↑   |
| 2_163 | gi_110626118 | NM_001040495 | IGFBP6    | Insulin-like growth factor binding protein 6                         | 0.00 | -2.9  | -6.2  | -2.1 | --- |
| 2_164 | gi_77735824  | NM_001034435 | CTSK      | Cathepsin k                                                          | 0.00 | -3.7  | -7.9  | -2.1 | ↑   |
| 2_165 | gi_115495086 | NM_001075767 | ATP2A1    | Atpase, ca <sup>++</sup> transporting, cardiac muscle, fast twitch 1 | 0.00 | -2.4  | -5.1  | -2.1 | --- |
| 2_166 | gi_122692514 | NM_001080250 | AMICA1    | Adhesion molecule, interacts with cxadr antigen 1                    | 0.00 | -2.2  | -4.7  | -2.1 | ↑   |
| 2_167 | gi_164448627 | NM_001015642 | CPXM      | Carboxypeptidase x                                                   | 0.00 | -4.8  | -10.1 | -2.1 | --- |
| 2_168 | gi_154152128 | NM_001100334 | AFAP1L1   | Actin filament associated protein 1-like 1                           | 0.00 | -3.0  | -6.3  | -2.1 | --- |
| 2_169 | gi_115496685 | NM_001075325 | FOLR2     | Folate receptor 2 (fetal)                                            | 0.00 | -2.9  | -6.1  | -2.1 | ↑   |
| 2_170 | gi_155371954 | NM_001101113 | GPX7      | Glutathione peroxidase 7                                             | 0.01 | -2.1  | -4.4  | -2.1 | --- |
| 2_171 | gi_149642888 | NM_001099151 | LHFP12    | Lipoma hmgic fusion partner-like 2                                   | 0.00 | -2.5  | -5.1  | -2.0 | ↑   |
| 2_172 | gi_112817614 | NM_001037478 | ABCG2     | ATP-binding cassette, sub-family g (white), member 2                 | 0.00 | -2.9  | -6.0  | -2.0 | ↑   |
| 2_173 | gi_115495372 | NM_001076284 | PCBP3     | Poly(rc) binding protein 3                                           | 0.00 | -2.7  | -5.4  | -2.0 | --- |
| 2_174 | gi_119895827 | XM_001250068 | ADRA1B    | Adrenergic, alpha-1b-, receptor                                      | 0.00 | -2.6  | -5.4  | -2.0 | ↑   |
| 2_175 | gi_134085895 | NM_001083469 | TMEM156   | Transmembrane protein 156                                            | 0.00 | -4.5  | -9.2  | -2.0 | ↑   |
| 2_176 | gi_119912559 | XM_586841    | LOC509801 | Similar to IG-beta                                                   | 0.00 | -2.3  | -4.6  | -2.0 | --- |
| 2_177 | gi_155371996 | NM_001101135 | PAQR8     | Progesterin and adipoq receptor family member viii                   | 0.00 | -2.5  | -5.1  | -2.0 | --- |
| 2_178 | gi_28849942  | NM_174776    | TAP       | Tracheal antimicrobial peptide                                       | 0.01 | -2.0  | -4.1  | -2.0 | --- |
| 2_179 | gi_148356245 | NM_001098380 | HSPB2     | Heat shock 27kda protein 2                                           | 0.01 | -2.1  | -4.2  | -2.0 | --- |
| 2_180 | gi_157279838 | NM_001104964 | ART5      | Adp-ribosyltransferase 5                                             | 0.00 | -7.6  | -15.2 | -2.0 | ↑   |

### Supplementary data table 3 Full list of genes in profile 3 (n = 154)

| Profile_ S. No | SEQ. ID      | Acc. No. (RefSeq) | Putative Gene symbol | Gene Name                                                                    | BL20 LPS Vs BL20 FDR (4h/or18) | BL20 LPS Vs BL20 Abs: FC (4h/or18) | TBL20 Vs BL20 Abs: FC | TBL20 Vs BL20 LPS Abs: FC (4h/or18) | BW720c Response |
|----------------|--------------|-------------------|----------------------|------------------------------------------------------------------------------|--------------------------------|------------------------------------|-----------------------|-------------------------------------|-----------------|
| 3_1            | gi_114050822 | NM_001046464      | MPEG1                | Macrophage expressed 1                                                       | 0.00                           | 79.8                               | -5.6                  | -449.4                              | ↑               |
| 3_2            | gi_31343308  | NM_173902         | CLU                  | Clusterin                                                                    | 0.00                           | 8.9                                | -31.7                 | -280.7                              | ---             |
| 3_3            | gi_60592981  | NM_001012678      | BOLA-DYA             | Major histocompatibility complex, class ii, dy alpha (bola-dya)              | 0.00                           | 27.4                               | -4.8                  | -132.1                              | ↑               |
| 3_4            | gi_119901378 | XM_611161         | EPHA7                | Eph receptor a7                                                              | 0.00                           | 4.6                                | -26.0                 | -120.1                              | ---             |
| 3_5            | gi_119919728 | XR_028639         | LOC535439            | Hypothetical protein                                                         | 0.00                           | 3.4                                | -33.9                 | -115.3                              | ↑               |
| 3_6            | gi_41386773  | NM_174090         | IL15                 | Interleukin 15                                                               | 0.00                           | 5.7                                | -18.9                 | -107.3                              | ---             |
| 3_7            | gi_119904381 | XM_001256288      | ABO                  | Abo blood group (transferase a, alpha 1-3-n-acetylgalactosaminyltransferase) | 0.00                           | 2.8                                | -35.5                 | -100.0                              | ---             |
| 3_8            | gi_31340694  | NM_174703         | TNXB                 | Tenascin Xb                                                                  | 0.00                           | 6.6                                | -11.8                 | -78.0                               | ---             |
| 3_9            | gi_119896111 | XM_593744         | C8orf80              | Chromosome 8 open reading frame 80                                           | 0.02                           | 2.0                                | -32.4                 | -65.1                               | ↑               |

|      |              |              |              |                                                                               |      |      |       |       |     |
|------|--------------|--------------|--------------|-------------------------------------------------------------------------------|------|------|-------|-------|-----|
| 3_10 | gi_41386684  | NM_174196    | THBS1        | Thrombospondin 1                                                              | 0.00 | 2.5  | -25.7 | -65.0 | --- |
| 3_11 | gi_119908116 | XM_864590    | RGS18        | Regulator of g-protein signaling 18                                           | 0.00 | 29.2 | -2.2  | -63.3 | --- |
| 3_12 | gi_75832075  | NM_175773    | IGJ          | Immunoglobulin j polypeptide                                                  | 0.00 | 2.9  | -20.3 | -58.1 | ↑   |
| 3_13 | gi_119891985 | XM_596354    | PLXNC1       | Plexin C1                                                                     | 0.00 | 2.6  | -19.4 | -50.5 | ↑   |
| 3_14 | gi_78369299  | NM_001035404 | SAMSN1       | Sam domain, sh3 domain and nuclear localization signals 1                     | 0.00 | 4.5  | -10.2 | -46.2 | ↑   |
| 3_15 | gi_119910850 | XM_869691    | RASIP1       | Ras interacting protein 1                                                     | 0.00 | 5.4  | -8.5  | -46.0 | ↑   |
| 3_16 | gi_115497721 | NM_001075231 | PDGFA        | Platelet-derived growth factor alpha polypeptide                              | 0.00 | 18.0 | -2.5  | -44.7 | --- |
| 3_17 | gi_118150845 | NM_001077868 | STAP1        | Signal transducing adaptor family member 1                                    | 0.02 | 2.1  | -21.2 | -43.8 | ↑   |
| 3_18 | gi_76628966  | XM_588243    | CD207        | CD207 molecule, Langerin                                                      | 0.00 | 3.8  | -11.3 | -42.9 | ↑   |
| 3_19 | gi_119892202 | XM_586498    | WNT10B       | Wingless-type MMTV integration site family, member 10B                        | 0.00 | 10.3 | -4.2  | -42.6 | ↑   |
| 3_20 | gi_62751708  | NM_001015520 | LASS4        | Lag1 homolog, ceramide synthase 4                                             | 0.00 | 9.2  | -4.3  | -39.9 | ↑   |
| 3_21 | gi_119879508 | XM_617543    | CD80         | CD80 molecule                                                                 | 0.00 | 13.4 | -2.8  | -37.9 | ↑   |
| 3_22 | gi_31340626  | NM_174725    | EPAS1        | Endothelial pas domain protein 1                                              | 0.00 | 12.0 | -2.9  | -35.2 | ↑   |
| 3_23 | gi_150247135 | NM_001099374 | CD200R1      | CD200 receptor 1                                                              | 0.00 | 8.3  | -4.2  | -34.6 | --- |
| 3_24 | gi_76668819  | XM_864611    | SIM1         | Single-minded homolog 1 (drosophila)                                          | 0.00 | 6.7  | -4.9  | -33.2 | ↑   |
| 3_25 | gi_115494923 | NM_001075952 | ASGR2        | Asialoglycoprotein receptor 2                                                 | 0.00 | 3.4  | -9.7  | -32.7 | ↑   |
| 3_26 | gi_119894218 | XM_608086    | LOC529634    | Similar to mist                                                               | 0.00 | 3.4  | -9.5  | -32.2 | ↑   |
| 3_27 | gi_119904441 | XM_580490    | KBTBD6       | Kelch repeat and btb (poz) domain containing 6                                | 0.00 | 10.3 | -3.0  | -30.4 | --- |
| 3_28 | gi_119916402 | XM_580886    | CCDC68       | Coiled-coil domain containing 68                                              | 0.00 | 5.7  | -5.0  | -28.1 | ↑   |
| 3_29 | gi_94966920  | NM_001040563 | HTATIP2      | Hiv-1 tat interactive protein 2, 30kda                                        | 0.00 | 6.5  | -4.3  | -27.9 | --- |
| 3_30 | gi_149642680 | NM_001098991 | FGR          | Gardner-rasheed feline sarcoma viral (v-fgr) oncogene homolog                 | 0.00 | 3.9  | -7.1  | -27.6 | ↑   |
| 3_31 | gi_78369443  | NM_001035293 | BIRC3        | Baculoviral iap repeat containing 3                                           | 0.00 | 5.8  | -4.5  | -26.1 | --- |
| 3_32 | gi_119910918 | XM_869891    | SIGLEC10     | Sialic acid binding ig-like lectin 10                                         | 0.00 | 2.7  | -9.4  | -25.4 | --- |
| 3_33 | gi_77736010  | NM_001034532 | PYROXD2      | Pyridine nucleotide-disulphide oxidoreductase domain 2                        | 0.00 | 7.2  | -3.2  | -23.4 | --- |
| 3_34 | gi_119915684 | XM_863936    | UBD          | Ubiquitin d                                                                   | 0.00 | 9.6  | -2.4  | -22.8 | ↑   |
| 3_35 | gi_89886136  | NM_001014870 | TMEM106A     | Transmembrane protein 106a                                                    | 0.00 | 2.1  | -10.5 | -22.2 | ↑   |
| 3_36 | gi_119934649 | XM_001256269 | LOC789535    | Similar to vasoactive intestinal peptide receptor 2                           | 0.00 | 2.4  | -8.9  | -21.5 | --- |
| 3_37 | gi_119901653 | XM_604128    | PLEKHG1      | Pleckstrin homology domain containing, family g (with RHOGEF domain) member 1 | 0.00 | 2.1  | -10.3 | -21.5 | --- |
| 3_38 | gi_41386777  | NM_174115    | MUC1         | Mucin 1, cell surface associated                                              | 0.00 | 10.2 | -2.1  | -21.2 | --- |
| 3_39 | gi_119903737 | XM_596854    | PLEK         | Pleckstrin                                                                    | 0.00 | 5.6  | -3.7  | -20.3 | ↑   |
| 3_40 | gi_162287249 | NM_001075475 | ADAM19       | Adam metalloproteinase domain 19                                              | 0.00 | 3.0  | -6.6  | -19.8 | --- |
| 3_41 | gi_119890722 | XM_592017    | SAMD9        | Sterile alpha motif domain containing 9                                       | 0.00 | 7.2  | -2.8  | -19.8 | ↑   |
| 3_42 | gi_119904782 | XM_868438    | KCTD12       | Potassium channel tetramerisation domain containing 12                        | 0.00 | 5.7  | -3.4  | -19.5 | ↑   |
| 3_43 | gi_119906769 | XM_001250623 | TP53INP1     | Tumor protein p53 inducible nuclear protein 1                                 | 0.00 | 2.3  | -8.3  | -18.9 | ↑   |
| 3_44 | gi_119887080 | XM_584543    | ICOSLG       | Inducible t-cell co-stimulator ligand                                         | 0.00 | 3.8  | -4.9  | -18.9 | ↑   |
| 3_45 | gi_119905627 | XM_606839    | NTSR1        | Neurotensin receptor 1 (high affinity)                                        | 0.00 | 6.6  | -2.8  | -18.1 | --- |
| 3_46 | gi_156120748 | NM_001102051 | TXLNB        | Taxilin beta                                                                  | 0.00 | 8.5  | -2.0  | -17.3 | --- |
| 3_47 | gi_119906824 | XM_001251675 | LOC784120    | Hypothetical protein                                                          | 0.00 | 3.5  | -4.9  | -17.3 | ↑   |
| 3_48 | gi_119920140 | XM_001251153 | LOC782514    | Hypothetical protein                                                          | 0.00 | 8.3  | -2.1  | -17.1 | --- |
| 3_49 | gi_77735736  | NM_001034391 | LRRC33       | Leucine rich repeat containing 33                                             | 0.00 | 2.2  | -7.7  | -16.7 | ↑   |
| 3_50 | gi_119906373 | XM_594631    | KLHL38       | Kelch-like 38 (drosophila)                                                    | 0.00 | 4.5  | -3.7  | -16.7 | ↑   |
| 3_51 | gi_139948810 | NM_001083735 | TRIM2        | Tripartite motif containing 2                                                 | 0.00 | 5.6  | -3.0  | -16.6 | --- |
| 3_52 | gi_119909414 | XM_590469    | RASAL1       | Ras protein activator like 1 (gap1 like)                                      | 0.00 | 8.1  | -2.0  | -16.5 | --- |
| 3_53 | gi_119918508 | XR_027379    | MYPN         | Myopalladin                                                                   | 0.00 | 3.5  | -4.7  | -16.4 | --- |
| 3_54 | gi_119887502 | XR_027685    | LOC540561    | Similar to titin (connectin) (rhabdomyosarcoma antigen m-rms-40.14)           | 0.02 | 2.1  | -7.6  | -16.2 | ↑   |
| 3_55 | gi_119893129 | XM_867752    | PRMT8        | Protein arginine methyltransferase 8                                          | 0.00 | 6.7  | -2.4  | -16.1 | --- |
| 3_56 | gi_119887408 | XR_028509    | LOC787276    | Hypothetical protein                                                          | 0.00 | 2.4  | -6.6  | -15.9 | --- |
| 3_57 | gi_60592983  | NM_001012679 | BOLA-DYB     | Major histocompatibility complex, class ii, dy beta (bola-dyb)                | 0.00 | 5.9  | -2.7  | -15.7 | --- |
| 3_58 | gi_116004198 | NM_001076987 | PLAC8        | Placenta-specific 8                                                           | 0.00 | 3.4  | -4.5  | -15.3 | ↑   |
| 3_59 | gi_119879546 | XM_001251104 | PARP14       | Poly (adp-ribose) polymerase family, member 14                                | 0.00 | 3.2  | -4.6  | -14.6 | ↑   |
| 3_60 | gi_148236122 | NM_001098043 | CLMP         | Cxadr-like membrane protein                                                   | 0.00 | 4.5  | -3.2  | -14.5 | --- |
| 3_61 | gi_114050810 | NM_001046507 | EAF2         | E1f associated factor 2                                                       | 0.00 | 3.7  | -3.8  | -14.1 | --- |
| 3_62 | gi_119927163 | XM_001249585 | LOC783074    | Hypothetical protein                                                          | 0.00 | 3.8  | -3.6  | -13.7 | ↑   |
| 3_63 | gi_156121166 | NM_001102261 | GBP4         | Guanylate binding protein 4                                                   | 0.00 | 2.8  | -4.8  | -13.5 | ↑   |
| 3_64 | gi_125991949 | NM_001081581 | ABAT         | 4-aminobutyrate aminotransferase                                              | 0.00 | 6.3  | -2.1  | -13.5 | --- |
| 3_65 | gi_114052742 | NM_001045877 | BMP4         | Bone morphogenetic protein 4                                                  | 0.00 | 3.0  | -4.2  | -12.4 | --- |
| 3_66 | gi_119910364 | XM_583222    | KIRREL2      | Kin of irrel like 2 (drosophila)                                              | 0.00 | 3.4  | -3.4  | -11.9 | --- |
| 3_67 | gi_119907584 | XM_867197    | FCHSD2       | Fch and double sh3 domains 2                                                  | 0.00 | 2.9  | -4.1  | -11.8 | ↑   |
| 3_68 | gi_84370132  | NM_001038554 | ADPRH        | Adp-ribosylarginine hydrolase                                                 | 0.00 | 2.1  | -5.6  | -11.8 | ↑   |
| 3_69 | gi_76642926  | XM_600064    | SLFN11       | Schlafen family member 11                                                     | 0.00 | 2.9  | -4.0  | -11.8 | ↑   |
| 3_70 | gi_156121204 | NM_001102280 | GAS7         | Growth arrest-specific 7                                                      | 0.00 | 2.1  | -5.6  | -11.6 | --- |
| 3_71 | gi_157279976 | NM_001105034 | GIMAP7       | Gtpase, imap family member 7                                                  | 0.00 | 4.4  | -2.6  | -11.4 | --- |
| 3_72 | gi_119913163 | XM_001253420 | LOC785366    | Similar to embigin homolog (mouse)                                            | 0.01 | 2.2  | -5.2  | -11.3 | ↑   |
| 3_73 | gi_119917968 | XM_866446    | JAKMIP3      | Janus kinase and microtubule interacting protein 3                            | 0.02 | 2.1  | -5.3  | -10.8 | ↑   |
| 3_74 | gi_62751902  | NM_001015610 | PLA1A        | Phospholipase a1 member a                                                     | 0.00 | 5.1  | -2.1  | -10.7 | --- |
| 3_75 | gi_75832127  | NM_001025326 | SRGN         | Serglycin (srgn)                                                              | 0.00 | 4.6  | -2.3  | -10.6 | --- |
| 3_76 | gi_45430044  | NM_205812    | PKIG         | Protein kinase (camp-dependent, catalytic) inhibitor gamma                    | 0.00 | 4.2  | -2.5  | -10.6 | --- |
| 3_77 | gi_115496411 | NM_001075349 | CHN1         | Chimerin (chimaerin) 1                                                        | 0.00 | 3.2  | -3.3  | -10.6 | ↑   |
| 3_78 | gi_155371902 | NM_001101086 | CPD          | Carboxypeptidase d                                                            | 0.00 | 3.8  | -2.8  | -10.5 | --- |
| 3_79 | gi_119921604 | XM_001250189 | GBP2         | Guanylate binding protein 2, interferon-inducible                             | 0.01 | 2.1  | -5.1  | -10.5 | ↑   |
| 3_80 | gi_31341685  | NM_174553    | IFNAR2       | Interferon (alpha, beta and omega) receptor 2                                 | 0.00 | 4.6  | -2.3  | -10.5 | --- |
| 3_81 | gi_114050846 | NM_001046461 | TRIM6-TRIM34 | Trim6-trim34 readthrough                                                      | 0.00 | 2.1  | -4.9  | -10.4 | ↑   |
| 3_82 | gi_119911048 | XM_602125    | PRKCG        | Protein kinase c, gamma                                                       | 0.00 | 2.9  | -3.6  | -10.4 | --- |
| 3_83 | gi_114050784 | NM_001046002 | CD48         | CD48 molecule                                                                 | 0.00 | 4.2  | -2.5  | -10.3 | ↑   |
| 3_84 | gi_61870087  | XM_588576    | PCDHGA5      | Protocadherin gamma subfamily a, 5                                            | 0.01 | 2.2  | -4.7  | -10.1 | ↑   |
| 3_85 | gi_156120712 | NM_001102033 | SGK1         | Serum/glucocorticoid regulated kinase 1                                       | 0.00 | 4.3  | -2.3  | -9.9  | --- |
| 3_86 | gi_115496777 | NM_001076371 | SEPT5        | Septin 5                                                                      | 0.00 | 2.6  | -3.9  | -9.9  | ↑   |
| 3_87 | gi_119911648 | XM_001251943 | LOC783305    | Similar to tnfr receptor-associated factor 4                                  | 0.00 | 3.7  | -2.6  | -9.8  | --- |
| 3_88 | gi_119894894 | XM_600015    | TNFSF9       | Tumor necrosis factor (ligand) superfamily, member 9                          | 0.00 | 2.3  | -4.1  | -9.7  | --- |
| 3_89 | gi_119888895 | XM_581276    | UBXN10       | Ubx domain protein 10                                                         | 0.00 | 2.5  | -3.9  | -9.6  | --- |
| 3_90 | gi_156120916 | NM_001102135 | LAMP3        | Lysosomal-associated membrane protein 3                                       | 0.00 | 2.8  | -3.4  | -9.4  | ↑   |
| 3_91 | gi_119914719 | XM_001254179 | CDHR4        | Cadherin-related family member 4                                              | 0.00 | 2.4  | -3.8  | -9.3  | --- |
| 3_92 | gi_31342628  | NM_174190    | SVIL         | Supervillin                                                                   | 0.00 | 4.1  | -2.3  | -9.2  | --- |
| 3_93 | gi_139949110 | NM_001083769 | IRF8         | Interferon regulatory factor 8                                                | 0.00 | 2.4  | -3.7  | -8.8  | ↓   |
| 3_94 | gi_119925221 | XM_001254480 | LOC614260    | Similar to zinc finger protein 75                                             | 0.00 | 3.1  | -2.8  | -8.7  | --- |
| 3_95 | gi_31343026  | NM_174020    | LYST         | Lysosomal trafficking regulator                                               | 0.00 | 2.2  | -3.8  | -8.6  | --- |

|       |              |              |            |                                                                               |      |     |      |      |     |
|-------|--------------|--------------|------------|-------------------------------------------------------------------------------|------|-----|------|------|-----|
| 3_96  | gi_164450480 | NM_001113277 | KNG1       | Kininogen 1                                                                   | 0.01 | 2.1 | -4.1 | -8.4 | ↑   |
| 3_97  | gi_115495496 | NM_001076276 | MARCKS     | Myristoylated alanine-rich protein kinase c substrate                         | 0.00 | 3.8 | -2.2 | -8.3 | --- |
| 3_98  | gi_119889728 | XM_001254754 | LOC787315  | Similar to vav 3 oncogene                                                     | 0.00 | 2.3 | -3.6 | -8.3 | --- |
| 3_99  | gi_119915696 | XM_870260    | BTN2A2     | Butyrophilin, subfamily 2, member a2                                          | 0.00 | 3.2 | -2.5 | -8.2 | --- |
| 3_100 | gi_156120442 | NM_001101897 | KIAA0226   | KIAA0226                                                                      | 0.00 | 3.0 | -2.7 | -8.2 | --- |
| 3_101 | gi_119909598 | XM_001256017 | LOC789191  | Similar to mgc127066 protein                                                  | 0.00 | 3.6 | -2.2 | -8.0 | --- |
| 3_102 | gi_116004060 | NM_001076918 | TLR10      | Toll-like receptor 10                                                         | 0.00 | 3.5 | -2.3 | -8.0 | --- |
| 3_103 | gi_119891152 | XM_594668    | MYO1G      | Myosin IG                                                                     | 0.00 | 2.6 | -3.0 | -8.0 | --- |
| 3_104 | gi_119895312 | XM_866364    | OR2G3      | Olfactory receptor, family 2, subfamily g, member 3                           | 0.00 | 3.5 | -2.2 | -7.8 | --- |
| 3_105 | gi_76678805  | XM_586049    | LOC509148  | Similar to clll7 protein                                                      | 0.00 | 3.1 | -2.5 | -7.7 | --- |
| 3_106 | gi_115496207 | XM_001075746 | GBP5       | Guanylate binding protein 5                                                   | 0.00 | 3.4 | -2.2 | -7.6 | --- |
| 3_107 | gi_119910891 | XM_870599    | LOC618268  | Similar to CD33L1                                                             | 0.00 | 2.3 | -3.3 | -7.5 | --- |
| 3_108 | gi_62751495  | NM_001015680 | NAPEPLD    | N-acyl phosphatidylethanolamine phospholipase d                               | 0.00 | 2.6 | -2.9 | -7.5 | ↑   |
| 3_109 | gi_115495090 | NM_001075392 | ANKRD37    | Ankyrin repeat domain 37                                                      | 0.00 | 2.5 | -3.0 | -7.5 | --- |
| 3_110 | gi_114052650 | NM_001046309 | BAMBI      | BMP and activin membrane-bound inhibitor homolog (xenopus laevis)             | 0.00 | 3.5 | -2.1 | -7.2 | --- |
| 3_111 | gi_119907378 | XM_864679    | LOC516599  | Similar to tripartite motif protein trim5, transcript variant 2               | 0.01 | 2.2 | -3.2 | -7.1 | ↑   |
| 3_112 | gi_119919105 | XM_001254753 | GPR44      | G protein-coupled receptor 44                                                 | 0.02 | 2.0 | -3.4 | -6.9 | --- |
| 3_113 | gi_115496154 | NM_001075480 | C11H2orf50 | Chromosome 2 open reading frame 50 ortholog                                   | 0.00 | 2.6 | -2.6 | -6.9 | --- |
| 3_114 | gi_155371870 | NM_001101070 | FAM117A    | Family with sequence similarity 117, member a                                 | 0.00 | 2.2 | -3.1 | -6.8 | --- |
| 3_115 | gi_31343630  | NM_177523    | SOCS2      | Suppressor of cytokine signaling 2                                            | 0.00 | 2.5 | -2.7 | -6.8 | --- |
| 3_116 | gi_116003948 | NM_001076862 | SNX29      | Sorting nexin 29                                                              | 0.00 | 3.3 | -2.1 | -6.7 | --- |
| 3_117 | gi_156121170 | NM_001102263 | GRAMD4     | Gram domain containing 4                                                      | 0.00 | 3.2 | -2.1 | -6.7 | --- |
| 3_118 | gi_118150825 | NM_001077856 | LY6G6C     | Lymphocyte antigen 6 complex, locus g6c                                       | 0.01 | 2.1 | -3.2 | -6.6 | --- |
| 3_119 | gi_114052363 | NM_001046345 | IKBKE      | Inhibitor of kappa light polypeptide gene enhancer in b-cells, kinase epsilon | 0.01 | 2.1 | -3.1 | -6.5 | --- |
| 3_120 | gi_164518975 | NM_001113301 | SERF1B     | Small edrk-rich factor 1b (centromeric)                                       | 0.00 | 2.5 | -2.6 | -6.5 | --- |
| 3_121 | gi_126722664 | NM_001082452 | PARP11     | Poly (adp-ribose) polymerase family, member 11                                | 0.00 | 2.5 | -2.6 | -6.4 | ↑   |
| 3_122 | gi_119879516 | XM_593520    | ARHGAP31   | Rho gtpase activating protein 31                                              | 0.00 | 2.3 | -2.8 | -6.4 | --- |
| 3_123 | gi_115496919 | NM_001075675 | FABP6      | Fatty acid binding protein 6, ileal                                           | 0.00 | 2.5 | -2.6 | -6.4 | --- |
| 3_124 | gi_119893047 | XM_613380    | CD163      | CD163 molecule                                                                | 0.01 | 2.1 | -3.0 | -6.4 | ↑   |
| 3_125 | gi_114053094 | NM_001046256 | MTMR9      | Myotubularin related protein 9                                                | 0.00 | 2.4 | -2.7 | -6.3 | ↑   |
| 3_126 | gi_119912528 | XM_616376    | ITGB3      | Integrin, beta 3 (platelet glycoprotein iiiia, antigen Cd61)                  | 0.00 | 2.6 | -2.5 | -6.3 | ↑   |
| 3_127 | gi_119908832 | XR_027675    | LOC531974  | Similar to mkiaa1151 protein                                                  | 0.01 | 2.2 | -2.8 | -6.1 | --- |
| 3_128 | gi_76659540  | XM_864058    | LOC613370  | Similar to HMGB3 protein                                                      | 0.00 | 3.0 | -2.0 | -6.0 | --- |
| 3_129 | gi_115495920 | NM_001075138 | RTN4       | Reticulon 4 (RTN4), transcript variant 1                                      | 0.00 | 3.0 | -2.0 | -6.0 | ↑   |
| 3_130 | gi_119934667 | XM_001256326 | LOC789628  | Hypothetical protein                                                          | 0.00 | 2.8 | -2.1 | -6.0 | --- |
| 3_131 | gi_119915594 | XM_606763    | LOC528343  | Similar to olfactory receptor mor256-5                                        | 0.00 | 2.5 | -2.4 | -6.0 | ↑   |
| 3_132 | gi_166159169 | NM_001114080 |            | Protocadherin gamma subfamily c, 3 (pcdhgc3), transcript variant 1            | 0.02 | 2.0 | -2.9 | -5.9 | ↑   |
| 3_133 | gi_119901056 | XM_610591    | LOC532081  | Hypothetical protein                                                          | 0.00 | 2.4 | -2.4 | -5.8 | ↑   |
| 3_134 | gi_119915604 | XM_589001    | LOC511626  | Similar to olfactory receptor, family 2, subfamily j, member 3                | 0.00 | 2.5 | -2.3 | -5.8 | ↑   |
| 3_135 | gi_77735772  | NM_001034409 | EEPD1      | Endonuclease/exonuclease/phosphatase family domain containing 1               | 0.00 | 2.3 | -2.5 | -5.8 | --- |
| 3_136 | gi_119915602 | XM_001253092 | Olf1r129   | Olfactory receptor 129                                                        | 0.01 | 2.4 | -2.4 | -5.7 | ↑   |
| 3_137 | gi_119895959 | XM_613847    | RGMB       | Rgm domain family, member b                                                   | 0.00 | 2.1 | -2.7 | -5.6 | --- |
| 3_138 | gi_119905278 | XM_601498    | CUBN       | Cubilin (intrinsic factor-cobalamin receptor)                                 | 0.00 | 2.7 | -2.0 | -5.5 | --- |
| 3_139 | gi_125991875 | NM_001081602 | STK38      | Serine/threonine kinase 38                                                    | 0.02 | 2.0 | -2.7 | -5.5 | --- |
| 3_140 | gi_119889385 | XM_590074    | RFX5       | Regulatory factor x, 5 (influences hla class ii expression)                   | 0.00 | 2.1 | -2.5 | -5.4 | --- |
| 3_141 | gi_119879413 | XM_001251003 | LOC782355  | Hypothetical protein                                                          | 0.01 | 2.3 | -2.3 | -5.3 | --- |
| 3_142 | gi_77736300  | NM_001034678 | HES1       | Hairy and enhancer of split 1, (drosophila)                                   | 0.00 | 2.1 | -2.5 | -5.2 | ↑   |
| 3_143 | gi_166157485 | NM_001113762 | ICAM5      | Intercellular adhesion molecule 5, telencephalin                              | 0.00 | 2.5 | -2.1 | -5.2 | --- |
| 3_144 | gi_119903011 | XM_580522    | RPS6KA5    | Ribosomal protein s6 kinase, 90kda, polypeptide 5                             | 0.01 | 2.0 | -2.6 | -5.2 | --- |
| 3_145 | gi_119902242 | XM_001253748 | Olf1r49    | Olfactory receptor 49                                                         | 0.02 | 2.1 | -2.5 | -5.2 | --- |
| 3_146 | gi_119934357 | XM_001254441 | LOC786885  | Similar to glucose transporter 5                                              | 0.00 | 2.3 | -2.2 | -5.1 | ↑   |
| 3_147 | gi_119934023 | XM_001257056 | LOC790637  | Hypothetical protein                                                          | 0.00 | 2.3 | -2.2 | -5.1 | --- |
| 3_148 | gi_156121152 | NM_001102254 | NCOA7      | Nuclear receptor coactivator 7                                                | 0.00 | 2.1 | -2.4 | -5.0 | --- |
| 3_149 | gi_157073983 | NM_001103231 | MEF2B      | Myocyte enhancer factor 2b                                                    | 0.01 | 2.0 | -2.5 | -5.0 | --- |
| 3_150 | gi_115497499 | NM_001075894 | CDKN2B     | Cyclin-dependent kinase inhibitor 2b (p15, inhibits cdk4)                     | 0.01 | 2.1 | -2.3 | -4.9 | --- |
| 3_151 | gi_119902502 | XM_601785    | MYO1E      | Myosin IE                                                                     | 0.01 | 2.1 | -2.2 | -4.7 | --- |
| 3_152 | gi_119911605 | XM_610844    | NEK8       | Nima (never in mitosis gene a)- related kinase 8                              | 0.01 | 2.1 | -2.1 | -4.5 | --- |
| 3_153 | gi_78369187  | NM_001035478 | SSBP2      | Single-stranded dna binding protein 2                                         | 0.01 | 2.1 | -2.2 | -4.5 | --- |
| 3_154 | gi_119915568 | XM_607721    | LOC529277  | Similar to homeostatic thymus hormone alpha                                   | 0.03 | 2.1 | -2.1 | -4.4 | ↑   |

## Supplementary data table 4 Full list of genes in profile 4 (n = 55)

| Profile_ S. No | SEQ. ID      | Acc. No. (RefSeq) | Putative Gene symbol | Gene Name                                                                       | BL20 LPS Vs BL20 FDR (4h/or18) | BL20 LPS Vs BL20 Abs: FC (4h/or18) | TBL20 Vs BL20 Abs: FC | TBL20 Vs BL20 LPS Abs: FC (4h/or18) | BW720c Response |
|----------------|--------------|-------------------|----------------------|---------------------------------------------------------------------------------|--------------------------------|------------------------------------|-----------------------|-------------------------------------|-----------------|
| 4_1            | gi_119919150 | XM_587468         | AHNAK                | AHNAK nucleoprotein                                                             | 0.01                           | -2.1                               | 112.4                 | 235.4                               | ---             |
| 4_2            | gi_119907136 | XM_592427         | OAF                  | Oaf homolog (drosophila)                                                        | 0.00                           | -23.4                              | 5.7                   | 134.1                               | ↓               |
| 4_3            | gi_119895006 | XM_590414         | LOC512831            | Similar to heterogeneous nuclear ribonucleoproteins a2/b1 (HNRNP a2 / HNRNP b1) | 0.00                           | -2.4                               | 44.5                  | 106.1                               | ↓               |
| 4_4            | gi_122692346 | NM_001080368      | THEM4                | Thioesterase superfamily member 4                                               | 0.00                           | -19.4                              | 5.4                   | 104.2                               | ---             |
| 4_5            | gi_119912853 | XM_604523         | LOC526163            | Similar to cmf-35 antigen                                                       | 0.01                           | -2.1                               | 47.4                  | 99.0                                | ---             |
| 4_6            | gi_119902404 | XM_869291         | TMEM62               | Transmembrane protein 62                                                        | 0.00                           | -3.3                               | 22.8                  | 75.4                                | ---             |
| 4_7            | gi_148233315 | NM_001098165      | RNASEL               | Ribonuclease I (2',5'-oligoadenylate synthetase-dependent)                      | 0.00                           | -3.3                               | 18.6                  | 60.6                                | ---             |
| 4_8            | gi_31341924  | NM_174464         | SPARC                | Secreted protein, acidic, cysteine-rich (osteonectin)                           | 0.00                           | -14.0                              | 3.8                   | 53.4                                | ---             |
| 4_9            | gi_164451483 | NM_001024533      | SLA                  | Src-like-adaptor                                                                | 0.00                           | -2.5                               | 18.4                  | 45.5                                | ---             |
| 4_10           | gi_78042479  | NM_001035009      | NDRG1                | N-myc downstream regulated 1                                                    | 0.00                           | -7.9                               | 5.5                   | 43.4                                | ---             |
| 4_11           | gi_119894531 | XM_602953         | PDE4C                | Phosphodiesterase 4c, camp-specific                                             | 0.00                           | -2.4                               | 17.1                  | 41.5                                | ↑               |

|      |              |              |           |                                                                                                 |      |       |      |      |     |
|------|--------------|--------------|-----------|-------------------------------------------------------------------------------------------------|------|-------|------|------|-----|
| 4_12 | gi_115497115 | NM_001076483 | ANGPT4    | Angiopoietin 4                                                                                  | 0.00 | -7.5  | 4.9  | 36.5 | ↓   |
| 4_13 | gi_119937227 | XM_001256143 | LOC789368 | Similar to solute carrier family 38, member 5                                                   | 0.00 | -9.8  | 3.7  | 36.4 | --- |
| 4_14 | gi_62751481  | NM_001015534 | GALNT6    | Udp-n-acetyl-alpha-d-galactosamine:polypeptide n-acetylgalactosaminyltransferase 6              | 0.00 | -2.6  | 12.4 | 32.8 | --- |
| 4_15 | gi_115495710 | NM_001075904 | LRRC6     | Leucine rich repeat containing 6                                                                | 0.00 | -6.0  | 5.3  | 31.9 | --- |
| 4_16 | gi_119879461 | XM_001253104 | GCET2     | Germinal center expressed transcript 2                                                          | 0.00 | -8.1  | 3.7  | 30.1 | ↑   |
| 4_17 | gi_119915783 | XM_617171    | CMAH      | Cytidine monophosphate-n-acetylneuraminic acid hydroxylase (cmp-n-acetylneuraminase pseudogene) | 0.00 | -11.0 | 2.5  | 27.7 | --- |
| 4_18 | gi_157279936 | NM_001105014 | TRIM44    | Tripartite motif containing 44                                                                  | 0.00 | -4.1  | 6.1  | 25.1 | ↑   |
| 4_19 | gi_154707907 | NM_001099095 | GZMA      | Granzyme a (granzyme 1, cytotoxic t-lymphocyte-associated serine esterase 3)                    | 0.00 | -4.1  | 6.1  | 24.8 | --- |
| 4_20 | gi_116004014 | NM_001076898 | PAK1      | P21 protein (cdc42/rac)-activated kinase 1                                                      | 0.00 | -3.7  | 6.1  | 22.3 | ↑   |
| 4_21 | gi_119888157 | XM_580320    | STEAP3    | STEAP family member 3                                                                           | 0.01 | -2.0  | 10.9 | 21.9 | --- |
| 4_22 | gi_119889474 | XR_028680    | LOC788729 | Similar to B-cell clI/Lymphoma 9                                                                | 0.00 | -3.2  | 6.6  | 21.1 | --- |
| 4_23 | gi_119913792 | XM_866155    | PSTPIP1   | Proline-serine-threonine phosphatase interacting protein 1                                      | 0.00 | -6.4  | 3.2  | 20.7 | --- |
| 4_24 | gi_61316456  | NM_001013003 | NEIL2     | Nei endonuclease viii-like 2 (e. Coli)                                                          | 0.00 | -2.8  | 7.1  | 20.1 | --- |
| 4_25 | gi_119913787 | XM_616041    | TBC1D2B   | Tbc1 domain family, member 2b                                                                   | 0.00 | -2.7  | 7.4  | 19.6 | --- |
| 4_26 | gi_119901593 | XM_593801    | FUCA2     | Fucosidase, alpha-l-2, plasma                                                                   | 0.00 | -2.9  | 6.4  | 18.5 | ↑   |
| 4_27 | gi_117935052 | NM_001024930 | CCR7      | Chemokine (c-c motif) receptor 7                                                                | 0.00 | -8.9  | 2.0  | 17.9 | --- |
| 4_28 | gi_31341731  | NM_174536    | ENTPD1    | Ectonucleoside triphosphate diphosphohydrolase 1                                                | 0.00 | -2.3  | 7.6  | 17.1 | --- |
| 4_29 | gi_119879477 | XM_585702    | ZBTB20    | Similar to btb/poz zinc finger protein DPZF                                                     | 0.00 | -2.3  | 6.7  | 15.1 | --- |
| 4_30 | gi_119896213 | XM_600235    | MLLT3     | Myeloid/lymphoid or mixed-lineage leukemia (trithorax homolog, drosophila); translocated to, 3  | 0.00 | -3.3  | 4.2  | 13.9 | --- |
| 4_31 | gi_77736587  | NM_001034795 | GALM      | Galactose mutarotase (aldose 1-epimerase)                                                       | 0.00 | -6.9  | 2.0  | 13.9 | --- |
| 4_32 | gi_119911895 | XM_866482    | PIK3R5    | Phosphoinositide-3-kinase, regulatory subunit 5                                                 | 0.00 | -2.3  | 6.0  | 13.5 | --- |
| 4_33 | gi_95147677  | NM_001033119 | FOXA3     | Forkhead box a3                                                                                 | 0.00 | -2.5  | 4.3  | 10.8 | --- |
| 4_34 | gi_119930210 | XM_001249776 | LOC781367 | Similar to ep2 receptor                                                                         | 0.01 | -2.1  | 5.0  | 10.7 | --- |
| 4_35 | gi_119918268 | XM_877825    | AP3M2     | Adaptor-related protein complex 3, mu 2 subunit                                                 | 0.00 | -2.5  | 4.1  | 10.4 | --- |
| 4_36 | gi_77736204  | NM_001034629 | EPHX1     | Epoxide hydrolase 1, microsomal (xenobiotic)                                                    | 0.00 | -2.3  | 4.4  | 10.3 | ↑   |
| 4_37 | gi_119906384 | XM_601798    | MTSS1     | Metastasis suppressor 1                                                                         | 0.00 | -2.5  | 3.8  | 9.3  | ↑   |
| 4_38 | gi_119928343 | XM_001255819 | LOC788911 | Similar to ectonucleotide pyrophosphatase/phosphodiesterase 2 (autotaxin)                       | 0.00 | -3.2  | 2.8  | 9.1  | ↓   |
| 4_39 | gi_119918529 | XM_585583    | PRF1      | Perforin 1 (pore forming protein)                                                               | 0.01 | -2.0  | 4.4  | 8.9  | --- |
| 4_40 | gi_115496985 | NM_001076382 | MGST2     | Microsomal glutathione s-transferase 2                                                          | 0.00 | -3.1  | 2.7  | 8.2  | --- |
| 4_41 | gi_119879750 | XM_596716    | DGKG      | Diacylglycerol kinase, gamma 90kda                                                              | 0.00 | -3.4  | 2.4  | 8.1  | --- |
| 4_42 | gi_156120702 | NM_001102028 | PIK3R6    | Phosphoinositide-3-kinase, regulatory subunit 6                                                 | 0.01 | -2.0  | 3.8  | 7.8  | ↓   |
| 4_43 | gi_134085680 | NM_001083454 | ABI3      | ABI family, member 3                                                                            | 0.00 | -3.0  | 2.5  | 7.6  | --- |
| 4_44 | gi_156121270 | NM_001102313 | HRC       | Histidine rich calcium binding protein                                                          | 0.01 | -2.2  | 3.3  | 7.1  | --- |
| 4_45 | gi_154152162 | NM_001100375 | BBS12     | Bardet-biedl syndrome 12                                                                        | 0.01 | -2.1  | 3.3  | 7.0  | --- |
| 4_46 | gi_158937245 | NM_001110194 | HCK       | Hemopoietic cell kinase                                                                         | 0.00 | -2.7  | 2.3  | 6.3  | --- |
| 4_47 | gi_119907280 | XM_001252306 | SUMO3     | SMT3 suppressor of mif two 3 homolog 3 (s. Cerevisiae)                                          | 0.00 | -2.6  | 2.3  | 6.0  | --- |
| 4_48 | gi_94966784  | NM_001040490 | TNFRSF1B  | Tumor necrosis factor receptor superfamily, member 1b                                           | 0.01 | -2.1  | 2.8  | 5.9  | --- |
| 4_49 | gi_155372272 | NM_001101279 | LOC781494 | Similar to myeloid-associated differentiation marker                                            | 0.01 | -2.1  | 2.7  | 5.7  | ↑   |
| 4_50 | gi_119893596 | XM_584935    | SLC39A8   | Solute carrier family 39 (zinc transporter), member 8                                           | 0.01 | -2.1  | 2.6  | 5.5  | --- |
| 4_51 | gi_119915318 | XR_028520    | LOC512304 | Similar to enpp5                                                                                | 0.00 | -2.5  | 2.2  | 5.5  | --- |
| 4_52 | gi_125991861 | NM_001081619 | MGC151839 | Similar to calpain                                                                              | 0.01 | -2.0  | 2.7  | 5.4  | --- |
| 4_53 | gi_116003874 | NM_001076826 | ANTXR2    | Anthrax toxin receptor 2                                                                        | 0.01 | -2.1  | 2.6  | 5.4  | --- |
| 4_54 | gi_119914706 | XM_609627    | SEMA3F    | SEMA domain, immunoglobulin domain (ig), short basic domain, secreted, (semaphorin) 3f          | 0.00 | -2.5  | 2.0  | 5.1  | --- |
| 4_55 | gi_119908660 | XM_611689    | LAMC1     | Laminin, gamma 1 (formerly lamb2)                                                               | 0.01 | -2.0  | 2.1  | 4.2  | --- |

## Supplementary data table 5 Full list of genes in profile 5 (n = 38)

| Profile_ S. No | SEQ. ID      | Acc. No. (RefSeq) | Putative Gene symbol | Gene Name                                                                       | BL20 LPS Vs BL20 FDR (4h/or18) | BL20 LPS Vs BL20 Abs: FC (4h/or18) | TBL20 Vs BL20 Abs: FC | TBL20 Vs BL20 LPS Abs: FC (4h/or18) | BW720c Response |
|----------------|--------------|-------------------|----------------------|---------------------------------------------------------------------------------|--------------------------------|------------------------------------|-----------------------|-------------------------------------|-----------------|
| 5_1            | gi_66792905  | NM_001024557      | OAS2                 | 2'-5'-oligoadenylate synthetase 2, 69/71kda                                     | 0.00                           | ↑↑ 125.9                           | ↑ 3.9                 | -32.1                               | ↑               |
| 5_2            | gi_114051539 | NM_001046590      | CD83                 | CD83 molecule                                                                   | 0.00                           | 57.1                               | 2.1                   | -27.5                               | ---             |
| 5_3            | gi_114052748 | NM_001046551      | CXCL10               | Chemokine (c-x-c motif) ligand 10                                               | 0.00                           | 272.5                              | 11.2                  | -24.3                               | ↓               |
| 5_4            | gi_119910676 | XM_600955         | RELB                 | V-rel reticuloendotheliosis viral oncogene homolog b                            | 0.00                           | 27.2                               | 2.5                   | -10.7                               | ---             |
| 5_5            | gi_119901537 | XM_584832         | TNFAIP3              | Tumor necrosis factor, alpha-induced protein 3                                  | 0.00                           | 57.1                               | 6.6                   | -8.6                                | ---             |
| 5_6            | gi_119889854 | XM_001253071      | TGFB3                | Transforming growth factor, beta receptor iii                                   | 0.00                           | 37.0                               | 4.5                   | -8.3                                | ↑               |
| 5_7            | gi_156523227 | NM_001102558      | CX3CR1               | Chemokine (C-x3-C motif) receptor 1                                             | 0.00                           | 48.5                               | 5.9                   | -8.2                                | ↑               |
| 5_8            | gi_125991933 | NM_001081621      | TIFA                 | Traf-interacting protein with forkhead-associated domain                        | 0.00                           | 34.8                               | 5.0                   | -7.0                                | ---             |
| 5_9            | gi_31343037  | NM_174014         | CD69                 | CD69 molecule                                                                   | 0.00                           | 37.7                               | 5.7                   | -6.6                                | ↓               |
| 5_10           | gi_119905687 | XM_585095         | ZBP1                 | Similar to putative tumor stroma and activated macrophage protein dlm-1         | 0.00                           | 46.3                               | 7.4                   | -6.3                                | ↑               |
| 5_11           | gi_119896106 | XM_580928         | DDX58                | Dead (asp-glu-ala-asp) box polypeptide 58                                       | 0.00                           | 13.9                               | 2.2                   | -6.2                                | ---             |
| 5_12           | gi_62988293  | NM_001017940      | USP18                | Ubiquitin specific peptidase 18                                                 | 0.00                           | 21.5                               | 3.7                   | -5.7                                | ---             |
| 5_13           | gi_115496813 | NM_001075310      | BCL2L11              | BCL2-like 11 (apoptosis facilitator)                                            | 0.00                           | 14.7                               | 2.8                   | -5.2                                | ↓               |
| 5_14           | gi_31343249  | NM_173924         | IL7                  | Interleukin 7                                                                   | 0.00                           | 10.3                               | 2.1                   | -5.0                                | ↓               |
| 5_15           | gi_27805954  | NM_174366         | ISG15                | ISG15 ubiquitin-like modifier                                                   | 0.00                           | 120.9                              | 25.8                  | -4.7                                | ---             |
| 5_16           | gi_71067099  | NM_001029846      | OAS1                 | 2',5'-oligoadenylate synthetase 1, 40/46kda                                     | 0.00                           | 13.1                               | 2.9                   | -4.5                                | ↑               |
| 5_17           | gi_94967003  | NM_001040606      | OAS1                 | 2',5'-oligoadenylate synthetase 1, 40/46kda                                     | 0.00                           | 34.5                               | 8.1                   | -4.3                                | ↑               |
| 5_18           | gi_62751388  | NM_001015545      | LGP2                 | Rna helicase lgp2                                                               | 0.00                           | 20.0                               | 4.8                   | -4.2                                | ↑               |
| 5_19           | gi_156120848 | NM_001102101      | NFKB2                | Nuclear factor of kappa light polypeptide gene enhancer in b-cells 2 (p49/p100) | 0.00                           | 28.3                               | 7.1                   | -4.0                                | ---             |
| 5_20           | gi_115494987 | NM_001075771      | PARM1                | Prostate androgen-regulated mucin-like protein 1                                | 0.00                           | 8.5                                | 2.3                   | -3.7                                | ---             |
| 5_21           | gi_119894560 | XM_584000         | BST2                 | Bone marrow stromal cell antigen 2                                              | 0.00                           | 17.6                               | 4.8                   | -3.7                                | ---             |
| 5_22           | gi_119917771 | XM_583612         | LOC507061            | Similar to dual specificity phosphatase 5                                       | 0.00                           | 11.9                               | 3.3                   | -3.6                                | ---             |

|      |              |              |           |                                                                                    |      |       |      |      |     |
|------|--------------|--------------|-----------|------------------------------------------------------------------------------------|------|-------|------|------|-----|
| 5_23 | gi_158341671 | NM_001109981 | ITGA6     | Integrin, alpha 6                                                                  | 0.00 | 43.2  | 11.9 | -3.6 | --- |
| 5_24 | gi_41386700  | NM_174726    | NFKBIZ    | Nuclear factor of kappa light polypeptide gene enhancer in b-cells inhibitor, zeta | 0.00 | 14.3  | 4.0  | -3.6 | --- |
| 5_25 | gi_119913076 | XM_587229    | PLK2      | Polo-like kinase 2                                                                 | 0.00 | 7.4   | 2.2  | -3.4 | --- |
| 5_26 | gi_118150773 | NM_001077827 | JUN       | Jun proto-oncogene                                                                 | 0.00 | 7.0   | 2.2  | -3.1 | --- |
| 5_27 | gi_31342215  | NM_174364    | INPP1     | Inositol polyphosphate-1-phosphatase                                               | 0.00 | 6.0   | 2.0  | -3.0 | --- |
| 5_28 | gi_119908035 | XM_589248    | LOC511831 | Similar to renin                                                                   | 0.00 | 9.4   | 3.3  | -2.8 | ↑   |
| 5_29 | gi_78365288  | NM_001035465 | IRF5      | Interferon regulatory factor 5                                                     | 0.00 | 5.9   | 2.1  | -2.8 | ↑   |
| 5_30 | gi_119901919 | XM_593090    | SMAD3     | Smad family member 3                                                               | 0.00 | 10.7  | 4.0  | -2.7 | --- |
| 5_31 | gi_157074115 | NM_001103300 | MAFF      | V-maf musculoaponeurotic fibrosarcoma oncogene homolog f (avian)                   | 0.00 | 6.7   | 2.6  | -2.6 | ↓   |
| 5_32 | gi_119879663 | XR_027887    | LOC525407 | Hypothetical protein                                                               | 0.00 | 10.9  | 4.3  | -2.6 | ↑   |
| 5_33 | gi_31343213  | NM_173941    | MX2       | Myxovirus (influenza virus) resistance 2 (mouse)                                   | 0.00 | 100.5 | 39.9 | -2.5 | ↑   |
| 5_34 | gi_119889992 | XM_872122    | IFI44     | Interferon-induced protein 44                                                      | 0.00 | 7.4   | 3.1  | -2.4 | ↑   |
| 5_35 | gi_118601803 | NM_001079603 | CBLN3     | Cerebellin 3 precursor                                                             | 0.00 | 9.3   | 3.9  | -2.4 | ↑   |
| 5_36 | gi_147902261 | NM_001098095 | EXT1      | Exostosin 1                                                                        | 0.00 | 4.5   | 2.1  | -2.2 | --- |
| 5_37 | gi_62988287  | NM_001017937 | BAIAP2    | Bai1-associated protein 2                                                          | 0.00 | 16.4  | 7.6  | -2.2 | --- |
| 5_38 | gi_78045237  | NM_001034502 | ACTA2     | Actin, alpha 2, smooth muscle, aorta                                               | 0.00 | 11.8  | 5.7  | -2.1 | --- |

### Supplementary data table 6 Full list of genes in profile 6 (n = 13)

| Profile_ S. No | SEQ. ID      | Acc. No. (RefSeq) | Putative Gene symbol | Gene Name                                                                                                | BL20 LPS Vs BL20 FDR (4h/or18) | BL20 LPS Vs BL20 Abs: FC (4h/or18) | TBL20 Vs BL20 Abs: FC | TBL20 Vs BL20 LPS Abs: FC (4h/or18) | BW720c Response |
|----------------|--------------|-------------------|----------------------|----------------------------------------------------------------------------------------------------------|--------------------------------|------------------------------------|-----------------------|-------------------------------------|-----------------|
| 6_1            | gi_119886982 | XM_001249766      | RYK                  | RYK receptor-like tyrosine kinase                                                                        | 0.00                           | -25.8                              | ↓                     | 4.2                                 | ---             |
| 6_2            | gi_150247091 | NM_001099367      | CYP3A4               | Cytochrome p450, family 3, subfamily a, polypeptide 4                                                    | 0.00                           | -19.4                              | ↓                     | 3.5                                 | ---             |
| 6_3            | gi_115496823 | NM_001076038      | STXBP6               | Syntaxin binding protein 6 (amisyn)                                                                      | 0.00                           | -13.0                              | ↓                     | 3.5                                 | ↑               |
| 6_4            | gi_114052009 | NM_001046391      | CYP4F3               | Cytochrome p450, family 4, subfamily f, polypeptide 3                                                    | 0.00                           | -12.4                              | ↓                     | 3.4                                 | ---             |
| 6_5            | gi_157074155 | NM_001103321      | GALNT4               | Udp-n-acetyl-alpha-d-galactosamine:polypeptide n-acetylgalactosaminyltransferase 4 (Galnac-t4)           | 0.00                           | -11.5                              | ↓                     | 3.3                                 | ↑               |
| 6_6            | gi_119911826 | XR_028621         | LOC528166            | Similar to Nac-beta splice                                                                               | 0.00                           | -11.3                              | ↓                     | 3.2                                 | ↑               |
| 6_7            | gi_31415866  | NM_174573         | PGLYRP1              | Peptidoglycan recognition protein 1                                                                      | 0.00                           | -10.5                              | ↓                     | 3.1                                 | ---             |
| 6_8            | gi_119929917 | XM_001256345      | LOC789663            | Similar to KIAA0882 protein                                                                              | 0.00                           | -6.8                               | ↓                     | 2.4                                 | ---             |
| 6_9            | gi_119904624 | XM_001249768      | FLT1                 | FMS-related tyrosine kinase 1 (vascular endothelial growth factor/vascular permeability factor receptor) | 0.00                           | -5.7                               | ↓                     | 2.3                                 | ---             |
| 6_10           | gi_119331227 | NM_001079794      | AQP3                 | Aquaporin 3 (gill blood group)                                                                           | 0.00                           | -5.6                               | ↓                     | 2.3                                 | ↑               |
| 6_11           | gi_31343510  | NM_177495         | DNTT                 | Deoxynucleotidyltransferase, terminal                                                                    | 0.00                           | -5.4                               | ↓                     | 2.2                                 | ↓               |
| 6_12           | gi_115496979 | NM_001076384      | TSPAN7               | Tetraspanin 7                                                                                            | 0.00                           | -5.1                               | ↓                     | 2.1                                 | ---             |
| 6_13           | gi_119889935 | XM_866638         | LOC614782            | Riken cDNA 4930503b20 gene                                                                               | 0.00                           | -5.0                               | ↓                     | 2.1                                 | ---             |

### Supplementary data table 7 Full list of genes in profile 7 (n = 650)

| Profile_ S. No | SEQ. ID      | Acc. No. (RefSeq) | Putative Gene symbol | Gene Name                                                   | BL20 LPS Vs BL20 FDR (4h/or18) | BL20 LPS Vs BL20 Abs: FC (4h/or18) | TBL20 Vs BL20 Abs: FC | TBL20 Vs BL20 LPS Abs: FC (4h/or18) | BW720c Response |
|----------------|--------------|-------------------|----------------------|-------------------------------------------------------------|--------------------------------|------------------------------------|-----------------------|-------------------------------------|-----------------|
| 7_1            | gi_41386706  | NM_174484         | VCAM1                | Vascular cell adhesion molecule 1                           | 0.00                           | 183.1                              | ↑                     | -184.6                              | ---             |
| 7_2            | gi_139947562 | NM_001083739      | TFEC                 | Transcription factor ec                                     | 0.00                           | 34.2                               | ---                   | -47.1                               | ---             |
| 7_3            | gi_119913384 | XM_596594         | ANKRD33B             | Ankyrin repeat domain 33b                                   | 0.00                           | 30.5                               | ---                   | -45.1                               | ---             |
| 7_4            | gi_119924697 | XM_589150         | LOC511753            | Similar to seven transmembrane helix receptor               | 0.00                           | 35.2                               | ---                   | -39.7                               | ---             |
| 7_5            | gi_119922152 | XM_001252866      | LOC784595            | Similar to olfactory receptor olfr1174                      | 0.00                           | 16.1                               | ---                   | -26.8                               | ---             |
| 7_6            | gi_119930245 | XM_868109         | ADAMTSL5             | Adams-like 5                                                | 0.00                           | 15.6                               | ---                   | -26.6                               | ---             |
| 7_7            | gi_119911031 | XM_581045         | AU018091             | Expressed sequence AU018091                                 | 0.00                           | 13.5                               | ---                   | -24.2                               | ---             |
| 7_8            | gi_157427901 | NM_001105388      | ITK                  | IL2-inducible t-cell kinase                                 | 0.00                           | 16.2                               | ---                   | -22.6                               | ---             |
| 7_9            | gi_119925538 | XM_586833         | LOC509794            | Similar to tesc protein, transcript variant 1               | 0.00                           | 16.5                               | ---                   | -22.5                               | ---             |
| 7_10           | gi_119892989 | XM_591681         | STYK1                | Serine/threonine/tyrosine kinase 1                          | 0.00                           | 23.1                               | ---                   | -21.4                               | ---             |
| 7_11           | gi_155372040 | NM_001101158      | VCAM1                | Vascular cell adhesion molecule 1                           | 0.00                           | 14.4                               | ---                   | -20.9                               | ---             |
| 7_12           | gi_119892383 | XM_587244         | SRGAP1               | Slit-robo rho gtpase activating protein 1                   | 0.00                           | 27.7                               | ---                   | -20.9                               | ---             |
| 7_13           | gi_119879695 | XM_867115         | TP63                 | Tumor protein p63                                           | 0.00                           | 36.2                               | ---                   | -19.1                               | ---             |
| 7_14           | gi_115496711 | NM_001075696      | IRAK2                | Interleukin-1 receptor-associated kinase 2                  | 0.00                           | 9.4                                | ---                   | -18.5                               | ---             |
| 7_15           | gi_84579864  | NM_001038682      | AICDA                | Activation-induced cytidine deaminase                       | 0.00                           | 16.0                               | ---                   | -18.3                               | ---             |
| 7_16           | gi_119914336 | XM_871109         | CCR8                 | Chemokine (c-c motif) receptor 8                            | 0.00                           | 18.2                               | ---                   | -17.7                               | ---             |
| 7_17           | gi_119934789 | XM_001256599      | LOC790001            | Similar to transmembrane protein 17                         | 0.00                           | 11.0                               | ---                   | -17.3                               | ---             |
| 7_18           | gi_115496259 | NM_001075147      | CCL4                 | Chemokine (c-c motif) ligand 4                              | 0.00                           | 13.4                               | ---                   | -17.3                               | ---             |
| 7_19           | gi_114052247 | NM_001045923      | PLS3                 | Plastin 3                                                   | 0.00                           | 23.5                               | ---                   | -16.5                               | ---             |
| 7_20           | gi_84000076  | NM_001038050      | IFI27                | Interferon, alpha-inducible protein 27                      | 0.00                           | 14.2                               | ---                   | -16.5                               | ---             |
| 7_21           | gi_119927221 | XM_586292         | FAM111B              | Family with sequence similarity 111, member b               | 0.00                           | 9.8                                | ---                   | -15.4                               | ---             |
| 7_22           | gi_115495364 | NM_001075414      | IFIT3                | Interferon-induced protein with tetratricopeptide repeats 3 | 0.00                           | 10.4                               | ---                   | -14.7                               | ---             |
| 7_23           | gi_149944702 | NM_001099086      | BLOC1S3              | Biogenesis of lysosomal organelles complex-1, subunit 3     | 0.00                           | 8.2                                | ---                   | -14.3                               | ---             |
| 7_24           | gi_149642684 | NM_001098935      | OSTN                 | Osteocrin                                                   | 0.00                           | 10.5                               | ---                   | -14.2                               | ---             |
| 7_25           | gi_119906018 | XM_581509         | CD40                 | CD40 molecule, tnfr receptor superfamily member 5           | 0.00                           | 10.7                               | ---                   | -13.8                               | ---             |
| 7_26           | gi_115497163 | NM_001075120      | LPL                  | Lipoprotein lipase                                          | 0.00                           | 7.2                                | ---                   | -13.8                               | ---             |
| 7_27           | gi_31343065  | NM_174002         | CASR                 | Calcium-sensing receptor                                    | 0.00                           | 7.8                                | ---                   | -13.2                               | ---             |

|       |              |              |           |                                                                                              |      |      |      |       |     |
|-------|--------------|--------------|-----------|----------------------------------------------------------------------------------------------|------|------|------|-------|-----|
| 7_28  | gi_114052816 | NM_001045868 | NFKBIA    | Nuclear factor of kappa light polypeptide gene enhancer in b-cells inhibitor, alpha          | 0.00 | 6.6  | -2.0 | -13.0 | --- |
| 7_29  | gi_118150869 | NM_001077879 | MOBP      | Myelin-associated oligodendrocyte basic protein                                              | 0.00 | 8.4  | -1.5 | -12.5 | --- |
| 7_30  | gi_119908270 | XR_027843    | LOC515996 | Similar to kynurenine 3-monooxygenase                                                        | 0.00 | 9.8  | -1.3 | -12.3 | --- |
| 7_31  | gi_119918849 | XM_586751    | ODZ4      | Odz, odd oz/ten-m homolog 4 (drosophila)                                                     | 0.00 | 6.9  | -1.8 | -12.1 | --- |
| 7_32  | gi_116004430 | NM_001077106 | MGC140080 | Hypothetical protein                                                                         | 0.00 | 8.0  | -1.5 | -12.0 | --- |
| 7_33  | gi_119890779 | XM_864659    | AGMO      | Alkylglycerol monooxygenase                                                                  | 0.00 | 5.9  | -1.9 | -11.2 | --- |
| 7_34  | gi_119907990 | XM_606934    | LOC528508 | Similar to DTX4 protein                                                                      | 0.00 | 9.2  | -1.2 | -11.0 | --- |
| 7_35  | gi_78045490  | NM_001035045 | FSCN1     | Fascin homolog 1, actin-bundling protein (strongylocentrotus purpuratus)                     | 0.00 | 5.5  | -2.0 | -10.9 | --- |
| 7_36  | gi_84000092  | NM_001038063 | TMCC3     | Transmembrane and coiled-coil domain family 3                                                | 0.00 | 16.0 | 1.5  | -10.8 | --- |
| 7_37  | gi_119895319 | XM_001254960 | LOC787618 | Similar to olfactory receptor mor104-2                                                       | 0.00 | 8.0  | -1.4 | -10.8 | --- |
| 7_38  | gi_119926791 | XM_001250097 | LOC781642 | Similar to olfactory receptor mor8-2                                                         | 0.00 | 8.7  | -1.2 | -10.6 | --- |
| 7_39  | gi_156120634 | NM_001101994 | SLC6A12   | Solute carrier family 6, member 12                                                           | 0.00 | 9.2  | -1.1 | -10.4 | --- |
| 7_40  | gi_119924440 | XM_868840    | TAAR6     | Trace amine associated receptor 6                                                            | 0.00 | 7.3  | -1.4 | -10.1 | --- |
| 7_41  | gi_119910036 | XR_027515    | LOC539231 | Hypothetical protein                                                                         | 0.00 | 11.1 | 1.1  | -9.9  | --- |
| 7_42  | gi_119903170 | XM_864858    | TBC1D8    | Tbc1 domain family, member 8 (with gram domain)                                              | 0.00 | 6.2  | -1.6 | -9.9  | --- |
| 7_43  | gi_31340697  | NM_178572    | CA2       | Carbonic anhydrase ii                                                                        | 0.00 | 6.6  | -1.5 | -9.8  | --- |
| 7_44  | gi_31342632  | NM_174187    | SPP1      | Secreted phosphoprotein 1                                                                    | 0.00 | 12.0 | 1.2  | -9.7  | --- |
| 7_45  | gi_139948963 | NM_001083752 | C3AR1     | Complement component 3a receptor 1                                                           | 0.00 | 19.4 | 2.0  | -9.7  | --- |
| 7_46  | gi_156120912 | NM_001102133 | FRMD6     | Ferm domain containing 6                                                                     | 0.00 | 5.3  | -1.8 | -9.6  | --- |
| 7_47  | gi_59676571  | NM_001012284 | UBA7      | Ubiquitin-like modifier activating enzyme 7                                                  | 0.00 | 6.3  | -1.5 | -9.4  | --- |
| 7_48  | gi_119926098 | XM_001254787 | LOC787369 | Similar to olfactory receptor Olfr1174                                                       | 0.00 | 7.4  | -1.2 | -8.9  | --- |
| 7_49  | gi_115496899 | NM_001075588 | IFI6      | Interferon, alpha-inducible protein 6                                                        | 0.00 | 10.5 | 1.2  | -8.7  | --- |
| 7_50  | gi_61827360  | XM_586955    | ORSM9     | Olfactory receptor, family 5, subfamily m, member 9                                          | 0.00 | 8.1  | -1.1 | -8.7  | --- |
| 7_51  | gi_61826046  | XM_610803    | Olfr1390  | Olfactory receptor 1390                                                                      | 0.00 | 6.4  | -1.4 | -8.6  | --- |
| 7_52  | gi_30794323  | NM_181017    | TAC3      | Tachykinin 3                                                                                 | 0.00 | 4.8  | -1.8 | -8.6  | --- |
| 7_53  | gi_59676558  | NM_001012281 | CFLAR     | Casp8 and fadd-like apoptosis regulator                                                      | 0.00 | 5.5  | -1.6 | -8.6  | --- |
| 7_54  | gi_119922313 | XM_601384    | Olfr53    | Olfactory receptor 53                                                                        | 0.00 | 7.2  | -1.2 | -8.5  | --- |
| 7_55  | gi_76681522  | XM_593553    | ORS5D18   | Olfactory receptor, family 5, subfamily d, member 18                                         | 0.00 | 6.3  | -1.4 | -8.5  | --- |
| 7_56  | gi_119892557 | XM_001255374 | Olfr1012  | Olfactory receptor 1012                                                                      | 0.00 | 8.5  | 1.0  | -8.3  | --- |
| 7_57  | gi_157427871 | NM_001105373 | TMEM140   | Transmembrane protein 140                                                                    | 0.00 | 5.3  | -1.6 | -8.3  | --- |
| 7_58  | gi_119895328 | XM_001255032 | LOC787758 | Similar to olfactory receptor mor277-1                                                       | 0.00 | 7.8  | -1.0 | -8.2  | --- |
| 7_59  | gi_119927666 | XM_587987    | LOC510786 | Similar to olfactory receptor olfr1034                                                       | 0.00 | 6.9  | -1.2 | -8.1  | --- |
| 7_60  | gi_155372274 | NM_001101280 | TRAF4     | Tnf receptor-associated factor 4                                                             | 0.00 | 4.3  | -1.9 | -8.1  | --- |
| 7_61  | gi_119914298 | XR_028825    | LOC509859 | Similar to KIAA0342 protein                                                                  | 0.00 | 4.8  | -1.7 | -8.0  | --- |
| 7_62  | gi_76718610  | NM_871454    | LOC619135 | Hypothetical                                                                                 | 0.00 | 6.8  | -1.2 | -8.0  | --- |
| 7_63  | gi_31341586  | NM_174593    | RASSF2    | Ras association (ralgds/af-6) domain family member 2                                         | 0.00 | 4.7  | -1.7 | -7.9  | --- |
| 7_64  | gi_119892545 | XM_001255291 | OR6C3     | Olfactory receptor, family 6, subfamily c, member 3                                          | 0.00 | 6.3  | -1.2 | -7.8  | --- |
| 7_65  | gi_119931104 | XM_001256850 | LOC790355 | Similar to olfactory receptor mor17-2                                                        | 0.00 | 6.8  | -1.1 | -7.6  | --- |
| 7_66  | gi_119901479 | XM_001250862 | LOC783380 | Similar to trace amine receptor 8                                                            | 0.00 | 6.9  | -1.1 | -7.5  | --- |
| 7_67  | gi_119924695 | XM_605606    | Olfr827   | Olfactory receptor 827                                                                       | 0.00 | 5.7  | -1.3 | -7.5  | --- |
| 7_68  | gi_119879545 | XM_592997    | DTX3L     | Deltex 3-like (drosophila)                                                                   | 0.00 | 4.4  | -1.7 | -7.5  | --- |
| 7_69  | gi_76688849  | XM_589845    | LOC512340 | Similar to olfactory receptor mor210-5                                                       | 0.00 | 4.7  | -1.5 | -7.3  | --- |
| 7_70  | gi_166157489 | NM_001113764 | TYK2      | Tyrosine kinase 2                                                                            | 0.00 | 3.8  | -1.9 | -7.3  | --- |
| 7_71  | gi_119921250 | XM_587900    | OR4A47    | Olfactory receptor, family 4, subfamily a, member 47                                         | 0.00 | 7.3  | 1.0  | -7.3  | --- |
| 7_72  | gi_119921722 | XM_001255525 | LOC788476 | Similar to olfactory receptor olfr1174                                                       | 0.00 | 6.4  | -1.1 | -7.3  | --- |
| 7_73  | gi_162951886 | NM_001112708 | SNAI1     | Snail homolog 1 (drosophila)                                                                 | 0.00 | 3.8  | -1.9 | -7.3  | --- |
| 7_74  | gi_114051256 | NM_001046193 | ATF3      | Activating transcription factor 3                                                            | 0.00 | 3.7  | -2.0 | -7.3  | --- |
| 7_75  | gi_119887633 | XM_615590    | IFIH1     | Interferon induced with helicase c domain 1                                                  | 0.00 | 11.4 | 1.6  | -7.3  | --- |
| 7_76  | gi_119910857 | XM_587935    | PLEKHA4   | Pleckstrin homology domain containing, family a (phosphoinositide binding specific) member 4 | 0.00 | 7.4  | 1.0  | -7.3  | --- |
| 7_77  | gi_31341381  | NM_176668    | AOX1      | Aldehyde oxidase 1                                                                           | 0.00 | 4.1  | -1.7 | -7.2  | --- |
| 7_78  | gi_119901000 | XM_613776    | TRAF1     | Tnf receptor-associated factor 1                                                             | 0.00 | 3.9  | -1.8 | -7.2  | --- |
| 7_79  | gi_114051859 | NM_001045963 | Chn2      | Chimerin (chimaerin) 2                                                                       | 0.00 | 5.3  | -1.4 | -7.2  | --- |
| 7_80  | gi_78369427  | NM_001035317 | MVP       | Major vault protein                                                                          | 0.00 | 3.6  | -2.0 | -7.1  | --- |
| 7_81  | gi_76633796  | XM_585978    | C20orf123 | Chromosome 20 open reading frame 123                                                         | 0.00 | 3.8  | -1.9 | -7.1  | --- |
| 7_82  | gi_119895348 | XM_001255168 | OR2L3     | Olfactory receptor, family 2, subfamily l, member 3                                          | 0.00 | 6.6  | -1.1 | -7.0  | --- |
| 7_83  | gi_119930502 | XM_001255446 | LOC788363 | Hypothetical protein                                                                         | 0.00 | 5.8  | -1.2 | -7.0  | --- |
| 7_84  | gi_76670425  | XM_588413    | TAAR6     | Trace amine associated receptor 6                                                            | 0.00 | 6.0  | -1.2 | -7.0  | --- |
| 7_85  | gi_31342492  | NM_178108    | OAS1      | 2',5'-oligoadenylate synthetase 1, 40/46kda                                                  | 0.00 | 11.2 | 1.6  | -6.9  | --- |
| 7_86  | gi_119922211 | XM_611011    | Olfr1199  | Olfactory receptor 1199                                                                      | 0.00 | 5.2  | -1.3 | -6.9  | --- |
| 7_87  | gi_119891154 | XM_863839    | ZMIZ2     | Similar to zmi2 protein, transcript variant 2                                                | 0.00 | 5.2  | -1.3 | -6.8  | --- |
| 7_88  | gi_76619274  | XM_597187    | OVCH1     | Ovochymase 1                                                                                 | 0.00 | 5.2  | -1.3 | -6.8  | --- |
| 7_89  | gi_76670295  | XM_865067    | RNF213    | Ring finger protein 213                                                                      | 0.00 | 6.8  | 1.0  | -6.8  | --- |
| 7_90  | gi_119904826 | XM_001249505 | SLITRK6   | Slit and ntrk-like family, member 6                                                          | 0.00 | 6.1  | -1.1 | -6.6  | --- |
| 7_91  | gi_119879459 | XM_865244    | C3orf52   | Chromosome 3 open reading frame 52                                                           | 0.00 | 6.6  | 1.0  | -6.6  | --- |
| 7_92  | gi_118150959 | NM_001077930 | ERRF1     | ErbB receptor feedback inhibitor 1                                                           | 0.00 | 6.3  | 1.0  | -6.6  | --- |
| 7_93  | gi_119906065 | XM_589621    | ZNFX1     | Similar to kiaa1404 protein                                                                  | 0.00 | 5.0  | -1.3 | -6.5  | --- |
| 7_94  | gi_114051699 | NM_001046522 | TMEM100   | Transmembrane protein 100                                                                    | 0.00 | 7.5  | 1.1  | -6.5  | --- |
| 7_95  | gi_87196509  | NM_001010995 | TPM2      | Tropomyosin 2 (beta)                                                                         | 0.00 | 4.1  | -1.6 | -6.5  | --- |
| 7_96  | gi_115497773 | NM_001075226 | RILPL1    | Rab interacting lysosomal protein-like 1                                                     | 0.00 | 4.1  | -1.6 | -6.4  | --- |
| 7_97  | gi_119894058 | XM_605463    | ENAM      | Enamelin                                                                                     | 0.00 | 4.5  | -1.4 | -6.4  | --- |
| 7_98  | gi_119894556 | XM_593682    | LOC515629 | Similar to b-cell novel protein isoform 1; bcnp1                                             | 0.00 | 3.9  | -1.7 | -6.4  | --- |
| 7_99  | gi_119921254 | XM_609448    | OR9G1     | Olfactory receptor, family 9, subfamily g, member 1                                          | 0.00 | 5.4  | -1.2 | -6.4  | --- |
| 7_100 | gi_119902162 | XM_001252369 | OR11G2    | Olfactory receptor, family 11, subfamily g, member 2                                         | 0.00 | 5.2  | -1.2 | -6.3  | --- |
| 7_101 | gi_118151335 | NM_001078135 | LOC768323 | Hypothetical protein                                                                         | 0.00 | 6.7  | 1.1  | -6.2  | --- |
| 7_102 | gi_119889733 | XM_001253222 | COL11A1   | Collagen, type xi, alpha 1                                                                   | 0.00 | 5.2  | -1.2 | -6.2  | --- |
| 7_103 | gi_119924512 | XM_001253583 | Olfr1303  | Olfactory receptor 1303                                                                      | 0.00 | 4.5  | -1.4 | -6.1  | ↑   |
| 7_104 | gi_31342122  | NM_174395    | MYO1A     | Myosin 1A                                                                                    | 0.00 | 3.5  | -1.8 | -6.1  | --- |
| 7_105 | gi_76683585  | XM_592773    | Olfr1159  | Olfactory receptor 1159                                                                      | 0.00 | 4.2  | -1.4 | -6.0  | --- |
| 7_106 | gi_164451473 | NM_001024530 | SIDT2     | Sid1 transmembrane family, member 2                                                          | 0.00 | 5.6  | -1.1 | -6.0  | --- |
| 7_107 | gi_70778941  | NM_001025332 | FABP2     | Fatty acid binding protein 2, intestinal                                                     | 0.00 | 3.2  | -1.9 | -5.9  | ↑   |
| 7_108 | gi_119915708 | XM_870237    | LOC617905 | Hypothetical protein                                                                         | 0.00 | 4.0  | -1.5 | -5.9  | --- |
| 7_109 | gi_119915700 | XM_592049    | OR2M2     | Olfactory receptor, family 2, subfamily m, member 2                                          | 0.00 | 4.6  | -1.3 | -5.9  | --- |
| 7_110 | gi_119923762 | XM_001253761 | ORSAN1    | Olfactory receptor, family 5, subfamily an, member 1                                         | 0.00 | 3.7  | -1.6 | -5.9  | --- |
| 7_111 | gi_119917459 | XM_580537    | SLC16A12  | Solute carrier family 16, member 12 (monocarboxylic acid transporter 12)                     | 0.00 | 4.3  | -1.4 | -5.8  | --- |
| 7_112 | gi_119923766 | XM_580276    | ORSAN1    | Olfactory receptor, family 5, subfamily an, member 1                                         | 0.00 | 3.9  | -1.5 | -5.8  | --- |

|       |              |              |           |                                                                         |      |     |      |      |     |
|-------|--------------|--------------|-----------|-------------------------------------------------------------------------|------|-----|------|------|-----|
| 7_113 | gi_119887639 | XM_587821    | TANK      | Traf family member-associated nfkb activator                            | 0.00 | 4.5 | -1.3 | -5.7 | --- |
| 7_114 | gi_115497925 | NM_001076102 | EPS8      | Epidermal growth factor receptor pathway substrate 8                    | 0.00 | 6.0 | 1.1  | -5.7 | --- |
| 7_115 | gi_119907935 | XM_001253806 | OR4A47    | Olfactory receptor, family 4, subfamily a, member 47                    | 0.00 | 4.8 | -1.2 | -5.7 | --- |
| 7_116 | gi_119914992 | XM_583261    | TXNRD3    | Thioredoxin reductase 3                                                 | 0.00 | 3.0 | -1.9 | -5.7 | --- |
| 7_117 | gi_119924693 | XM_001255886 | LOC788998 | Similar to olfactory receptor mor210-5                                  | 0.00 | 4.8 | -1.2 | -5.7 | --- |
| 7_118 | gi_119892513 | XM_001254983 | Olfr802   | Olfactory receptor 802                                                  | 0.00 | 4.3 | -1.3 | -5.7 | --- |
| 7_119 | gi_119903539 | XM_607432    | LOC528994 | Hypothetical protein                                                    | 0.00 | 4.8 | -1.2 | -5.7 | --- |
| 7_120 | gi_119889996 | XR_028184    | LOC508347 | Similar to interferon-induced protein 44-like                           | 0.00 | 5.5 | 1.0  | -5.6 | --- |
| 7_121 | gi_119901657 | XM_595033    | IPCEF1    | Interaction protein for cytohesin exchange factors 1                    | 0.00 | 5.0 | -1.1 | -5.6 | --- |
| 7_122 | gi_82617557  | NM_205774    | LOC404073 | Riken cDNA 1700024p04 gene                                              | 0.00 | 5.0 | -1.1 | -5.6 | --- |
| 7_123 | gi_31442874  | NM_174655    | SLC24A1   | Solute carrier family 24 (sodium/potassium/calcium exchanger), member 1 | 0.00 | 3.6 | -1.5 | -5.6 | --- |
| 7_124 | gi_119922456 | XM_868862    | OR8G1     | Olfactory receptor, family 8, subfamily g, member 1                     | 0.00 | 4.0 | -1.4 | -5.5 | --- |
| 7_125 | gi_119938335 | XM_001257058 | LOC790639 | Similar to pol; truncated polymerase                                    | 0.00 | 4.3 | -1.3 | -5.5 | --- |
| 7_126 | gi_119937909 | XM_001256935 | LOC790478 | Hypothetical protein                                                    | 0.00 | 5.3 | 1.0  | -5.4 | --- |
| 7_127 | gi_119892561 | XM_001255399 | OR6C74    | Olfactory receptor, family 6, subfamily c, member 74                    | 0.00 | 5.3 | 1.0  | -5.4 | --- |
| 7_128 | gi_76685850  | XM_599512    | Olfr1178  | Olfactory receptor 1178                                                 | 0.00 | 5.1 | -1.1 | -5.4 | --- |
| 7_129 | gi_119926161 | XM_589549    | OR4L1     | Olfactory receptor, family 4, subfamily l, member 1                     | 0.00 | 4.6 | -1.2 | -5.4 | --- |
| 7_130 | gi_61877384  | XM_591641    | LOC513884 | Similar to seven transmembrane helix receptor                           | 0.00 | 3.9 | -1.4 | -5.4 | --- |
| 7_131 | gi_148233351 | NM_001098001 | FAP       | Fibroblast activation protein, alpha                                    | 0.00 | 4.8 | -1.1 | -5.4 | --- |
| 7_132 | gi_119915305 | XR_028046    | RUNX2     | Similar to runt-related transcription factor 2                          | 0.00 | 6.3 | 1.2  | -5.4 | --- |
| 7_133 | gi_31340693  | NM_174701    | HSD17B14  | Hydroxysteroid (17-beta) dehydrogenase 14                               | 0.00 | 3.0 | -1.8 | -5.3 | --- |
| 7_134 | gi_119917348 | XM_583388    | GPR146    | G protein-coupled receptor 146                                          | 0.00 | 2.9 | -1.9 | -5.3 | --- |
| 7_135 | gi_118151305 | NM_001078119 | FBXO16    | F-box protein 16                                                        | 0.00 | 3.2 | -1.6 | -5.3 | --- |
| 7_136 | gi_119895380 | XM_001255445 | OR2T4     | Olfactory receptor, family 2, subfamily t, member 4                     | 0.00 | 4.5 | -1.2 | -5.3 | --- |
| 7_137 | gi_149642672 | NM_001099071 | MAP3K8    | Mitogen-activated protein kinase kinase kinase 8                        | 0.00 | 5.5 | 1.0  | -5.3 | --- |
| 7_138 | gi_76657295  | XM_869298    | Olfr890   | Olfactory receptor 890                                                  | 0.00 | 4.1 | -1.3 | -5.3 | ↑   |
| 7_139 | gi_157279948 | NM_001105020 | KRTAP9L3  | Keratin associated protein 9-1                                          | 0.00 | 3.6 | -1.5 | -5.2 | --- |
| 7_140 | gi_76678008  | XM_584199    | OR10A3    | Olfactory receptor, family 10, subfamily a, member 3                    | 0.00 | 4.8 | -1.1 | -5.2 | --- |
| 7_141 | gi_119910279 | XM_600249    | DPY19L3   | Dpy-19-like 3 (c. Elegans)                                              | 0.00 | 3.8 | -1.4 | -5.2 | --- |
| 7_142 | gi_119922019 | XM_868429    | OR8U8     | Olfactory receptor, family 8, subfamily u, member 8                     | 0.00 | 4.5 | -1.1 | -5.2 | --- |
| 7_143 | gi_119902030 | XR_028230    | REC8      | Rec8 homolog (yeast)                                                    | 0.00 | 3.5 | -1.5 | -5.2 | --- |
| 7_144 | gi_119931138 | XM_597087    | OR8G2     | Olfactory receptor, family 8, subfamily g, member 2                     | 0.00 | 4.9 | -1.0 | -5.2 | --- |
| 7_145 | gi_119889564 | XM_001254074 | CD58      | CD58 molecule                                                           | 0.00 | 2.6 | -2.0 | -5.2 | --- |
| 7_146 | gi_119892967 | XM_870975    | DUSP16    | Dual specificity phosphatase 16                                         | 0.00 | 6.0 | 1.2  | -5.1 | --- |
| 7_147 | gi_27806678  | NM_174026    | CSF1      | Colony stimulating factor 1 (macrophage)                                | 0.00 | 5.0 | 1.0  | -5.1 | --- |
| 7_148 | gi_119915547 | XM_601579    | LOC523283 | Similar to olfactory receptor olfr1365                                  | 0.00 | 4.2 | -1.2 | -5.1 | --- |
| 7_149 | gi_119918606 | XM_868011    | Dusp13    | Dual specificity phosphatase 13 (rat)                                   | 0.00 | 3.8 | -1.3 | -5.1 | --- |
| 7_150 | gi_119927681 | XM_001254405 | LOC786840 | Similar to Cflf4                                                        | 0.00 | 4.7 | -1.1 | -5.1 | --- |
| 7_151 | gi_119906190 | XM_588232    | PARP10    | Poly (adp-ribose) polymerase family, member 10                          | 0.00 | 2.9 | -1.7 | -5.0 | --- |
| 7_152 | gi_119892577 | XM_001255552 | Olfr1070  | Olfactory receptor 1070                                                 | 0.00 | 4.9 | 1.0  | -5.0 | --- |
| 7_153 | gi_119915596 | XM_001253001 | Olfr129   | Olfactory receptor 129                                                  | 0.00 | 3.1 | -1.6 | -5.0 | --- |
| 7_154 | gi_149642646 | NM_001099168 | RBM43     | Rna binding motif protein 43                                            | 0.00 | 3.8 | -1.3 | -5.0 | --- |
| 7_155 | gi_119928883 | XM_581609    | LOC505334 | Hypothetical protein                                                    | 0.00 | 2.5 | -2.0 | -5.0 | ↑   |
| 7_156 | gi_166157493 | NM_001113766 | TMC2      | Transmembrane channel-like 2                                            | 0.00 | 3.2 | -1.6 | -5.0 | --- |
| 7_157 | gi_119915598 | XM_588373    | LOC511103 | Similar to olfactory receptor, family 2, subfamily j, member 3          | 0.00 | 2.9 | -1.7 | -4.9 | --- |
| 7_158 | gi_119891937 | XM_588753    | ALX1      | Alx homeobox 1                                                          | 0.00 | 5.1 | 1.0  | -4.9 | --- |
| 7_159 | gi_156120432 | NM_001101892 | C1orf109  | Chromosome 1 open reading frame 109                                     | 0.00 | 4.3 | -1.1 | -4.9 | --- |
| 7_160 | gi_157427785 | NM_001105329 | CSNK1G3   | Casein kinase 1, gamma 3                                                | 0.00 | 3.6 | -1.4 | -4.9 | --- |
| 7_161 | gi_76670917  | XM_605163    | LOC526789 | Hypothetical protein                                                    | 0.00 | 3.1 | -1.6 | -4.8 | --- |
| 7_162 | gi_162287311 | NM_001080908 | CASB      | Carbonic anhydrase vb, mitochondrial                                    | 0.00 | 4.1 | -1.2 | -4.8 | --- |
| 7_163 | gi_160707930 | NM_001110785 | IL6R      | Interleukin 6 receptor                                                  | 0.00 | 2.9 | -1.7 | -4.8 | --- |
| 7_164 | gi_119889431 | XM_585905    | C1orf51   | Chromosome 1 open reading frame 51                                      | 0.00 | 3.4 | -1.4 | -4.8 | --- |
| 7_165 | gi_119923401 | XM_001249461 | SHISA3    | Shisa homolog 3 (xenopus laevis)                                        | 0.00 | 4.4 | -1.1 | -4.8 | --- |
| 7_166 | gi_119892314 | XM_582025    | PTPRB     | Protein tyrosine phosphatase, receptor type, b                          | 0.00 | 4.6 | -1.0 | -4.8 | --- |
| 7_167 | gi_119912777 | XM_586217    | LOC509283 | Similar to chromosome 17 open reading frame 27                          | 0.00 | 6.4 | 1.3  | -4.8 | --- |
| 7_168 | gi_119909812 | XM_582583    | LOC506171 | Similar to phospholipase c, gamma 2                                     | 0.00 | 2.8 | -1.7 | -4.8 | --- |
| 7_169 | gi_119915205 | XM_001250256 | KCNK5     | Potassium channel, subfamily k, member 5                                | 0.00 | 3.1 | -1.5 | -4.8 | --- |
| 7_170 | gi_119917845 | XR_027657    | LOC539889 | Hypothetical protein                                                    | 0.00 | 3.4 | -1.4 | -4.8 | --- |
| 7_171 | gi_119929609 | XM_611004    | OR4A47    | Olfactory receptor, family 4, subfamily a, member 47                    | 0.00 | 4.8 | 1.0  | -4.8 | --- |
| 7_172 | gi_119879472 | XM_589632    | ZDHHC23   | Similar to membrane-associated dhhc23 zinc finger protein               | 0.00 | 5.5 | 1.2  | -4.7 | --- |
| 7_173 | gi_139948994 | NM_001083697 | MGC157405 | Pregnancy-associated glycoprotein                                       | 0.00 | 4.0 | -1.2 | -4.7 | --- |
| 7_174 | gi_119926223 | XM_588414    | OR2J2     | Olfactory receptor, family 2, subfamily j, member 2                     | 0.00 | 2.9 | -1.6 | -4.7 | ↑   |
| 7_175 | gi_148539985 | NM_174512    | CDK5R1    | Cyclin-dependent kinase 5, regulatory subunit 1 (p35)                   | 0.00 | 2.6 | -1.8 | -4.7 | --- |
| 7_176 | gi_116003876 | NM_001076828 | PARP9     | Poly (adp-ribose) polymerase family, member 9                           | 0.00 | 4.2 | -1.1 | -4.7 | --- |
| 7_177 | gi_157427889 | NM_001105382 | Prune2    | Prune homolog 2 (drosophila) (rat)                                      | 0.00 | 7.8 | 1.7  | -4.7 | --- |
| 7_178 | gi_119930582 | XM_001255843 | Olfr591   | Olfactory receptor 591                                                  | 0.00 | 4.5 | 1.0  | -4.7 | --- |
| 7_179 | gi_119925715 | XM_001255793 | OR5F1     | Olfactory receptor, family 5, subfamily f, member 1                     | 0.00 | 3.7 | -1.3 | -4.6 | --- |
| 7_180 | gi_118151377 | NM_001077829 | LYZ1      | Lysozyme 1 (lyz1)                                                       | 0.00 | 5.0 | 1.1  | -4.6 | --- |
| 7_181 | gi_119892521 | XM_001255098 | Olfr1012  | Olfactory receptor 1012                                                 | 0.00 | 4.5 | 1.0  | -4.6 | --- |
| 7_182 | gi_119916743 | XM_864316    | SOCs1     | Suppressor of cytokine signaling 1                                      | 0.00 | 8.9 | 2.0  | -4.6 | ↑   |
| 7_183 | gi_119922658 | XM_001256086 | OR5W2     | Olfactory receptor, family 5, subfamily w, member 2                     | 0.00 | 3.6 | -1.3 | -4.6 | --- |
| 7_184 | gi_114051785 | NM_001046630 | Tas2r122  | Taste receptor, type 2, member 122                                      | 0.00 | 4.5 | 1.0  | -4.5 | --- |
| 7_185 | gi_119895839 | XR_028142    | LOC353967 | Similar to kiaa0715 protein                                             | 0.00 | 4.3 | -1.0 | -4.5 | --- |
| 7_186 | gi_119892689 | XM_001251716 | LOC783379 | Similar to kiaa1033 protein                                             | 0.00 | 2.3 | -2.0 | -4.5 | --- |
| 7_187 | gi_115496313 | NM_001075738 | Gstt3     | Glutathione s-transferase, theta 3                                      | 0.00 | 3.7 | -1.2 | -4.5 | --- |
| 7_188 | gi_119915666 | XM_580689    | UBD       | Ubiquitin D                                                             | 0.00 | 3.3 | -1.4 | -4.5 | --- |
| 7_189 | gi_119892596 | XM_867721    | ITGA7     | Integrin, alpha 7                                                       | 0.00 | 3.8 | -1.2 | -4.5 | --- |
| 7_190 | gi_119900588 | XM_588491    | LZTS1     | Leucine zipper, putative tumor suppressor 1                             | 0.00 | 2.9 | -1.5 | -4.5 | --- |
| 7_191 | gi_313433556 | NM_177510    | GCNT1     | Glucosaminyl (n-acetyl) transferase 1, core 2                           | 0.00 | 5.1 | 1.1  | -4.4 | --- |
| 7_192 | gi_119901485 | XM_001253189 | LOC785047 | Similar to trace amine receptor 8                                       | 0.00 | 3.7 | -1.2 | -4.4 | --- |
| 7_193 | gi_119902191 | XM_609796    | Olfr731   | Olfactory receptor 731                                                  | 0.00 | 4.5 | 1.0  | -4.4 | --- |
| 7_194 | gi_119901577 | XM_614057    | GPR126    | G protein-coupled receptor 126                                          | 0.00 | 3.3 | -1.3 | -4.4 | --- |
| 7_195 | gi_119924379 | XM_001254841 | OR5T1     | Olfactory receptor, family 5, subfamily t, member 1                     | 0.00 | 4.0 | -1.1 | -4.4 | --- |
| 7_196 | gi_119922460 | XM_001250569 | OR8G2     | Olfactory receptor, family 8, subfamily g, member 2                     | 0.00 | 3.9 | -1.1 | -4.4 | --- |
| 7_197 | gi_122692322 | NM_001080336 | LOC781146 | Lysozyme                                                                | 0.00 | 3.5 | -1.3 | -4.4 | --- |
| 7_198 | gi_76679710  | XM_606544    | PRAMEF12  | Prame family member 12                                                  | 0.00 | 3.9 | -1.1 | -4.4 | --- |
| 7_199 | gi_119926726 | XM_599805    | NUP210    | Nucleoporin 210kda                                                      | 0.00 | 4.3 | 1.0  | -4.4 | --- |
| 7_200 | gi_119921161 | XM_001254952 | LOC787604 | Similar to olfactory receptor olr1075                                   | 0.00 | 2.8 | -1.5 | -4.4 | --- |
| 7_201 | gi_119874947 | XM_604589    | LOC526226 | Similar to histone h4                                                   | 0.00 | 2.8 | -1.5 | -4.4 | --- |

|       |              |              |           |                                                                     |      |     |      |      |     |
|-------|--------------|--------------|-----------|---------------------------------------------------------------------|------|-----|------|------|-----|
| 7_202 | gi_116003864 | NM_001076823 | TAGAP     | T-cell activation rhogtpase activating protein                      | 0.00 | 7.0 | 1.6  | -4.3 | --- |
| 7_203 | gi_119918717 | XM_599400    | Olftr214  | Olfactory receptor 214                                              | 0.00 | 3.4 | -1.3 | -4.3 | --- |
| 7_204 | gi_119895410 | XM_001255686 | Olftr30   | Olfactory receptor 30                                               | 0.00 | 3.7 | -1.2 | -4.3 | --- |
| 7_205 | gi_119933344 | XM_001256835 | Olr94     | Olfactory receptor 94                                               | 0.00 | 3.7 | -1.2 | -4.3 | --- |
| 7_206 | gi_119879605 | XM_865427    | OSBPL11   | Oxysterol binding protein-like 11                                   | 0.00 | 3.1 | -1.4 | -4.3 | --- |
| 7_207 | gi_115497767 | NM_001075224 | PPP1R13L  | Protein phosphatase 1, regulatory (inhibitor) subunit 13 like       | 0.00 | 2.3 | -1.9 | -4.3 | --- |
| 7_208 | gi_66792729  | NM_001024506 | IRF9      | Interferon regulatory factor 9                                      | 0.00 | 4.0 | -1.1 | -4.3 | --- |
| 7_209 | gi_119894006 | XM_612336    | UGT2B4    | Udp glucuronosyltransferase 2 family, polypeptide b4                | 0.00 | 2.8 | -1.5 | -4.3 | --- |
| 7_210 | gi_119902087 | XM_605073    | LOC526700 | Similar to olfactory receptor mor118-1                              | 0.00 | 3.1 | -1.4 | -4.3 | --- |
| 7_211 | gi_119917902 | XM_614294    | LOC534506 | Similar to KIAA0598 protein, transcript variant 1                   | 0.00 | 2.9 | -1.5 | -4.3 | --- |
| 7_212 | gi_119902917 | XM_869926    | BATF      | Basic leucine zipper transcription factor, atf-like                 | 0.00 | 3.3 | -1.3 | -4.3 | --- |
| 7_213 | gi_115497501 | NM_001075911 | NR4A1     | Nuclear receptor subfamily 4, group a, member 1                     | 0.00 | 2.7 | -1.6 | -4.3 | --- |
| 7_214 | gi_114052379 | NM_001046538 | RAB15     | Rab15, member ras oncogene family                                   | 0.00 | 2.5 | -1.7 | -4.3 | --- |
| 7_215 | gi_139949042 | NM_001083711 | TNFAIP8   | Tumor necrosis factor, alpha-induced protein 8                      | 0.00 | 2.4 | -1.7 | -4.2 | --- |
| 7_216 | gi_119923777 | XM_001250364 | LOC783509 | Similar to I antigen family, member 3                               | 0.00 | 2.5 | -1.7 | -4.2 | --- |
| 7_217 | gi_119924442 | XM_001251569 | TAAR8     | Trace amine associated receptor 8                                   | 0.00 | 3.9 | -1.1 | -4.2 | --- |
| 7_218 | gi_76657212  | XM_610318    | Olftr921  | Olfactory receptor 921                                              | 0.00 | 3.5 | -1.2 | -4.2 | --- |
| 7_219 | gi_119904452 | XM_617702    | DGKH      | Diacylglycerol kinase, eta                                          | 0.01 | 2.3 | -1.9 | -4.2 | --- |
| 7_220 | gi_119879589 | XM_590786    | MYLK      | Myosin, light polypeptide kinase (mylk)                             | 0.00 | 2.6 | -1.6 | -4.2 | --- |
| 7_221 | gi_119920960 | XM_001249726 | ORS2A5    | Olfactory receptor, family 52, subfamily a, member 5                | 0.00 | 4.2 | 1.0  | -4.2 | --- |
| 7_222 | gi_119894644 | XM_001256245 | LOC789504 | Similar to bc85395_3                                                | 0.00 | 3.7 | -1.1 | -4.2 | --- |
| 7_223 | gi_164518983 | NM_001113297 | ACBD7     | Acyl-coa binding domain containing 7                                | 0.00 | 2.5 | -1.7 | -4.2 | --- |
| 7_224 | gi_119900621 | XM_607313    | LOC528877 | Similar to neuron-derived orphan receptor-1 alfa                    | 0.00 | 6.4 | 1.5  | -4.2 | --- |
| 7_225 | gi_119902066 | XM_589218    | ZFH2      | Zinc finger homeobox 2                                              | 0.00 | 2.4 | -1.7 | -4.2 | --- |
| 7_226 | gi_119925108 | XM_590561    | LOC512948 | Similar to olf4                                                     | 0.00 | 4.0 | -1.0 | -4.2 | --- |
| 7_227 | gi_119902240 | XM_605072    | Olftr49   | Olfactory receptor 49                                               | 0.01 | 2.3 | -1.8 | -4.2 | --- |
| 7_228 | gi_119922646 | XM_867468    | LOC615605 | Similar to olfactory receptor mor231-1                              | 0.00 | 3.5 | -1.2 | -4.1 | --- |
| 7_229 | gi_115497413 | NM_001076421 | SPIC      | Spi-c transcription factor (Spi-1/pu.1 related)                     | 0.00 | 4.5 | 1.1  | -4.1 | --- |
| 7_230 | gi_119920986 | XM_591949    | LOC514146 | Similar to olfactory receptor mor30-1                               | 0.00 | 3.0 | -1.4 | -4.1 | --- |
| 7_231 | gi_156121338 | NM_001102348 | ARL4C     | Adp-ribosylation factor-like 4c                                     | 0.00 | 5.6 | 1.4  | -4.1 | --- |
| 7_232 | gi_119922122 | XM_584568    | Olftr513  | Olfactory receptor 513                                              | 0.00 | 4.0 | 1.0  | -4.1 | --- |
| 7_233 | gi_119901491 | XM_865063    | LOC613867 | Similar to trace amine receptor 8                                   | 0.00 | 3.7 | -1.1 | -4.1 | --- |
| 7_234 | gi_119889139 | XM_592982    | OR10K1    | Olfactory receptor, family 10, subfamily k, member 1                | 0.00 | 3.4 | -1.2 | -4.1 | --- |
| 7_235 | gi_119919114 | XM_870538    | LOC618211 | Hypothetical protein                                                | 0.00 | 2.6 | -1.6 | -4.1 | --- |
| 7_236 | gi_119919246 | XM_001254190 | LOC788447 | Hypothetical protein                                                | 0.00 | 3.6 | -1.1 | -4.0 | --- |
| 7_237 | gi_48374082  | NM_001001440 | ANXA4     | Annexin a4                                                          | 0.00 | 2.4 | -1.7 | -4.0 | --- |
| 7_238 | gi_119924438 | XM_001251459 | LOC782807 | Similar to trace amine receptor 8                                   | 0.00 | 3.2 | -1.3 | -4.0 | --- |
| 7_239 | gi_119890020 | XM_606535    | WLS       | Hypothetical protein                                                | 0.00 | 3.4 | -1.2 | -4.0 | --- |
| 7_240 | gi_139948327 | NM_001083728 | MAPK10    | Mitogen-activated protein kinase 10                                 | 0.00 | 3.1 | -1.3 | -4.0 | --- |
| 7_241 | gi_119929037 | XM_001250178 | LOC783299 | Similar to b7 olfactory receptor                                    | 0.00 | 4.6 | 1.1  | -4.0 | --- |
| 7_242 | gi_119892563 | XM_001255417 | OR6C70    | Olfactory receptor, family 6, subfamily c, member 70                | 0.00 | 3.7 | -1.1 | -4.0 | --- |
| 7_243 | gi_119907486 | XM_580632    | OR2D2     | Olfactory receptor, family 2, subfamily d, member 2                 | 0.01 | 2.3 | -1.8 | -4.0 | --- |
| 7_244 | gi_119912471 | XM_584593    | LOC539069 | Similar to copper amine oxidase                                     | 0.00 | 3.9 | 1.0  | -4.0 | --- |
| 7_245 | gi_119907337 | XM_001254939 | Olftr676  | Olfactory receptor 676                                              | 0.00 | 3.0 | -1.3 | -4.0 | --- |
| 7_246 | gi_119924385 | XM_583364    | OR5I1     | Olfactory receptor, family 5, subfamily i, member 1                 | 0.00 | 4.3 | 1.1  | -4.0 | --- |
| 7_247 | gi_119901487 | XM_001253215 | LOC785080 | Similar to trace amine associated receptor 6                        | 0.00 | 3.2 | -1.2 | -4.0 | --- |
| 7_248 | gi_119926100 | XR_028522    | LOC787388 | Similar to olfactory receptor olfr1174                              | 0.00 | 3.1 | -1.3 | -4.0 | --- |
| 7_249 | gi_119875275 | XM_609842    | BACH1     | Btd and cnc homology 1, basic leucine zipper transcription factor 1 | 0.00 | 2.3 | -1.7 | -4.0 | --- |
| 7_250 | gi_119914325 | XM_616073    | SCN11A    | Sodium channel, voltage-gated, type xi, alpha subunit               | 0.00 | 3.7 | -1.1 | -4.0 | --- |
| 7_251 | gi_119902193 | XM_001252966 | OR4K2     | Olfactory receptor, family 4, subfamily k, member 2                 | 0.00 | 4.3 | 1.1  | -4.0 | --- |
| 7_252 | gi_119923020 | XM_001253097 | Olftr1303 | Olfactory receptor 1303                                             | 0.00 | 4.1 | 1.0  | -4.0 | --- |
| 7_253 | gi_115496034 | NM_001076311 | SNX24     | Sorting nexin 24                                                    | 0.00 | 6.4 | 1.6  | -4.0 | --- |
| 7_254 | gi_119907606 | XM_590174    | Olr36     | Olfactory receptor 36                                               | 0.00 | 3.2 | -1.2 | -3.9 | --- |
| 7_255 | gi_119901591 | XM_590527    | STX11     | Syntaxin 11                                                         | 0.00 | 4.5 | 1.1  | -3.9 | --- |
| 7_256 | gi_119894463 | XM_597995    | PBX4      | Pre-b-cell leukemia homeobox 4                                      | 0.00 | 2.7 | -1.4 | -3.9 | --- |
| 7_257 | gi_119890208 | XM_588670    | CC2D1B    | Coiled-coil and c2 domain containing 1b                             | 0.00 | 2.9 | -1.3 | -3.9 | --- |
| 7_258 | gi_119896062 | XR_027676    | LOC782371 | Hypothetical protein                                                | 0.00 | 3.5 | -1.1 | -3.9 | --- |
| 7_259 | gi_119922219 | XM_585077    | LOC508315 | Similar to olfactory receptor mor232-3                              | 0.00 | 3.0 | -1.3 | -3.9 | --- |
| 7_260 | gi_119921045 | XM_593866    | OR52A1    | Olfactory receptor, family 52, subfamily a, member 1                | 0.00 | 3.4 | -1.1 | -3.9 | --- |
| 7_261 | gi_32189319  | NM_181033    | LPNH3     | Lathropilin 3                                                       | 0.00 | 3.6 | -1.1 | -3.9 | --- |
| 7_262 | gi_119921882 | XM_001256453 | LOC789812 | Similar to olfactory receptor mor262-6                              | 0.00 | 3.9 | 1.0  | -3.9 | --- |
| 7_263 | gi_136256478 | NM_001077899 | NFE2L3    | Nuclear factor (erythroid-derived 2)-like 3                         | 0.00 | 4.8 | 1.2  | -3.9 | --- |
| 7_264 | gi_119889279 | XM_001253716 | NUP210L   | Nucleoporin 210kda-like                                             | 0.00 | 2.6 | -1.5 | -3.9 | --- |
| 7_265 | gi_119892579 | XM_001255560 | LOC788524 | Similar to cor9k3 olfactory receptor family 9 subfamily k-like      | 0.00 | 4.1 | 1.1  | -3.9 | --- |
| 7_266 | gi_119906802 | XM_869405    | SLC26A7   | Solute carrier family 26, member 7                                  | 0.01 | 2.1 | -1.8 | -3.9 | --- |
| 7_267 | gi_119892535 | XM_001255202 | OR6C1     | Olfactory receptor, family 6, subfamily c, member 1                 | 0.00 | 3.7 | -1.1 | -3.9 | --- |
| 7_268 | gi_119903343 | XM_609234    | SULT6B1   | Sulfotransferase family, cytosolic, 6b, member 1                    | 0.00 | 3.1 | -1.3 | -3.9 | --- |
| 7_269 | gi_119910954 | XM_001254677 | Vmn1r233  | Similar to pheromone receptor                                       | 0.00 | 3.0 | -1.3 | -3.9 | --- |
| 7_270 | gi_119931962 | XM_587211    | GPCRLTM7  | Putative olfactory receptor GPCRLTM7                                | 0.00 | 4.2 | 1.1  | -3.9 | --- |
| 7_271 | gi_119905969 | XM_604955    | TTPAL     | Tocopherol (alpha) transfer protein-like                            | 0.00 | 2.3 | -1.7 | -3.8 | --- |
| 7_272 | gi_119907359 | XM_001255071 | Olftr661  | Olfactory receptor 661                                              | 0.00 | 3.9 | 1.0  | -3.8 | --- |
| 7_273 | gi_118151441 | NM_001078159 | LYZ       | Lysozyme                                                            | 0.01 | 2.2 | -1.7 | -3.8 | --- |
| 7_274 | gi_119922109 | XM_001250343 | LOC781841 | Hypothetical protein                                                | 0.00 | 2.4 | -1.6 | -3.8 | --- |
| 7_275 | gi_77736454  | NM_001034755 | MOBKLC2C  | Mob1, mps one binder kinase activator-like 2c (yeast)               | 0.00 | 2.6 | -1.5 | -3.8 | --- |
| 7_276 | gi_126723003 | NM_001082454 | CCR4L     | CCR4 carbon catabolite repression 4-like (s. Cerevisiae)            | 0.00 | 4.6 | 1.2  | -3.8 | --- |
| 7_277 | gi_119921039 | XM_001252349 | LOC783898 | Similar to mor 3beta4                                               | 0.00 | 3.7 | 1.0  | -3.8 | --- |
| 7_278 | gi_119925825 | XM_001251152 | Olftr1351 | Olfactory receptor 1351                                             | 0.00 | 2.7 | -1.4 | -3.8 | --- |
| 7_279 | gi_119895944 | XM_001250359 | ELL2      | Elongation factor, rna polymerase ii, 2                             | 0.00 | 3.9 | 1.0  | -3.8 | --- |
| 7_280 | gi_119887309 | XM_585327    | NIPA1     | Non imprinted in prader-willi/angelman syndrome 1                   | 0.00 | 2.4 | -1.6 | -3.8 | --- |
| 7_281 | gi_119901496 | XM_001253352 | LOC785282 | Similar to trace amine receptor 8                                   | 0.00 | 3.0 | -1.2 | -3.8 | --- |
| 7_282 | gi_119915592 | XM_001252942 | OR2J3     | Olfactory receptor, family 2, subfamily j, member 3                 | 0.00 | 2.9 | -1.3 | -3.8 | --- |
| 7_283 | gi_119916182 | XM_866291    | PSMA8     | Proteasome (prosome, macropain) subunit, alpha type, 8              | 0.00 | 3.4 | -1.1 | -3.8 | --- |
| 7_284 | gi_76674338  | XM_865987    | OR7D4     | Olfactory receptor, family 7, subfamily d, member 4                 | 0.00 | 3.3 | -1.1 | -3.8 | --- |
| 7_285 | gi_114052944 | NM_001046095 | CXCL16    | Chemokine (c-x-c motif) ligand 16                                   | 0.00 | 2.3 | -1.6 | -3.8 | --- |
| 7_286 | gi_119925385 | XM_866146    | LOC614592 | Similar to olfactory receptor olr1414                               | 0.00 | 2.7 | -1.4 | -3.7 | --- |
| 7_287 | gi_119922177 | XM_001253330 | LOC785259 | Hypothetical protein                                                | 0.00 | 3.0 | -1.3 | -3.7 | --- |
| 7_288 | gi_119907937 | XM_591624    | OR4C13    | Olfactory receptor, family 4, subfamily c, member 13                | 0.00 | 3.6 | -1.1 | -3.7 | --- |
| 7_289 | gi_119902201 | XM_001253086 | OR4K14    | Olfactory receptor, family 4, subfamily k, member 14                | 0.00 | 3.3 | -1.1 | -3.7 | --- |
| 7_290 | gi_77404220  | NM_001034056 | MS4A8B    | Membrane-spanning 4-domains, subfamily a, member 8b                 | 0.00 | 2.3 | -1.6 | -3.7 | --- |



|       |              |              |           |                                                                                       |      |     |      |      |     |
|-------|--------------|--------------|-----------|---------------------------------------------------------------------------------------|------|-----|------|------|-----|
| 7_291 | gi_119884978 | XM_001253176 | GPR87     | G protein-coupled receptor 87                                                         | 0.00 | 3.6 | 1.0  | -3.7 | --- |
| 7_292 | gi_119890516 | XM_868290    | KCNJ13    | Potassium inwardly-rectifying channel, subfamily j, member 13                         | 0.02 | 2.1 | -1.8 | -3.7 | --- |
| 7_293 | gi_119894665 | XM_583975    | LOC507378 | Similar to Cfolf4                                                                     | 0.00 | 3.1 | -1.2 | -3.7 | --- |
| 7_294 | gi_119923034 | XM_001253258 | LOC785145 | Similar to seven transmembrane helix receptor                                         | 0.00 | 2.3 | -1.6 | -3.7 | --- |
| 7_295 | gi_119895352 | XM_591451    | OR2T8     | Olfactory receptor, family 2, subfamily t, member 8                                   | 0.00 | 3.5 | -1.1 | -3.7 | --- |
| 7_296 | gi_119908082 | XM_001256153 | OR5L1     | Olfactory receptor, family 5, subfamily l, member 1                                   | 0.00 | 2.6 | -1.4 | -3.7 | --- |
| 7_297 | gi_119915994 | XM_001256549 | LOC789936 | Similar to olfactory receptor 1160                                                    | 0.00 | 2.5 | -1.5 | -3.7 | --- |
| 7_298 | gi_119907040 | XM_590126    | ZC3H12C   | Similar to KIAA1726 protein, transcript variant 1                                     | 0.00 | 5.1 | 1.4  | -3.6 | --- |
| 7_299 | gi_119910056 | XM_001250846 | NLRCS     | Nlr family, card domain containing 5                                                  | 0.00 | 4.3 | 1.2  | -3.6 | --- |
| 7_300 | gi_119910346 | XM_001253667 | ZBTB32    | Similar to testis zinc finger protein                                                 | 0.00 | 2.3 | -1.6 | -3.6 | --- |
| 7_301 | gi_114703724 | NM_174509    | CACNB3    | Calcium channel, voltage-dependent, beta 3 subunit                                    | 0.00 | 2.7 | -1.3 | -3.6 | --- |
| 7_302 | gi_156121078 | NM_001102216 | ZNF565    | Zinc finger protein 565                                                               | 0.00 | 2.4 | -1.5 | -3.6 | --- |
| 7_303 | gi_119924436 | XM_001251414 | TAAR8     | Trace amine associated receptor 8                                                     | 0.00 | 3.4 | -1.1 | -3.6 | --- |
| 7_304 | gi_119924775 | XM_587889    | LOC510712 | Similar to olf4                                                                       | 0.00 | 3.4 | -1.1 | -3.6 | --- |
| 7_305 | gi_31342998  | NM_174030    | CTGF      | Connective tissue growth factor                                                       | 0.00 | 2.6 | -1.4 | -3.6 | --- |
| 7_306 | gi_27881411  | NM_174294    | CSN3      | Casein kappa                                                                          | 0.00 | 2.5 | -1.4 | -3.6 | --- |
| 7_307 | gi_119921576 | XM_583518    | KIAA1147  | KIAA1147                                                                              | 0.00 | 4.8 | 1.3  | -3.6 | --- |
| 7_308 | gi_119921932 | XM_871139    | Olfir768  | Olfactory receptor 768                                                                | 0.00 | 2.9 | -1.2 | -3.6 | --- |
| 7_309 | gi_134085668 | NM_001083451 | RORC      | Rar-related orphan receptor c                                                         | 0.02 | 2.0 | -1.8 | -3.6 | --- |
| 7_310 | gi_119923914 | XM_001255594 | OR4A5     | Olfactory receptor, family 4, subfamily a, member 5                                   | 0.00 | 3.1 | -1.2 | -3.6 | --- |
| 7_311 | gi_119912384 | XM_586375    | CCDC103   | Coiled-coil domain containing 103                                                     | 0.01 | 2.0 | -1.8 | -3.6 | --- |
| 7_312 | gi_156120686 | NM_001102020 | CLIP4     | Cap-gly domain containing linker protein family, member 4                             | 0.00 | 2.4 | -1.5 | -3.6 | --- |
| 7_313 | gi_119905750 | XM_001253180 | C20orf112 | Chromosome 20 open reading frame 112                                                  | 0.00 | 2.7 | -1.3 | -3.6 | --- |
| 7_314 | gi_119892451 | XM_588270    | STAT2     | Signal transducer and activator of transcription 2, 113kda                            | 0.00 | 2.9 | -1.2 | -3.5 | --- |
| 7_315 | gi_119889480 | XM_868112    | LOC616149 | Hypothetical protein                                                                  | 0.01 | 2.3 | -1.6 | -3.5 | --- |
| 7_316 | gi_119921163 | XM_869117    | LOC616964 | Similar to cfolf4                                                                     | 0.00 | 2.6 | -1.4 | -3.5 | --- |
| 7_317 | gi_119906071 | XM_586129    | B4GALT5   | Udp-gal:betaglcnac beta 1,4- galactosyltransferase, polypeptide 5                     | 0.00 | 6.8 | 1.9  | -3.5 | --- |
| 7_318 | gi_110347578 | NM_174257    | S100G     | S100 calcium binding protein g                                                        | 0.01 | 2.1 | -1.7 | -3.5 | --- |
| 7_319 | gi_115496050 | NM_001076208 | NR4A2     | Nuclear receptor subfamily 4, group a, member 2                                       | 0.00 | 3.4 | 1.0  | -3.5 | --- |
| 7_320 | gi_156071442 | NM_001101661 | DEFB119   | Defensin, beta 119                                                                    | 0.00 | 3.0 | -1.1 | -3.5 | --- |
| 7_321 | gi_119914146 | XM_868259    | RAGE      | Renal tumor antigen                                                                   | 0.00 | 2.6 | -1.3 | -3.5 | --- |
| 7_322 | gi_76679265  | XM_591472    | OR7A10    | Olfactory receptor, family 7, subfamily a, member 10                                  | 0.00 | 2.9 | -1.2 | -3.5 | --- |
| 7_323 | gi_119877840 | XM_616959    | ROBO1     | Roundabout, axon guidance receptor, homolog 1 (drosophila)                            | 0.00 | 2.9 | -1.2 | -3.5 | --- |
| 7_324 | gi_119877632 | XM_603300    | NRIP1     | Nuclear receptor interacting protein 1                                                | 0.00 | 2.1 | -1.7 | -3.5 | --- |
| 7_325 | gi_119920994 | XM_001251099 | OR51T1    | Olfactory receptor, family 51, subfamily t, member 1                                  | 0.00 | 3.5 | 1.0  | -3.5 | --- |
| 7_326 | gi_164448591 | NM_001113258 | FHL1      | Four and a half lim domains 1 (fhl1), transcript variant 1                            | 0.00 | 2.5 | -1.4 | -3.5 | --- |
| 7_327 | gi_119913871 | XM_617995    | AKAP6     | A kinase (prka) anchor protein 6                                                      | 0.00 | 2.9 | -1.2 | -3.5 | --- |
| 7_328 | gi_119902298 | XM_601356    | LOC523062 | Similar to seven transmembrane helix receptor                                         | 0.00 | 3.3 | -1.1 | -3.5 | --- |
| 7_329 | gi_76683775  | XM_586650    | LOC509641 | Similar to olf4                                                                       | 0.01 | 2.2 | -1.6 | -3.5 | --- |
| 7_330 | gi_119919833 | XM_001254041 | LOC786332 | Similar to transmembrane protein with egf-like and two follistatin-like domains 1     | 0.00 | 2.8 | -1.3 | -3.5 | --- |
| 7_331 | gi_119929117 | XM_589033    | OR4A15    | Olfactory receptor, family 4, subfamily a, member 15                                  | 0.00 | 4.0 | 1.2  | -3.5 | --- |
| 7_332 | gi_115496747 | NM_001075692 | MTUS1     | Mitochondrial tumor suppressor 1 (mtus1), nuclear gene encoding mitochondrial protein | 0.00 | 2.3 | -1.5 | -3.4 | --- |
| 7_333 | gi_119918970 | XM_581982    | OR8G5     | Olfactory receptor, family 8, subfamily g, member 5                                   | 0.01 | 2.4 | -1.5 | -3.4 | --- |
| 7_334 | gi_119892519 | XM_001255059 | OR6C76    | Olfactory receptor, family 6, subfamily c, member 76                                  | 0.00 | 3.2 | -1.1 | -3.4 | --- |
| 7_335 | gi_119892525 | XM_001255131 | Olfir802  | Olfactory receptor 802                                                                | 0.00 | 3.2 | -1.1 | -3.4 | --- |
| 7_336 | gi_119889486 | XM_867242    | NOTCH2    | NOTCH 2                                                                               | 0.00 | 2.2 | -1.5 | -3.4 | --- |
| 7_337 | gi_119915359 | XM_583214    | NFKBIE    | Nuclear factor of kappa light polypeptide gene enhancer in b-cells inhibitor, epsilon | 0.00 | 3.9 | 1.2  | -3.4 | --- |
| 7_338 | gi_119910944 | XM_001254581 | Vmn1r67   | Similar to pheromone receptor                                                         | 0.00 | 2.8 | -1.2 | -3.4 | --- |
| 7_339 | gi_119901769 | XM_581038    | MLLT4     | Myeloid/lymphoid or mixed-lineage leukemia translocated to, 4                         | 0.00 | 2.9 | -1.2 | -3.4 | --- |
| 7_340 | gi_119915909 | XM_865312    | IRF4      | Interferon regulatory factor 4                                                        | 0.00 | 4.7 | 1.4  | -3.4 | --- |
| 7_341 | gi_119921525 | XM_001254038 | LOC786324 | Similar to enterocytin                                                                | 0.00 | 3.2 | -1.1 | -3.4 | --- |
| 7_342 | gi_119915588 | XM_001252901 | OR2B3     | Olfactory receptor, family 2, subfamily b, member 3                                   | 0.02 | 2.1 | -1.6 | -3.4 | --- |
| 7_343 | gi_119920962 | XM_581965    | OR52A1    | Olfactory receptor, family 52, subfamily a, member 1                                  | 0.00 | 3.3 | 1.0  | -3.3 | --- |
| 7_344 | gi_119903302 | XM_588244    | CLEC4F    | C-type lectin domain family 4, member f                                               | 0.01 | 2.1 | -1.6 | -3.3 | --- |
| 7_345 | gi_119892583 | XM_001255583 | Olfir1070 | Olfactory receptor 1070                                                               | 0.00 | 2.6 | -1.3 | -3.3 | --- |
| 7_346 | gi_116004282 | NM_001077032 | CXorf65   | Chromosome x open reading frame 65                                                    | 0.01 | 2.2 | -1.5 | -3.3 | --- |
| 7_347 | gi_31343166  | NM_173964    | TEK       | Tek tyrosine kinase, endothelial                                                      | 0.00 | 2.3 | -1.4 | -3.3 | --- |
| 7_348 | gi_119908232 | XM_618596    | CDC42BPA  | Cdc42 binding protein kinase alpha (dmpk-like)                                        | 0.00 | 2.4 | -1.4 | -3.3 | --- |
| 7_349 | gi_115496687 | NM_001075698 | IFIT5     | Interferon-induced protein with tetratricopeptide repeats 5                           | 0.00 | 4.1 | 1.2  | -3.3 | --- |
| 7_350 | gi_66792745  | NM_001024493 | TRPV2     | Transient receptor potential cation channel, subfamily v, member 2                    | 0.01 | 2.2 | -1.5 | -3.3 | --- |
| 7_351 | gi_119910478 | XM_580597    | RINL      | Ras and rab interactor-like                                                           | 0.00 | 3.2 | 1.0  | -3.3 | --- |
| 7_352 | gi_119912581 | XR_027582    | PITPNC1   | Phosphatidylinositol transfer protein, cytoplasmic 1                                  | 0.00 | 2.3 | -1.4 | -3.3 | --- |
| 7_353 | gi_119922265 | XM_001254653 | LOC787179 | Similar to t cell receptor alpha chain                                                | 0.00 | 3.4 | 1.0  | -3.3 | --- |
| 7_354 | gi_78369353  | NM_001035367 | LOC527068 | Aldo-keto reductase family 1 member c3-like                                           | 0.01 | 2.2 | -1.5 | -3.3 | --- |
| 7_355 | gi_119913798 | XM_588916    | SNX33     | Sorting nexin 33                                                                      | 0.00 | 2.2 | -1.5 | -3.3 | --- |
| 7_356 | gi_84000234  | NM_001038135 | REEP6     | Receptor accessory protein 6                                                          | 0.00 | 3.3 | 1.0  | -3.3 | --- |
| 7_357 | gi_76625185  | XM_603327    | LOC524985 | Similar to olfactory receptor mor222-1                                                | 0.00 | 3.0 | -1.1 | -3.3 | --- |
| 7_358 | gi_119889147 | XM_585637    | LOC508806 | Similar to seven transmembrane helix receptor                                         | 0.00 | 2.5 | -1.3 | -3.3 | --- |
| 7_359 | gi_119916331 | XM_608193    | TNIP2     | Tnfaip3 interacting protein 2                                                         | 0.00 | 2.9 | -1.1 | -3.3 | --- |
| 7_360 | gi_114051342 | NM_001046143 | CDKN2AIP  | CDKN2A interacting protein)                                                           | 0.00 | 2.1 | -1.5 | -3.3 | --- |
| 7_361 | gi_124249271 | NM_001080906 | NUB1      | Negative regulator of ubiquitin-like proteins 1                                       | 0.00 | 5.7 | 1.7  | -3.3 | --- |
| 7_362 | gi_119926964 | XM_594793    | Olfir6    | Olfactory receptor 6                                                                  | 0.00 | 3.4 | 1.0  | -3.3 | --- |
| 7_363 | gi_110626110 | NM_001013593 | BCAT2     | Branched chain amino-acid transaminase 2, mitochondrial                               | 0.00 | 2.3 | -1.4 | -3.3 | --- |
| 7_364 | gi_119892555 | XM_001255364 | Olfir820  | Olfactory receptor 820                                                                | 0.00 | 2.7 | -1.2 | -3.2 | --- |
| 7_365 | gi_119908569 | XR_028737    | LOC789222 | Similar to zinc finger protein riz                                                    | 0.00 | 2.3 | -1.4 | -3.2 | --- |
| 7_366 | gi_119914504 | XM_001251656 | LOC783001 | Similar to chromosome 12 open reading frame 2                                         | 0.00 | 2.4 | -1.4 | -3.2 | --- |
| 7_367 | gi_119923954 | XM_595420    | Olfir1276 | Olfactory receptor 1276                                                               | 0.00 | 3.1 | -1.1 | -3.2 | --- |
| 7_368 | gi_119919022 | XM_001251836 | OR8A1     | Olfactory receptor, family 8, subfamily a, member 1                                   | 0.00 | 2.4 | -1.3 | -3.2 | --- |
| 7_369 | gi_119892575 | XM_001255503 | LOC788438 | Similar to olfactory receptor mor210-4                                                | 0.00 | 3.0 | -1.1 | -3.2 | --- |
| 7_370 | gi_156120584 | NM_001101968 | STYXL1    | Serine/threonine/tyrosine interacting-like 1                                          | 0.01 | 2.2 | -1.4 | -3.2 | --- |
| 7_371 | gi_119922882 | XM_600016    | LOC521749 | Similar to olfactory receptor mor245-4                                                | 0.00 | 3.5 | 1.1  | -3.2 | --- |
| 7_372 | gi_119913158 | XM_588962    | PARP8     | Poly (adp-ribose) polymerase family, member 8                                         | 0.00 | 3.2 | 1.0  | -3.2 | --- |
| 7_373 | gi_114050764 | NM_001046472 | GPR183    | G protein-coupled receptor 183                                                        | 0.01 | 2.2 | -1.4 | -3.2 | --- |

|       |              |              |           |                                                                                                   |      |     |      |      |     |
|-------|--------------|--------------|-----------|---------------------------------------------------------------------------------------------------|------|-----|------|------|-----|
| 7_374 | gi_77736288  | NM_001034672 | TSPAN33   | Tetraspanin 33                                                                                    | 0.00 | 4.4 | 1.4  | -3.2 | --- |
| 7_375 | gi_27807288  | NM_174716    | ANXA2     | Annexin a2                                                                                        | 0.00 | 3.2 | 1.0  | -3.2 | --- |
| 7_376 | gi_119921731 | XM_001255638 | LOC788640 | Similar to olfactory receptor olr87                                                               | 0.00 | 3.3 | 1.0  | -3.2 | --- |
| 7_377 | gi_119921037 | XM_604679    | OlfR622   | Olfactory receptor 622                                                                            | 0.00 | 2.5 | -1.3 | -3.2 | --- |
| 7_378 | gi_119902174 | XM_605040    | LOC526667 | Similar to olfactory receptor mor106-5                                                            | 0.01 | 2.3 | -1.4 | -3.2 | --- |
| 7_379 | gi_119902413 | XM_617674    | MDGA2     | Mam domain containing glycosylphosphatidylinositol anchor2                                        | 0.00 | 2.9 | -1.1 | -3.2 | --- |
| 7_380 | gi_119895360 | XM_586131    | LOC509217 | Similar to seven transmembrane helix receptor                                                     | 0.00 | 2.7 | -1.2 | -3.2 | --- |
| 7_381 | gi_119893497 | XM_607704    | NDST4     | N-deacetylase/n-sulfotransferase (heparan glucosaminyl) 4                                         | 0.00 | 2.7 | -1.2 | -3.2 | --- |
| 7_382 | gi_156121044 | NM_001102199 | MYO1B     | Myosin ib                                                                                         | 0.00 | 2.4 | -1.3 | -3.2 | --- |
| 7_383 | gi_134085656 | NM_001083422 | STK17A    | Serine/threonine kinase 17a                                                                       | 0.00 | 2.3 | -1.4 | -3.2 | --- |
| 7_384 | gi_119915895 | XM_001250447 | LOC782393 | Similar to eukaryotic translation elongation factor 1 epsilon 1                                   | 0.00 | 2.1 | -1.5 | -3.2 | --- |
| 7_385 | gi_119888596 | XR_028504    | SP110     | Sp110 nuclear body protein                                                                        | 0.00 | 2.3 | -1.4 | -3.2 | --- |
| 7_386 | gi_119901002 | XM_589483    | C5        | Complement component 5                                                                            | 0.00 | 2.4 | -1.3 | -3.2 | --- |
| 7_387 | gi_119886996 | XM_001249828 | LCA5L     | Leber congenital amaurosis 5-like                                                                 | 0.00 | 2.6 | -1.2 | -3.1 | --- |
| 7_388 | gi_119892507 | XM_001254890 | OlfR770   | Olfactory receptor 770                                                                            | 0.00 | 2.9 | -1.1 | -3.1 | --- |
| 7_389 | gi_119924514 | XM_001253602 | OlfR1293  | Olfactory receptor 1293                                                                           | 0.00 | 3.0 | -1.1 | -3.1 | --- |
| 7_390 | gi_134085676 | NM_001083530 | S100A3    | S100 calcium binding protein a3                                                                   | 0.00 | 4.0 | 1.3  | -3.1 | --- |
| 7_391 | gi_119926165 | XM_001255258 | LOC788100 | Similar to seven transmembrane helix receptor                                                     | 0.01 | 2.2 | -1.4 | -3.1 | --- |
| 7_392 | gi_157279990 | NM_001105041 | RUSC1     | Run and sh3 domain containing 1                                                                   | 0.00 | 4.2 | 1.3  | -3.1 | --- |
| 7_393 | gi_116734828 | NM_001075320 | TIMD4     | T-cell immunoglobulin and mucin domain containing 4                                               | 0.00 | 2.5 | -1.2 | -3.1 | --- |
| 7_394 | gi_31341720  | NM_174541    | GABRA2    | Gamma-aminobutyric acid (gaba) a receptor, alpha 2                                                | 0.00 | 2.5 | -1.3 | -3.1 | --- |
| 7_395 | gi_119892357 | XM_592833    | DYRK2     | Dual-specificity tyrosine-(y)-phosphorylation regulated kinase 2                                  | 0.01 | 2.2 | -1.4 | -3.1 | --- |
| 7_396 | gi_119926000 | XM_001250683 | CA1       | Carbonic anhydrase i                                                                              | 0.00 | 2.9 | -1.1 | -3.1 | --- |
| 7_397 | gi_119923232 | XM_612459    | LOC533149 | Hypothetical protein                                                                              | 0.00 | 2.3 | -1.4 | -3.1 | --- |
| 7_398 | gi_119910251 | XM_001250104 | FTSJD1    | Ftsj methyltransferase domain containing 1                                                        | 0.00 | 5.1 | 1.6  | -3.1 | --- |
| 7_399 | gi_119920696 | XM_608251    | CRLF2     | Cytokine receptor-like factor 2                                                                   | 0.00 | 4.0 | 1.3  | -3.1 | --- |
| 7_400 | gi_119907426 | XM_001255664 | OR52A1    | Olfactory receptor, family 52, subfamily a, member 1                                              | 0.00 | 3.4 | 1.1  | -3.1 | --- |
| 7_401 | gi_119902080 | XM_588656    | BvD1.18   | T cell receptor delta chain variable region                                                       | 0.00 | 2.6 | -1.2 | -3.1 | --- |
| 7_402 | gi_119888478 | XM_587645    | CPS1      | Carbamoyl-phosphate synthase 1, mitochondrial                                                     | 0.02 | 2.0 | -1.5 | -3.1 | --- |
| 7_403 | gi_119884953 | XM_591264    | PLCH1     | Phospholipase c, eta 1                                                                            | 0.00 | 5.0 | 1.6  | -3.1 | --- |
| 7_404 | gi_119924516 | XM_001253624 | LOC785683 | Similar to olfactory receptor olr758                                                              | 0.00 | 2.5 | -1.2 | -3.1 | --- |
| 7_405 | gi_119889928 | XM_609742    | COL24A1   | Collagen, type xxiv, alpha 1                                                                      | 0.00 | 3.1 | 1.0  | -3.1 | --- |
| 7_406 | gi_115497951 | NM_001075871 | IER2      | Immediate early response 2                                                                        | 0.00 | 4.0 | 1.3  | -3.1 | --- |
| 7_407 | gi_119915866 | XM_607555    | HIVEP1    | Human immunodeficiency virus type i enhancer binding protein 1                                    | 0.00 | 3.8 | 1.2  | -3.1 | --- |
| 7_408 | gi_119911171 | XM_609549    | ZNF584    | Similar to zinc finger protein 420                                                                | 0.01 | 2.1 | -1.5 | -3.1 | --- |
| 7_409 | gi_119920543 | XM_868002    | MAP7D2    | Map7 domain containing 2                                                                          | 0.00 | 3.1 | 1.0  | -3.1 | --- |
| 7_410 | gi_119893022 | XM_587046    | Clec2e    | C-type lectin domain family 2, member e                                                           | 0.00 | 2.5 | -1.2 | -3.1 | --- |
| 7_411 | gi_119921415 | XM_001249872 | LOC781446 | Similar to olfactory receptor olr1108                                                             | 0.00 | 2.9 | -1.0 | -3.0 | --- |
| 7_412 | gi_119901510 | XM_001253691 | TAAR1     | Trace amine associated receptor 1                                                                 | 0.00 | 3.0 | 1.0  | -3.0 | --- |
| 7_413 | gi_119891945 | XM_001249702 | MGAT4C    | Mannosyl (alpha-1,3-)-glycoprotein beta-1,4-n-acetylglucosaminyltransferase, isozyme c (putative) | 0.00 | 3.1 | 1.0  | -3.0 | --- |
| 7_414 | gi_119923045 | XM_001253400 | LOC785338 | Hypothetical protein                                                                              | 0.00 | 2.4 | -1.2 | -3.0 | --- |
| 7_415 | gi_119938379 | XM_001257069 | LOC790653 | Similar to ml5                                                                                    | 0.01 | 2.3 | -1.3 | -3.0 | --- |
| 7_416 | gi_156120930 | NM_001102142 | SP7       | Sp7 transcription factor                                                                          | 0.00 | 2.5 | -1.2 | -3.0 | --- |
| 7_417 | gi_164448597 | NM_001035271 | KLF6      | Kruppel-like factor 6                                                                             | 0.00 | 2.1 | -1.4 | -3.0 | --- |
| 7_418 | gi_119901506 | XM_001253621 | Taar3     | Trace amine-associated receptor 3                                                                 | 0.00 | 2.4 | -1.2 | -3.0 | --- |
| 7_419 | gi_119895362 | XM_868904    | OR2M4     | Olfactory receptor, family 2, subfamily m, member 4                                               | 0.00 | 2.8 | -1.1 | -3.0 | --- |
| 7_420 | gi_119929817 | XM_593643    | OlfR1086  | Olfactory receptor 1086                                                                           | 0.00 | 2.5 | -1.2 | -3.0 | --- |
| 7_421 | gi_119889478 | XM_608618    | OlfR1402  | Olfactory receptor 1402                                                                           | 0.00 | 2.8 | -1.1 | -3.0 | --- |
| 7_422 | gi_119915614 | XM_001253184 | LOC785040 | Similar to seven transmembrane helix receptor                                                     | 0.00 | 2.9 | -1.1 | -3.0 | --- |
| 7_423 | gi_119894688 | XM_001249956 | ZSWIM4    | Similar to fj00044 protein                                                                        | 0.00 | 2.5 | -1.2 | -3.0 | --- |
| 7_424 | gi_119877213 | XM_614756    | ROBO2     | Roundabout, axon guidance receptor, homolog 2 (drosophila)                                        | 0.01 | 2.2 | -1.4 | -3.0 | --- |
| 7_425 | gi_119916408 | XM_616601    | WDR7      | Similar to rabconnectin-3 beta                                                                    | 0.00 | 2.2 | -1.4 | -3.0 | --- |
| 7_426 | gi_119906499 | XM_588521    | VCP1P1    | Similar to kiaa1850 protein, transcript variant 1                                                 | 0.01 | 2.0 | -1.5 | -3.0 | --- |
| 7_427 | gi_119922419 | XM_001254973 | OlfR1132  | Olfactory receptor 1132                                                                           | 0.00 | 2.8 | -1.1 | -3.0 | --- |
| 7_428 | gi_119930323 | XM_001253262 | LOC785149 | Similar to olfactory receptor olr1414                                                             | 0.01 | 2.2 | -1.4 | -3.0 | --- |
| 7_429 | gi_119923950 | XM_001250244 | LOC781758 | Similar to olfactory receptor olr753                                                              | 0.02 | 2.2 | -1.4 | -3.0 | --- |
| 7_430 | gi_119889472 | XM_001255499 | LOC788724 | Similar to hist2h2aa1 protein                                                                     | 0.00 | 2.5 | -1.2 | -3.0 | --- |
| 7_431 | gi_76662928  | XM_588102    | OR2M3     | Olfactory receptor, family 2, subfamily m, member 3                                               | 0.00 | 2.9 | 1.0  | -3.0 | --- |
| 7_432 | gi_119902300 | XM_001254661 | OlfR1276  | Olfactory receptor 1276                                                                           | 0.00 | 3.0 | 1.0  | -3.0 | --- |
| 7_433 | gi_119924838 | XM_001253851 | LOC786035 | Similar to seven transmembrane helix receptor                                                     | 0.00 | 2.7 | -1.1 | -3.0 | --- |
| 7_434 | gi_119895332 | XM_001255076 | OR2T8     | Olfactory receptor, family 2, subfamily t, member 8                                               | 0.00 | 2.8 | -1.1 | -3.0 | --- |
| 7_435 | gi_116003900 | NM_001076841 | H2-T24    | Histocompatibility 2, t region locus 24                                                           | 0.00 | 3.1 | 1.0  | -3.0 | --- |
| 7_436 | gi_77735876  | NM_001034463 | C21orf33  | Chromosome 21 open reading frame 33                                                               | 0.00 | 2.6 | -1.1 | -3.0 | --- |
| 7_437 | gi_119921644 | XM_001254228 | LOC786593 | Similar to t-cell receptor alpha chain                                                            | 0.00 | 3.0 | 1.0  | -3.0 | --- |
| 7_438 | gi_119894394 | XM_585315    | BOD1L     | Biorientation of chromosomes in cell division 1-like                                              | 0.00 | 2.1 | -1.4 | -3.0 | --- |
| 7_439 | gi_119915680 | XM_001253103 | LOC786846 | Similar to olfactory receptor 9, rat orthologue of mouse mor156-2a, transcript variant 1          | 0.01 | 2.2 | -1.3 | -3.0 | --- |
| 7_440 | gi_119907926 | XM_869607    | OR8H3     | Olfactory receptor, family 8, subfamily h, member 3                                               | 0.00 | 2.6 | -1.1 | -3.0 | --- |
| 7_441 | gi_119922650 | XM_601354    | OlfR1239  | Olfactory receptor 1239                                                                           | 0.01 | 2.3 | -1.3 | -3.0 | --- |
| 7_442 | gi_119895350 | XM_001255203 | LOC788011 | Similar to olfactory receptor olr1566                                                             | 0.00 | 2.4 | -1.2 | -3.0 | --- |
| 7_443 | gi_119923779 | XM_001250462 | LOC783543 | Similar to l antigen family, member 3, transcript variant 2                                       | 0.00 | 2.4 | -1.2 | -3.0 | --- |
| 7_444 | gi_119879601 | XM_612607    | KALRN     | Kalirin, rhogef kinase                                                                            | 0.01 | 2.2 | -1.4 | -3.0 | --- |
| 7_445 | gi_31341372  | NM_176674    | COX7A1    | Cytochrome c oxidase subunit viia polypeptide 1 (muscle)                                          | 0.01 | 2.0 | -1.4 | -2.9 | --- |
| 7_446 | gi_117935050 | NM_178109    | EIF2AK2   | Eukaryotic translation initiation factor 2-alpha kinase 2                                         | 0.00 | 2.9 | 1.0  | -2.9 | --- |
| 7_447 | gi_119921043 | XM_001252468 | OR52A5    | Olfactory receptor, family 52, subfamily a, member 5                                              | 0.00 | 2.8 | -1.0 | -2.9 | --- |
| 7_448 | gi_139949155 | NM_001083740 | GPT       | Glutamic-pyruvate transaminase (alanine aminotransferase)                                         | 0.00 | 2.4 | -1.2 | -2.9 | --- |
| 7_449 | gi_119929446 | XM_001256647 | LOC790072 | Hypothetical protein                                                                              | 0.00 | 3.4 | 1.2  | -2.9 | --- |
| 7_450 | gi_148226500 | NM_001098047 | GPR21     | G protein-coupled receptor 21                                                                     | 0.01 | 2.4 | -1.2 | -2.9 | --- |
| 7_451 | gi_119925030 | XM_001251274 | LOC786338 | Hypothetical protein                                                                              | 0.00 | 2.9 | 1.0  | -2.9 | --- |
| 7_452 | gi_77736166  | NM_001034610 | RIPK2     | Receptor-interacting serine-threonine kinase 2                                                    | 0.00 | 2.6 | -1.1 | -2.9 | --- |
| 7_453 | gi_119924682 | XM_581926    | LOC538674 | Similar to protocadherin                                                                          | 0.01 | 2.2 | -1.3 | -2.9 | --- |
| 7_454 | gi_119892509 | XM_001254905 | OlfR794   | Olfactory receptor 794                                                                            | 0.01 | 2.2 | -1.3 | -2.9 | --- |
| 7_455 | gi_119895309 | XM_601243    | OR2C3     | Olfactory receptor, family 2, subfamily c, member 3                                               | 0.00 | 2.7 | -1.1 | -2.9 | --- |
| 7_456 | gi_119892559 | XM_001255392 | OR6C6     | Olfactory receptor, family 6, subfamily c, member 6                                               | 0.00 | 2.7 | -1.1 | -2.9 | --- |
| 7_457 | gi_119924200 | XM_614803    | GLRA3     | Glycine receptor, alpha 3                                                                         | 0.00 | 2.7 | -1.0 | -2.9 | --- |
| 7_458 | gi_76662918  | XM_868812    | OR2L2     | Olfactory receptor, family 2, subfamily l, member 2                                               | 0.01 | 2.3 | -1.3 | -2.9 | --- |
| 7_459 | gi_50872142  | NM_001002890 | KLRD1     | Killer cell lectin-like receptor subfamily d, member 1                                            | 0.01 | 2.2 | -1.3 | -2.9 | --- |
| 7_460 | gi_119925323 | XM_001255584 | OlfR905   | Olfactory receptor 905                                                                            | 0.00 | 2.5 | -1.2 | -2.9 | --- |

|       |              |              |           |                                                                                                           |      |     |      |      |     |
|-------|--------------|--------------|-----------|-----------------------------------------------------------------------------------------------------------|------|-----|------|------|-----|
| 7_461 | gi_119927767 | XM_868179    | OR5M3     | Olfactory receptor, family 5, subfamily m, member 3                                                       | 0.00 | 2.6 | -1.1 | -2.9 | --- |
| 7_462 | gi_139947537 | NM_001083736 | JAM2      | Junctonal adhesion molecule 2                                                                             | 0.00 | 4.4 | 1.5  | -2.9 | --- |
| 7_463 | gi_116004236 | NM_001077009 | P2RY14    | Purinergic receptor p2y, g-protein coupled, 14                                                            | 0.00 | 2.7 | -1.1 | -2.9 | --- |
| 7_464 | gi_119915421 | XM_584616    | LOC507917 | MHC class I heavy chain                                                                                   | 0.00 | 2.6 | -1.1 | -2.9 | --- |
| 7_465 | gi_76677494  | XM_587133    | OR6C4     | Olfactory receptor, family 6, subfamily c, member 4                                                       | 0.01 | 2.2 | -1.3 | -2.9 | --- |
| 7_466 | gi_119894667 | XM_001256348 | LOC789667 | Similar to olf4                                                                                           | 0.00 | 3.1 | 1.1  | -2.9 | --- |
| 7_467 | gi_157427975 | NM_001105426 | RNASE13   | Ribonuclease, rnase a family, 13 (non-active)                                                             | 0.00 | 3.5 | 1.2  | -2.9 | --- |
| 7_468 | gi_76635921  | XM_596754    | OlfR561   | Olfactory receptor 561                                                                                    | 0.01 | 2.3 | -1.3 | -2.9 | --- |
| 7_469 | gi_119906418 | XM_001250149 | LOC782051 | Similar to alpha 2 actin                                                                                  | 0.00 | 2.7 | -1.0 | -2.9 | --- |
| 7_470 | gi_119892569 | XM_001255472 | LOC788396 | Similar to olfactory receptor mor265-1                                                                    | 0.00 | 3.1 | 1.1  | -2.8 | --- |
| 7_471 | gi_119922015 | XM_001253993 | OR8J1     | Olfactory receptor, family 8, subfamily j, member 1                                                       | 0.01 | 2.5 | -1.2 | -2.8 | --- |
| 7_472 | gi_31341996  | NM_174439    | TMPRSS15  | Transmembrane protease, serine 15                                                                         | 0.01 | 2.3 | -1.2 | -2.8 | --- |
| 7_473 | gi_118151099 | NM_001078004 | PEL1      | Pellino homolog 1 (drosophila)                                                                            | 0.00 | 3.8 | 1.3  | -2.8 | --- |
| 7_474 | gi_119920980 | XM_001250243 | OR51F2    | Olfactory receptor, family 51, subfamily f, member 2                                                      | 0.00 | 2.4 | -1.2 | -2.8 | --- |
| 7_475 | gi_119921914 | XM_001250926 | LOC782296 | Similar to olfactory receptor mor114-3                                                                    | 0.00 | 2.7 | -1.0 | -2.8 | --- |
| 7_476 | gi_149642782 | NM_001098895 | SLC25A30  | Solute carrier family 25, member 30                                                                       | 0.00 | 2.2 | -1.3 | -2.8 | --- |
| 7_477 | gi_119902302 | XM_001254703 | OlfR1276  | Olfactory receptor 1276                                                                                   | 0.01 | 2.2 | -1.3 | -2.8 | --- |
| 7_478 | gi_119903309 | XM_605410    | SRD5A2    | Steroid-5-alpha-reductase, alpha polypeptide 2 (3-oxo-5-alpha-steroid delta 4-dehydrogenase alpha 2)      | 0.01 | 2.1 | -1.3 | -2.8 | --- |
| 7_479 | gi_76684604  | XM_870419    | Olr468    | Olfactory receptor 468                                                                                    | 0.01 | 2.3 | -1.2 | -2.8 | --- |
| 7_480 | gi_119907381 | XM_593669    | OR52H1    | Olfactory receptor, family 52, subfamily h, member 1                                                      | 0.01 | 2.3 | -1.2 | -2.8 | --- |
| 7_481 | gi_119911558 | XM_588697    | TNFAIP1   | Tumor necrosis factor, alpha-induced protein 1 (endothelial)                                              | 0.00 | 2.7 | -1.0 | -2.8 | --- |
| 7_482 | gi_119892515 | XM_584195    | LOC507560 | Similar to olfactory receptor olr920                                                                      | 0.01 | 2.4 | -1.2 | -2.8 | --- |
| 7_483 | gi_119926167 | XM_001255280 | LOC788129 | Similar to seven transmembrane helix receptor                                                             | 0.01 | 2.3 | -1.2 | -2.8 | --- |
| 7_484 | gi_27805856  | NM_174285    | CREB1     | Camp responsive element binding protein 1                                                                 | 0.00 | 2.1 | -1.3 | -2.8 | --- |
| 7_485 | gi_119887404 | XM_589101    | FSIP2     | Fibrous sheath interacting protein 2                                                                      | 0.00 | 2.4 | -1.2 | -2.8 | --- |
| 7_486 | gi_119893030 | XM_584745    | LOC508026 | Similar to pregnancy-zone protein                                                                         | 0.03 | 2.0 | -1.4 | -2.8 | --- |
| 7_487 | gi_119894646 | XM_590569    | LOC512956 | Similar to olfactory receptor                                                                             | 0.00 | 2.6 | -1.1 | -2.8 | --- |
| 7_488 | gi_119921997 | XM_001253442 | LOC785406 | Similar to olfactory receptor mor185-5                                                                    | 0.00 | 2.8 | 1.0  | -2.8 | --- |
| 7_489 | gi_119892531 | XM_001255188 | Olr1012   | Olfactory receptor 1012                                                                                   | 0.01 | 2.3 | -1.2 | -2.8 | --- |
| 7_490 | gi_119903385 | XM_599529    | Ttc39d    | Tetratricopeptide repeat domain 39d                                                                       | 0.00 | 2.5 | -1.1 | -2.8 | --- |
| 7_491 | gi_119922520 | XM_001252579 | LOC784191 | Similar to seven transmembrane helix receptor                                                             | 0.00 | 2.5 | -1.1 | -2.8 | --- |
| 7_492 | gi_149643056 | NM_001099198 | MGC165685 | Hypothetical protein                                                                                      | 0.01 | 2.2 | -1.3 | -2.8 | --- |
| 7_493 | gi_119892549 | XM_001255334 | LOC788199 | Similar to olfactory receptor mor113-4                                                                    | 0.01 | 2.2 | -1.2 | -2.8 | --- |
| 7_494 | gi_119922221 | XM_001254166 | OlfR1199  | Olfactory receptor 1199                                                                                   | 0.00 | 2.7 | 1.0  | -2.8 | --- |
| 7_495 | gi_119909126 | XM_001252899 | LOC784650 | Similar to guanylate cyclase 70 kda subunit                                                               | 0.01 | 2.3 | -1.2 | -2.8 | --- |
| 7_496 | gi_119925348 | XM_001250814 | LOC785762 | Similar to prostaglandin f synthase-like1 protein                                                         | 0.00 | 2.7 | 1.0  | -2.8 | --- |
| 7_497 | gi_119922591 | XM_001254813 | LOC787405 | Similar to t cell receptor delta chain                                                                    | 0.00 | 3.4 | 1.2  | -2.8 | --- |
| 7_498 | gi_119922293 | XM_610277    | Gm4911    | Predicted pseudogene 4911                                                                                 | 0.00 | 2.6 | -1.1 | -2.8 | --- |
| 7_499 | gi_116004418 | NM_001077100 | MGC137454 | Hypothetical protein                                                                                      | 0.00 | 2.5 | -1.1 | -2.7 | --- |
| 7_500 | gi_119921172 | XM_001255156 | LOC787947 | Similar to Cfof4                                                                                          | 0.01 | 2.3 | -1.2 | -2.7 | --- |
| 7_501 | gi_119924969 | XM_590908    | OR52N5    | Olfactory receptor, family 52, subfamily n, member 5                                                      | 0.00 | 2.5 | -1.1 | -2.7 | --- |
| 7_502 | gi_88319945  | NM_176638    | CASP4     | Caspase 4, apoptosis-related cysteine peptidase                                                           | 0.00 | 3.2 | 1.2  | -2.7 | --- |
| 7_503 | gi_119894615 | XM_868476    | OR10H3    | Olfactory receptor, family 10, subfamily h, member 3                                                      | 0.00 | 2.5 | -1.1 | -2.7 | --- |
| 7_504 | gi_163915356 | NM_001113173 | CXCL11    | Chemokine (c-x-c motif) ligand 11                                                                         | 0.01 | 2.4 | -1.1 | -2.7 | --- |
| 7_505 | gi_119907422 | XM_592902    | LOC514976 | Similar to olfactory receptor hpfh1or                                                                     | 0.02 | 2.1 | -1.3 | -2.7 | --- |
| 7_506 | gi_119893818 | XM_612659    | LOC533295 | Similar to y53f4b.4a                                                                                      | 0.01 | 2.4 | -1.1 | -2.7 | --- |
| 7_507 | gi_115497081 | NM_001075656 | JUNB      | Jun B proto-oncogene                                                                                      | 0.00 | 3.9 | 1.4  | -2.7 | --- |
| 7_508 | gi_116003880 | NM_001076831 | COL3A1    | Collagen, type iii, alpha 1                                                                               | 0.00 | 2.7 | 1.0  | -2.7 | --- |
| 7_509 | gi_119927416 | XM_001256048 | LOC789240 | Similar to testis derived transcript                                                                      | 0.01 | 2.2 | -1.2 | -2.7 | --- |
| 7_510 | gi_119902188 | XM_586246    | OR4M1     | Olfactory receptor, family 4, subfamily m, member 1                                                       | 0.02 | 2.1 | -1.3 | -2.7 | --- |
| 7_511 | gi_76686152  | XM_593724    | OR4C6     | Olfactory receptor, family 4, subfamily c, member 46                                                      | 0.00 | 2.3 | -1.2 | -2.7 | --- |
| 7_512 | gi_119920037 | XR_027774    | LOC784212 | Riken cDNA 1700014n06 gene                                                                                | 0.02 | 2.0 | -1.3 | -2.7 | --- |
| 7_513 | gi_76677166  | XM_598492    | OR6Y1     | Olfactory receptor, family 6, subfamily y, member 1                                                       | 0.00 | 2.4 | -1.1 | -2.7 | --- |
| 7_514 | gi_119902168 | XM_001252434 | OR11G2    | Olfactory receptor, family 11, subfamily g, member 2                                                      | 0.00 | 2.5 | -1.1 | -2.7 | --- |
| 7_515 | gi_31342172  | NM_174376    | KLRA1     | Killer cell lectin-like receptor subfamily a pseudogene 1                                                 | 0.00 | 3.2 | 1.2  | -2.7 | --- |
| 7_516 | gi_119901504 | XM_600290    | Taar4     | Trace amine-associated receptor 4                                                                         | 0.00 | 2.5 | -1.1 | -2.7 | --- |
| 7_517 | gi_41386789  | NM_174356    | IL12B     | Interleukin 12b (natural killer cell stimulatory factor 2, cytotoxic lymphocyte maturation factor 2, p40) | 0.00 | 2.3 | -1.2 | -2.7 | --- |
| 7_518 | gi_119884883 | XM_606901    | PRKCI     | Protein kinase c, iota                                                                                    | 0.00 | 2.6 | -1.0 | -2.7 | --- |
| 7_519 | gi_115497291 | NM_001075634 | TCIRG1    | T-cell, immune regulator 1, atpase, h+ transporting, lysosomal v0 subunit a3                              | 0.00 | 2.1 | -1.3 | -2.7 | --- |
| 7_520 | gi_31341616  | NM_174579    | POU1F1    | Pou class 1 homeobox 1                                                                                    | 0.01 | 2.2 | -1.2 | -2.7 | --- |
| 7_521 | gi_119925795 | XM_586018    | OR9G4     | Olfactory receptor, family 9, subfamily g, member 4                                                       | 0.01 | 2.4 | -1.1 | -2.7 | --- |
| 7_522 | gi_119928284 | XM_580340    | OR13C9    | Olfactory receptor, family 13, subfamily c, member 9                                                      | 0.00 | 2.6 | 1.0  | -2.7 | --- |
| 7_523 | gi_119915640 | XM_592285    | Olr1768   | Olfactory receptor 1768                                                                                   | 0.01 | 2.4 | -1.1 | -2.7 | --- |
| 7_524 | gi_119926136 | XM_599438    | PM20D2    | Peptidase m20 domain containing 2                                                                         | 0.00 | 4.2 | 1.6  | -2.7 | --- |
| 7_525 | gi_134085852 | NM_001083407 | SPATA20   | Spermatogenesis associated 20                                                                             | 0.00 | 2.4 | -1.1 | -2.7 | --- |
| 7_526 | gi_119901508 | XM_001253652 | TAAR2     | Trace amine associated receptor 2                                                                         | 0.00 | 2.4 | -1.1 | -2.7 | --- |
| 7_527 | gi_61808422  | XM_586491    | OR4C6     | Olfactory receptor, family 4, subfamily c, member 6                                                       | 0.01 | 2.2 | -1.2 | -2.7 | --- |
| 7_528 | gi_76680252  | XM_870182    | LOC521256 | Similar to olfactory receptor olfr566                                                                     | 0.01 | 2.2 | -1.2 | -2.7 | --- |
| 7_529 | gi_77404247  | NM_001034041 | SNCA      | Synuclein, alpha (non a4 component of amyloid precursor)                                                  | 0.00 | 2.5 | -1.1 | -2.7 | --- |
| 7_530 | gi_119903002 | XM_867514    | TTC8      | Tetratricopeptide repeat domain 8                                                                         | 0.00 | 2.3 | -1.2 | -2.7 | --- |
| 7_531 | gi_119909243 | XM_614458    | CLIP1     | Cap-gly domain containing linker protein 1                                                                | 0.00 | 2.2 | -1.2 | -2.6 | --- |
| 7_532 | gi_149643100 | NM_001098958 | CDKN1A    | Cyclin-dependent kinase inhibitor 1a (p21, cip1)                                                          | 0.00 | 2.2 | -1.2 | -2.6 | --- |
| 7_533 | gi_119924383 | XM_001254912 | OlfR1124  | Olfactory receptor 1124                                                                                   | 0.00 | 2.5 | -1.1 | -2.6 | --- |
| 7_534 | gi_119920952 | XM_870254    | LOC617921 | Similar to olfactory receptor mor14-2                                                                     | 0.01 | 2.2 | -1.2 | -2.6 | --- |
| 7_535 | gi_119907885 | XM_001251593 | LOC782933 | Similar to olfactory receptor olfr987                                                                     | 0.03 | 2.0 | -1.3 | -2.6 | --- |
| 7_536 | gi_31342685  | NM_174169    | RG57      | Regulator of g-protein signaling 7                                                                        | 0.01 | 2.3 | -1.2 | -2.6 | --- |
| 7_537 | gi_31342076  | NM_174411    | PAG1B     | Pregnancy-associated glycoprotein 1                                                                       | 0.02 | 2.1 | -1.3 | -2.6 | --- |
| 7_538 | gi_119902589 | XR_027721    | DMXL2     | Dmx-like 2                                                                                                | 0.00 | 2.4 | -1.1 | -2.6 | --- |
| 7_539 | gi_78050076  | NM_001035055 | CLDN11    | Claudin 11                                                                                                | 0.01 | 2.4 | -1.1 | -2.6 | --- |
| 7_540 | gi_158519826 | NM_001110096 | BEX4      | Brain expressed, x-linked 4                                                                               | 0.02 | 2.2 | -1.2 | -2.6 | --- |
| 7_541 | gi_119921691 | XM_001249303 | LOC781004 | Hypothetical protein                                                                                      | 0.00 | 2.5 | 1.0  | -2.6 | --- |
| 7_542 | gi_119921055 | XM_001252743 | Olr94     | Olfactory receptor 94                                                                                     | 0.01 | 2.3 | -1.2 | -2.6 | --- |
| 7_543 | gi_119889562 | XM_001250696 | LOC782107 | Similar to KIAA0466 protein                                                                               | 0.00 | 2.1 | -1.2 | -2.6 | --- |
| 7_544 | gi_119911429 | XR_027573    | LOC783256 | Similar to brca1-binding helicase-like protein bach1                                                      | 0.00 | 2.5 | -1.1 | -2.6 | --- |
| 7_545 | gi_119915977 | XM_588519    | NFATC1    | Nuclear factor of activated t-cells, cytoplasmic, calcineurin-dependent 1                                 | 0.00 | 2.5 | 1.0  | -2.6 | --- |
| 7_546 | gi_119922217 | XM_593873    | OlfR1257  | Olfactory receptor 1257                                                                                   | 0.00 | 2.5 | 1.0  | -2.6 | --- |

|       |              |              |           |                                                                 |      |     |      |      |     |
|-------|--------------|--------------|-----------|-----------------------------------------------------------------|------|-----|------|------|-----|
| 7_547 | gi_119923068 | XM_001253958 | LOC786202 | Similar to olfactory receptor                                   | 0.02 | 2.2 | -1.2 | -2.6 | --- |
| 7_548 | gi_115495730 | NM_001076164 | PPP1R3C   | Protein phosphatase 1, regulatory (inhibitor) subunit 3c        | 0.03 | 2.0 | -1.3 | -2.6 | --- |
| 7_549 | gi_164452934 | NM_001080297 | SWAP70    | Swap-70 protein (swap70)                                        | 0.00 | 2.1 | -1.2 | -2.6 | --- |
| 7_550 | gi_119929994 | XM_001256551 | OR13F1    | Olfactory receptor, family 13, subfamily f, member 1            | 0.00 | 2.6 | 1.0  | -2.6 | --- |
| 7_551 | gi_119905975 | XM_602010    | NCOA3     | Nuclear receptor coactivator 3                                  | 0.01 | 2.2 | -1.2 | -2.6 | --- |
| 7_552 | gi_116004376 | NM_001077079 | C1orf185  | Chromosome 1 open reading frame 185                             | 0.02 | 2.1 | -1.2 | -2.6 | --- |
| 7_553 | gi_27806988  | NM_174545    | GABRG2    | Gamma-aminobutyric acid (gaba) a receptor, gamma 2              | 0.00 | 2.4 | -1.1 | -2.6 | --- |
| 7_554 | gi_119887145 | XR_028592    | SIK1      | Salt-inducible kinase 1                                         | 0.00 | 2.1 | -1.2 | -2.6 | --- |
| 7_555 | gi_157428069 | NM_001105473 | STOM      | Stomatin                                                        | 0.00 | 4.0 | 1.6  | -2.6 | --- |
| 7_556 | gi_116004410 | NM_001077096 | TNFRSF19  | Tumor necrosis factor receptor superfamily, member 19           | 0.00 | 2.2 | -1.1 | -2.6 | --- |
| 7_557 | gi_119902141 | XM_001252038 | RNASE11   | Ribonuclease, rnase a family, 11 (non-active)                   | 0.02 | 2.1 | -1.2 | -2.5 | --- |
| 7_558 | gi_119922207 | XM_001253994 | LOC786248 | Similar to c4bp alpha chain                                     | 0.03 | 2.0 | -1.3 | -2.5 | --- |
| 7_559 | gi_28603729  | NM_176626    | PAG18     | Pregnancy-associated glycoprotein 18                            | 0.00 | 2.4 | -1.0 | -2.5 | --- |
| 7_560 | gi_119912262 | XM_001254120 | KRTAP4-6  | Keratin associated protein 4-6                                  | 0.02 | 2.1 | -1.2 | -2.5 | --- |
| 7_561 | gi_115497393 | NM_001076097 | SULT1C4   | Sulfotransferase family, cytosolic, 1c, member 4                | 0.03 | 2.0 | -1.3 | -2.5 | --- |
| 7_562 | gi_94966908  | NM_001040554 | HLA-A     | Major histocompatibility complex, class i, a                    | 0.00 | 4.0 | 1.6  | -2.5 | --- |
| 7_563 | gi_119929795 | XM_581848    | OR8A1     | Olfactory receptor, family 8, subfamily a, member 1             | 0.01 | 2.2 | -1.2 | -2.5 | --- |
| 7_564 | gi_119928966 | XM_001253584 | LOC785624 | Similar to olf4                                                 | 0.01 | 2.2 | -1.1 | -2.5 | --- |
| 7_565 | gi_119922291 | XM_001251181 | MAGEB17   | Melanoma antigen family b, 17                                   | 0.02 | 2.0 | -1.2 | -2.5 | --- |
| 7_566 | gi_119907553 | XM_870343    | OlfR561   | Olfactory receptor 561                                          | 0.01 | 2.2 | -1.1 | -2.5 | --- |
| 7_567 | gi_119901893 | XM_001251257 | DENND4A   | Denn/madd domain containing 4a                                  | 0.00 | 2.1 | -1.2 | -2.5 | --- |
| 7_568 | gi_119922801 | XM_589238    | OlfR594   | Olfactory receptor 594                                          | 0.01 | 2.3 | -1.1 | -2.5 | --- |
| 7_569 | gi_119924375 | XM_001254801 | OR5F1     | Olfactory receptor, family 5, subfamily f, member 1             | 0.01 | 2.3 | -1.1 | -2.5 | --- |
| 7_570 | gi_76651124  | XM_870382    | OlfR124   | Olfactory receptor 124                                          | 0.01 | 2.2 | -1.2 | -2.5 | --- |
| 7_571 | gi_119927729 | XM_001254998 | OlfR143   | Olfactory receptor 143                                          | 0.01 | 2.2 | -1.1 | -2.5 | --- |
| 7_572 | gi_134085628 | NM_001083391 | ELMO2     | Engulfment and cell motility 2                                  | 0.00 | 2.3 | -1.1 | -2.5 | --- |
| 7_573 | gi_115496269 | NM_001075993 | ODF2L     | Outer dense fiber of sperm tails 2-like                         | 0.02 | 2.0 | -1.2 | -2.5 | --- |
| 7_574 | gi_119903020 | XM_001251107 | B2M       | Beta-2-microglobulin                                            | 0.00 | 2.2 | -1.2 | -2.5 | --- |
| 7_575 | gi_119888344 | XM_001252286 | LOC784637 | Similar to bicaudal d homolog 1 (drosophila)                    | 0.02 | 2.0 | -1.2 | -2.5 | --- |
| 7_576 | gi_119891769 | XM_001249423 | INSIG1    | Insulin induced gene 1                                          | 0.00 | 2.4 | 1.0  | -2.5 | --- |
| 7_577 | gi_119915423 | XR_028666    | LOC788634 | Similar to non-classical mhc class i antigen                    | 0.01 | 2.1 | -1.2 | -2.5 | --- |
| 7_578 | gi_119889249 | XM_581374    | ADAR      | Adenosine deaminase, RNA-specific                               | 0.00 | 4.0 | 1.6  | -2.5 | --- |
| 7_579 | gi_119892609 | XM_867045    | OR6C4     | Olfactory receptor, family 6, subfamily c, member 4             | 0.01 | 2.2 | -1.1 | -2.5 | --- |
| 7_580 | gi_76616267  | XM_870706    | TRIM69    | Tripartite motif containing 69                                  | 0.01 | 2.2 | -1.1 | -2.5 | --- |
| 7_581 | gi_118151015 | NM_001077961 | NDST3     | N-deacetylase/n-sulfotransferase (heparan glucosaminyl) 3       | 0.00 | 2.3 | -1.1 | -2.4 | --- |
| 7_582 | gi_119915551 | XM_871334    | OlfR1535  | Olfactory receptor 1535                                         | 0.01 | 2.2 | -1.1 | -2.4 | --- |
| 7_583 | gi_154152200 | NM_001100309 | TDRD7     | Tudor domain containing 7                                       | 0.00 | 4.4 | 1.8  | -2.4 | --- |
| 7_584 | gi_119921007 | XM_001251527 | LOC782875 | Similar to olfactory receptor olr88                             | 0.01 | 2.2 | -1.1 | -2.4 | --- |
| 7_585 | gi_119933559 | XM_001256916 | LOC790451 | Hypothetical protein                                            | 0.00 | 2.4 | 1.0  | -2.4 | --- |
| 7_586 | gi_119894398 | XM_001253396 | OR5W2     | Olfactory receptor, family 5, subfamily w, member 2             | 0.01 | 2.4 | 1.0  | -2.4 | --- |
| 7_587 | gi_149643024 | NM_001099037 | ABCD2     | ATP-binding cassette, sub-family d (ald), member 2              | 0.02 | 2.1 | -1.2 | -2.4 | --- |
| 7_588 | gi_119895358 | XM_582424    | OR2L13    | Olfactory receptor, family 2, subfamily l, member 13            | 0.01 | 2.2 | -1.1 | -2.4 | --- |
| 7_589 | gi_119912322 | XM_618105    | KRT39     | Keratin 39                                                      | 0.01 | 2.3 | -1.0 | -2.4 | --- |
| 7_590 | gi_119922011 | XM_001253957 | OR8K1     | Olfactory receptor, family 8, subfamily k, member 1             | 0.02 | 2.1 | -1.2 | -2.4 | --- |
| 7_591 | gi_76253719  | NM_001002892 | ST3GAL2   | ST3 beta-galactoside alpha-2,3-sialyltransferase 2              | 0.00 | 2.4 | 1.0  | -2.4 | --- |
| 7_592 | gi_149642586 | NM_001098900 | SLC44A3   | Solute carrier family 44, member 3                              | 0.01 | 2.2 | -1.1 | -2.4 | --- |
| 7_593 | gi_157074077 | NM_001103280 | TRDN      | Triadin                                                         | 0.01 | 2.2 | -1.1 | -2.4 | --- |
| 7_594 | gi_119921413 | XM_583529    | LOC506992 | Similar to olfactory receptor mor160-5                          | 0.01 | 2.3 | -1.0 | -2.4 | --- |
| 7_595 | gi_119908975 | XM_594035    | SETD7     | Set domain containing (lysine methyltransferase) 7              | 0.00 | 2.1 | -1.1 | -2.4 | --- |
| 7_596 | gi_56119115  | NM_001007819 | DDX4      | Dead (asp-glu-ala-asp) box polypeptide 4                        | 0.00 | 2.4 | 1.0  | -2.4 | --- |
| 7_597 | gi_115495458 | NM_001075504 | NLGN3     | Neuroigin 3                                                     | 0.01 | 2.1 | -1.1 | -2.4 | --- |
| 7_598 | gi_155372024 | NM_001101150 | NOVA1     | Neuro-oncological ventral antigen 1                             | 0.01 | 2.1 | -1.1 | -2.4 | --- |
| 7_599 | gi_119895374 | XM_001255418 | LOC788323 | Similar to olfactory receptor 2t29                              | 0.00 | 2.4 | 1.0  | -2.4 | --- |
| 7_600 | gi_119902186 | XM_869270    | LOC617084 | Similar to seven transmembrane helix receptor                   | 0.01 | 2.3 | 1.0  | -2.4 | --- |
| 7_601 | gi_119930158 | XM_869637    | OlfR284   | Olfactory receptor 284                                          | 0.01 | 2.3 | 1.0  | -2.4 | --- |
| 7_602 | gi_84000380  | NM_001038200 | PRP8      | Prolactin-related protein viii (PRP8)                           | 0.01 | 2.2 | -1.1 | -2.4 | --- |
| 7_603 | gi_31341292  | NM_176643    | DDHD1     | Ddhd domain containing 1                                        | 0.00 | 2.2 | -1.1 | -2.4 | --- |
| 7_604 | gi_119921234 | XM_597790    | RAPGEF5   | Rap guanine nucleotide exchange factor (GEF) 5                  | 0.02 | 2.0 | -1.2 | -2.4 | --- |
| 7_605 | gi_119892869 | XM_871851    | CAPRN2    | Caprin family member 2                                          | 0.00 | 2.3 | -1.0 | -2.4 | --- |
| 7_606 | gi_115496829 | NM_001075309 | GPM6A     | Glycoprotein m6a                                                | 0.01 | 2.3 | 1.0  | -2.3 | --- |
| 7_607 | gi_119895074 | XM_001255309 | LOC789216 | Similar to interferon regulatory factor 1                       | 0.00 | 4.5 | 1.9  | -2.3 | --- |
| 7_608 | gi_149642938 | NM_001098988 | NEK6      | Nima (never in mitosis gene a)-related kinase 6                 | 0.00 | 3.5 | 1.5  | -2.3 | --- |
| 7_609 | gi_119893961 | XM_598333    | RASSF6    | Ras association (ralgds/af-6) domain family member 6            | 0.02 | 2.1 | -1.1 | -2.3 | --- |
| 7_610 | gi_31341715  | NM_174543    | GABRA4    | Gamma-aminobutyric acid (gaba) a receptor, alpha 4              | 0.01 | 2.3 | 1.0  | -2.3 | --- |
| 7_611 | gi_119923620 | XM_609508    | LOC531024 | Similar to olfactory receptor olfr1197                          | 0.01 | 2.3 | 1.0  | -2.3 | --- |
| 7_612 | gi_62751672  | NM_001015586 | DSTN      | Destrin (actin depolymerizing factor)                           | 0.01 | 2.2 | -1.1 | -2.3 | --- |
| 7_613 | gi_147900717 | NM_001098141 | GYP A     | Glycophorin a                                                   | 0.01 | 2.2 | -1.0 | -2.3 | --- |
| 7_614 | gi_119912260 | XM_001254106 | LOC787090 | Similar to hair keratin cysteine rich protein                   | 0.02 | 2.1 | -1.1 | -2.3 | --- |
| 7_615 | gi_119875947 | XM_615721    | NCAM2     | Neural cell adhesion molecule 2                                 | 0.02 | 2.1 | -1.1 | -2.3 | --- |
| 7_616 | gi_119879088 | XM_001252292 | OR5H1     | Olfactory receptor, family 5, subfamily h, member 1             | 0.01 | 2.1 | -1.1 | -2.3 | --- |
| 7_617 | gi_119924185 | XM_001255673 | OR4D1     | Olfactory receptor, family 4, subfamily d, member 1             | 0.01 | 2.1 | -1.1 | -2.3 | --- |
| 7_618 | gi_119892551 | XM_001255346 | OR6C74    | Olfactory receptor, family 6, subfamily c, member 74            | 0.01 | 2.2 | -1.0 | -2.3 | --- |
| 7_619 | gi_119890804 | XM_001252604 | SNX13     | Sorting nexin 13                                                | 0.01 | 2.1 | -1.1 | -2.3 | --- |
| 7_620 | gi_119892287 | XM_001252824 | LOC785803 | Similar to lysozyme                                             | 0.01 | 2.3 | 1.0  | -2.3 | --- |
| 7_621 | gi_119878574 | XM_595936    | CADM2     | Cell adhesion molecule 2                                        | 0.01 | 2.1 | -1.1 | -2.3 | --- |
| 7_622 | gi_119921417 | XM_586484    | OlfR282   | Olfactory receptor 282                                          | 0.01 | 2.1 | -1.1 | -2.3 | --- |
| 7_623 | gi_157279882 | NM_001104987 | MCTP1     | Multiple c2 domains, transmembrane 1                            | 0.01 | 2.2 | -1.0 | -2.3 | --- |
| 7_624 | gi_76623803  | XM_586022    | LOC509128 | Similar to olfactory receptor, family 11, subfamily h, member 1 | 0.01 | 2.2 | 1.0  | -2.3 | --- |
| 7_625 | gi_119928697 | XM_593499    | OR4K15    | Olfactory receptor, family 4, subfamily k, member 15            | 0.01 | 2.1 | -1.1 | -2.3 | --- |
| 7_626 | gi_75832089  | NM_181012    | IDH1      | Isocitrate dehydrogenase 1 (nadp+), soluble                     | 0.02 | 2.0 | -1.1 | -2.3 | --- |
| 7_627 | gi_119895354 | XM_001255231 | OR2L3     | Olfactory receptor, family 2, subfamily l, member 3             | 0.01 | 2.1 | -1.1 | -2.3 | --- |
| 7_628 | gi_119887420 | XM_001254873 | NCKAP1    | Nck-associated protein 1                                        | 0.01 | 2.2 | -1.0 | -2.3 | --- |
| 7_629 | gi_119906534 | XM_612068    | PI15      | Peptidase inhibitor 15                                          | 0.01 | 2.1 | -1.0 | -2.2 | --- |
| 7_630 | gi_119892977 | XM_591626    | KLRC1     | Killer cell lectin-like receptor subfamily c, member 1          | 0.01 | 2.2 | 1.0  | -2.2 | --- |
| 7_631 | gi_90991697  | NM_001012285 | LEPR      | Leptin receptor                                                 | 0.03 | 2.0 | -1.1 | -2.2 | --- |
| 7_632 | gi_119914208 | XM_580659    | LOC538493 | Similar to chromosome 14 open reading frame 173                 | 0.00 | 2.2 | 1.0  | -2.2 | --- |
| 7_633 | gi_119922421 | XM_602604    | OlfR1134  | Olfactory receptor 1134                                         | 0.02 | 2.1 | -1.1 | -2.2 | --- |
| 7_634 | gi_31342589  | NM_174209    | UACA      | Uveal autoantigen with coiled-coil domains and ankyrin repeats  | 0.01 | 2.2 | 1.0  | -2.2 | --- |
| 7_635 | gi_119901594 | XM_600433    | PHACTR2   | Phosphatase and actin regulator 2                               | 0.01 | 2.2 | 1.0  | -2.2 | --- |

|       |              |              |           |                                                                  |      |     |      |      |     |
|-------|--------------|--------------|-----------|------------------------------------------------------------------|------|-----|------|------|-----|
| 7_636 | gi_119891943 | XM_001249912 | LRR1Q1    | Leucine-rich repeats and iq motif containing 1                   | 0.01 | 2.1 | -1.0 | -2.2 | --- |
| 7_637 | gi_119918958 | XM_583490    | LOC506960 | Similar to seven transmembrane helix receptor                    | 0.02 | 2.1 | 1.0  | -2.2 | --- |
| 7_638 | gi_119902535 | XM_613448    | PRTG      | Proteoglycan                                                     | 0.02 | 2.1 | -1.0 | -2.2 | --- |
| 7_639 | gi_119902733 | XM_617753    | LOC537580 | Hypothetical protein                                             | 0.02 | 2.1 | 1.0  | -2.2 | --- |
| 7_640 | gi_119921109 | XM_001253971 | LOC786219 | Similar to t-cell receptor alpha chain                           | 0.01 | 2.2 | 1.0  | -2.2 | --- |
| 7_641 | gi_119921057 | XM_001252809 | LOC784539 | Similar to olfactory receptor olfr598                            | 0.03 | 2.0 | -1.1 | -2.2 | --- |
| 7_642 | gi_119907383 | XM_610954    | LOC532436 | Similar to olfactory receptor mor31-7                            | 0.02 | 2.0 | -1.0 | -2.1 | --- |
| 7_643 | gi_157074135 | NM_001103310 | LOC789977 | Hypothetical protein                                             | 0.02 | 2.1 | 1.0  | -2.1 | --- |
| 7_644 | gi_119892713 | XR_028263    | LOC505479 | Similar to grp94 neighboring nucleotidase                        | 0.02 | 2.1 | 1.0  | -2.1 | --- |
| 7_645 | gi_76669664  | XM_864501    | OR6C75    | Olfactory receptor, family 6, subfamily c, member 75             | 0.02 | 2.1 | 1.0  | -2.1 | --- |
| 7_646 | gi_164420765 | NM_001113247 | CHN1      | Chimerin (chimaerin) 1                                           | 0.03 | 2.0 | -1.1 | -2.1 | --- |
| 7_647 | gi_148229657 | NM_181002    | AOC3      | Amine oxidase, copper containing 3 (vascular adhesion protein 1) | 0.02 | 2.0 | -1.0 | -2.1 | --- |
| 7_648 | gi_119919308 | XM_600752    | BATF2     | Basic leucine zipper transcription factor, atf-like 2            | 0.01 | 2.0 | 1.0  | -2.1 | --- |
| 7_649 | gi_119900577 | XM_617223    | LOC537068 | Similar to piwi-like 2 (drosophila)                              | 0.02 | 2.1 | 1.0  | -2.1 | --- |
| 7_650 | gi_77735964  | NM_001034509 | LOC515736 | Caspase-15                                                       | 0.02 | 2.0 | 1.0  | -2.1 | --- |

## Supplementary data table 8 Full list of genes in profile 8 (n = 98)

| Profile_ S. No | SEQ. ID      | Acc. No. (RefSeq) | Putative Gene symbol | Gene Name                                                                                     | BL20 LPS Vs BL20 FDR (4h/or18) | BL20 LPS Vs BL20 Abs: FC (4h/or18) | TBL20 Vs BL20 Abs: FC | TBL20 Vs BL20 Abs: FC (4h/or18) | BW720c Response |
|----------------|--------------|-------------------|----------------------|-----------------------------------------------------------------------------------------------|--------------------------------|------------------------------------|-----------------------|---------------------------------|-----------------|
| 8_1            | gi_116004314 | NM_001077046      | PLIN3                | Perilipin 3                                                                                   | 0.00                           | -9.5                               | 1.8                   | 17.2                            | ---             |
| 8_2            | gi_119920411 | XM_001252291      | BCOR                 | BCL6 corepressor                                                                              | 0.00                           | -21.0                              | -1.4                  | 15.2                            | ---             |
| 8_3            | gi_31340780  | NM_174669         | SERPINE2             | Serpin peptidase inhibitor, clade e (nexin, plasminogen activator inhibitor type 1), member 2 | 0.00                           | -9.2                               | 1.6                   | 15.0                            | ---             |
| 8_4            | gi_119892844 | XM_581489         | FGD4                 | Fyve, rhogef and ph domain containing 4                                                       | 0.00                           | -9.4                               | 1.6                   | 14.9                            | ---             |
| 8_5            | gi_116004122 | NM_001076954      | GOLGA7B              | Golgin a7 family, member b                                                                    | 0.00                           | -5.7                               | 1.9                   | 10.8                            | ---             |
| 8_6            | gi_115495426 | NM_001075876      | CAMKV                | Cam kinase-like vesicle-associated                                                            | 0.00                           | -15.7                              | -1.5                  | 10.6                            | ---             |
| 8_7            | gi_119913698 | XM_868029         | LOC616063            | Similar to myeloid-associated differentiation marker                                          | 0.00                           | -8.3                               | 1.2                   | 9.7                             | ---             |
| 8_8            | gi_156120776 | NM_001102065      | NID2                 | Nidogen 2 (osteonidogen)                                                                      | 0.00                           | -8.7                               | 1.0                   | 9.0                             | ---             |
| 8_9            | gi_119908995 | XM_602397         | SLC7A11              | Solute carrier family 7, member 11                                                            | 0.00                           | -9.3                               | -1.1                  | 8.8                             | ---             |
| 8_10           | gi_119888246 | XR_027752         | PLCL1                | Phospholipase c-like 1                                                                        | 0.00                           | -12.5                              | -1.4                  | 8.8                             | ---             |
| 8_11           | gi_119922570 | XM_001254638      | ARMCX6               | Armadillo repeat containing, x-linked 6                                                       | 0.00                           | -12.3                              | -1.5                  | 8.5                             | ---             |
| 8_12           | gi_119893809 | XM_613340         | RBM47                | Rna binding motif protein 47                                                                  | 0.00                           | -4.5                               | 1.8                   | 8.1                             | ---             |
| 8_13           | gi_148230339 | NM_174557         | IGFBP4               | Insulin-like growth factor binding protein 4                                                  | 0.00                           | -4.4                               | 1.8                   | 7.9                             | ---             |
| 8_14           | gi_31340894  | NM_174766         | TNS1                 | Tensin 1                                                                                      | 0.00                           | -10.8                              | -1.6                  | 6.6                             | ---             |
| 8_15           | gi_119908122 | XM_001252887      | RGS1                 | Regulator of g-protein signaling 1                                                            | 0.00                           | -5.6                               | 1.2                   | 6.6                             | ---             |
| 8_16           | gi_31341563  | NM_174601         | SLC1A5               | Solute carrier family 1 (neutral amino acid transporter), member 5                            | 0.00                           | -3.6                               | 1.8                   | 6.5                             | ---             |
| 8_17           | gi_78369387  | NM_001035353      | PLVAP                | Plasmalemma vesicle associated protein                                                        | 0.00                           | -4.3                               | 1.5                   | 6.5                             | ---             |
| 8_18           | gi_150247056 | NM_001099366      | SPRY1                | Sprouty homolog 1, antagonist of FGF signaling (drosophila)                                   | 0.00                           | -5.0                               | 1.3                   | 6.5                             | ---             |
| 8_19           | gi_154152126 | NM_001100354      | OLFML2B              | Olfactomedin-like 2b                                                                          | 0.00                           | -3.9                               | 1.6                   | 6.4                             | ---             |
| 8_20           | gi_156120814 | NM_001102084      | NELL2                | Nel-like 2 (chicken)                                                                          | 0.00                           | -4.9                               | 1.3                   | 6.4                             | ---             |
| 8_21           | gi_115497431 | NM_001075560      | NUDT16               | Nudix (nucleoside diphosphate linked moiety x)-type motif 16                                  | 0.00                           | -6.2                               | 1.0                   | 6.3                             | ---             |
| 8_22           | gi_119879733 | XM_614853         | ETV5                 | ETS variant 5                                                                                 | 0.00                           | -4.4                               | 1.4                   | 6.2                             | ---             |
| 8_23           | gi_156718123 | NM_001103097      | F2R                  | Coagulation factor ii (thrombin) receptor                                                     | 0.00                           | -4.8                               | 1.2                   | 6.0                             | ---             |
| 8_24           | gi_115494955 | NM_001075853      | PKD2                 | Pyruvate dehydrogenase kinase, isozyme 2                                                      | 0.00                           | -4.4                               | 1.3                   | 5.8                             | ---             |
| 8_25           | gi_157954058 | NM_001109806      | FCGR2B               | Fc fragment of igg, low affinity iib, receptor (CD32)                                         | 0.00                           | -5.1                               | 1.1                   | 5.4                             | ---             |
| 8_26           | gi_134085719 | NM_001083488      | FAM107A              | Family with sequence similarity 107, member a                                                 | 0.00                           | -2.9                               | 1.8                   | 5.2                             | ---             |
| 8_27           | gi_157074119 | NM_001103302      | LOC618633            | Similar to myeloid-associated differentiation marker                                          | 0.00                           | -2.8                               | 1.8                   | 5.1                             | ---             |
| 8_28           | gi_116004140 | NM_001076960      | ARMCX2               | Armadillo repeat containing, x-linked 2                                                       | 0.00                           | -3.5                               | 1.5                   | 5.1                             | ---             |
| 8_29           | gi_77736420  | NM_001034738      | LTB4R                | Leukotriene b4 receptor                                                                       | 0.00                           | -3.2                               | 1.6                   | 5.0                             | ---             |
| 8_30           | gi_31343314  | NM_173899         | CD5                  | CD5 molecule                                                                                  | 0.00                           | -4.9                               | 1.0                   | 4.8                             | ---             |
| 8_31           | gi_148237174 | NM_001098148      | KIAA1383             | KIAA1383                                                                                      | 0.00                           | -2.6                               | 1.8                   | 4.8                             | ---             |
| 8_32           | gi_119930243 | XM_585571         | PCSK4                | Proprotein convertase subtilisin/kexin type 4                                                 | 0.00                           | -2.9                               | 1.6                   | 4.7                             | ---             |
| 8_33           | gi_76657936  | XM_597134         | LGALS12              | Lectin, galactoside-binding, soluble, 12                                                      | 0.00                           | -5.5                               | -1.2                  | 4.6                             | ---             |
| 8_34           | gi_119906547 | XR_027912         | LOC535166            | Similar to sulfatase 1                                                                        | 0.00                           | -2.6                               | 1.7                   | 4.6                             | ---             |
| 8_35           | gi_119903494 | XM_595079         | EML6                 | Echinoderm microtubule associated protein like 6                                              | 0.00                           | -6.3                               | -1.4                  | 4.5                             | ---             |
| 8_36           | gi_150247133 | NM_001099371      | HPDL                 | 4-hydroxyphenylpyruvate dioxygenase-like                                                      | 0.00                           | -3.2                               | 1.4                   | 4.5                             | ---             |
| 8_37           | gi_119887452 | XM_874476         | GPR155               | G protein-coupled receptor 155                                                                | 0.00                           | -4.0                               | 1.1                   | 4.5                             | ---             |
| 8_38           | gi_119904602 | XM_582091         | STARD13              | Star-related lipid transfer (start) domain containing 13                                      | 0.00                           | -4.5                               | -1.0                  | 4.4                             | ---             |
| 8_39           | gi_114052243 | NM_001046358      | CMTM8                | Cklf-like marvel transmembrane domain containing 8                                            | 0.01                           | -2.1                               | 2.0                   | 4.2                             | ▼               |
| 8_40           | gi_31343172  | NM_173962         | SV2A                 | Synaptic vesicle glycoprotein 2a                                                              | 0.00                           | -5.5                               | -1.3                  | 4.2                             | ---             |
| 8_41           | gi_126158902 | NM_001081577      | SLC1A4               | Solute carrier family 1 (glutamate/neutral amino acid transporter), member 4                  | 0.00                           | -3.2                               | 1.3                   | 4.2                             | ---             |
| 8_42           | gi_119912114 | XM_614523         | NXP3                 | Neurexophilin 3                                                                               | 0.00                           | -3.3                               | 1.2                   | 4.1                             | ---             |
| 8_43           | gi_148238184 | NM_001098020      | TLE1                 | Transducin-like enhancer of split 1 (e(sp1) homolog, drosophila)                              | 0.00                           | -2.2                               | 1.9                   | 4.1                             | ---             |
| 8_44           | gi_119901706 | XM_596626         | SYNJ2                | Synaptojanin 2                                                                                | 0.01                           | -2.1                               | 1.9                   | 4.0                             | ---             |
| 8_45           | gi_156121146 | NM_001102251      | Jakmip1              | Janus kinase and microtubule interacting protein 1                                            | 0.00                           | -3.2                               | 1.2                   | 3.8                             | ---             |
| 8_46           | gi_119891341 | XM_868371         | PODXL                | Podocalyxin-like                                                                              | 0.00                           | -4.7                               | -1.3                  | 3.8                             | ---             |
| 8_47           | gi_149642966 | NM_001099031      | POC1B                | Poc1 centriolar protein homolog b (chlamydomonas)                                             | 0.00                           | -5.2                               | -1.4                  | 3.8                             | ---             |
| 8_48           | gi_156120560 | NM_001101956      | MGC152278            | Similar to myeloid-associated differentiation marker                                          | 0.00                           | -3.3                               | 1.1                   | 3.7                             | ---             |
| 8_49           | gi_119895490 | XM_601210         | HBEGF                | Heparin-binding egf-like growth factor                                                        | 0.00                           | -2.6                               | 1.4                   | 3.6                             | ---             |
| 8_50           | gi_119892809 | XM_615197         | CARD10               | Caspase recruitment domain family, member 10                                                  | 0.00                           | -4.2                               | -1.2                  | 3.6                             | ---             |
| 8_51           | gi_114051791 | NM_001045971      | SPINT2               | Serine peptidase inhibitor, kunitz type, 2                                                    | 0.00                           | -2.5                               | 1.4                   | 3.6                             | ---             |
| 8_52           | gi_114051388 | NM_001046175      | MAP1LC3A             | Microtubule-associated protein 1 light chain 3 alpha                                          | 0.01                           | -2.1                               | 1.7                   | 3.5                             | ---             |
| 8_53           | gi_119887600 | XM_615555         | GALNT3               | Udp-n-acetyl-alpha-d-galactosamine:polypeptide n-acetylgalactosaminyltransferase 3            | 0.01                           | -2.2                               | 1.6                   | 3.5                             | ---             |
| 8_54           | gi_119927446 | XM_868985         | LOC616864            | Similar to proton/amino acid transporter 4                                                    | 0.01                           | -2.1                               | 1.7                   | 3.5                             | ---             |

|      |              |              |            |                                                                                                             |      |      |      |     |     |
|------|--------------|--------------|------------|-------------------------------------------------------------------------------------------------------------|------|------|------|-----|-----|
| 8_55 | gi_119920662 | XM_586585    | FRMPD4     | Ferm and pdz domain containing 4                                                                            | 0.00 | -2.6 | 1.3  | 3.5 | --- |
| 8_56 | gi_114050922 | NM_001046448 | TSPAN14    | Tetraspanin 14                                                                                              | 0.00 | -2.9 | 1.2  | 3.5 | --- |
| 8_57 | gi_31342305  | NM_174331    | GRK5       | G protein-coupled receptor kinase 5                                                                         | 0.00 | -3.4 | 1.0  | 3.5 | --- |
| 8_58 | gi_62460585  | NM_001014947 | MAPK13     | Mitogen-activated protein kinase 13                                                                         | 0.00 | -4.5 | -1.3 | 3.4 | --- |
| 8_59 | gi_76665844  | XM_609088    | AADACL3    | Arylacетamide deacetylase-like 3                                                                            | 0.00 | -5.7 | -1.7 | 3.4 | --- |
| 8_60 | gi_115497717 | NM_001075593 | PLEKHA1    | Pleckstrin homology domain containing, family a (phosphoinositide binding specific) member 1                | 0.01 | -2.1 | 1.6  | 3.4 | --- |
| 8_61 | gi_116004188 | NM_001076984 | GLIPR1     | Gli pathogenesis-related 1                                                                                  | 0.00 | -4.3 | -1.3 | 3.4 | --- |
| 8_62 | gi_115495864 | NM_001075533 | ST6GALNAC2 | ST6 (alpha-n-acetylneuraminy-2,3-beta-galactosyl-1,3)-n-acetylgalactosaminide alpha-2,6-sialyltransferase 2 | 0.00 | -3.3 | 1.0  | 3.4 | --- |
| 8_63 | gi_115495270 | NM_001075169 | SORBS1     | Sorbin and sh3 domain containing 1                                                                          | 0.00 | -2.8 | 1.2  | 3.4 | --- |
| 8_64 | gi_126723520 | NM_001082439 | IGSF8      | Immunoglobulin superfamily, member 8                                                                        | 0.02 | -2.0 | 1.6  | 3.3 | --- |
| 8_65 | gi_31342040  | NM_174422    | PDE6H      | Phosphodiesterase 6h, cgmp-specific, cone, gamma                                                            | 0.01 | -2.2 | 1.5  | 3.2 | --- |
| 8_66 | gi_119929752 | XM_872864    | ARRB2      | Arrestin, beta 2                                                                                            | 0.00 | -3.4 | -1.1 | 3.2 | --- |
| 8_67 | gi_116686101 | NM_001077402 | FCGR3A     | Fc fragment of igg, low affinity iiiia, receptor (CD16A)                                                    | 0.00 | -2.7 | 1.2  | 3.2 | --- |
| 8_68 | gi_119930626 | XM_870478    | TLE2       | Transducin-like enhancer of split 2 (e(sp1) homolog, drosophila)                                            | 0.00 | -3.1 | 1.0  | 3.2 | --- |
| 8_69 | gi_31342110  | NM_174398    | NCALD      | Neurocalin delta                                                                                            | 0.00 | -3.1 | 1.0  | 3.2 | --- |
| 8_70 | gi_157785606 | NM_001105637 | MAF        | V-maf musculoaponeurotic fibrosarcoma oncogene homolog (avian)                                              | 0.00 | -2.4 | 1.3  | 3.1 | --- |
| 8_71 | gi_76611568  | XM_869196    | E2F2       | E2f transcription factor 2                                                                                  | 0.01 | -2.1 | 1.5  | 3.1 | --- |
| 8_72 | gi_115495180 | NM_001076537 | TRIM9      | Tripartite motif containing 9                                                                               | 0.00 | -3.2 | 1.0  | 3.1 | --- |
| 8_73 | gi_78365245  | NM_001035418 | ARHGEF9    | Cdc42 guanine nucleotide exchange factor (Gef) 9                                                            | 0.00 | -3.0 | 1.0  | 3.1 | --- |
| 8_74 | gi_156121042 | NM_001102198 | Slc19a3    | Solute carrier family 19 , member 3                                                                         | 0.01 | -2.1 | 1.5  | 3.1 | --- |
| 8_75 | gi_119909968 | XM_870732    | GPT2       | Glutamic pyruvate transaminase 2                                                                            | 0.00 | -2.8 | 1.1  | 3.0 | --- |
| 8_76 | gi_119909938 | XR_028750    | SPIRE2     | Spire homolog 2 (drosophila)                                                                                | 0.00 | -2.4 | 1.2  | 3.0 | --- |
| 8_77 | gi_115497811 | NM_001076453 | SLC19A1    | Solute carrier family 19 (folate transporter), member 1                                                     | 0.00 | -2.4 | 1.2  | 3.0 | --- |
| 8_78 | gi_154152082 | NM_001100341 | C1orf74    | Chromosome 1 open reading frame 74                                                                          | 0.00 | -4.4 | -1.5 | 3.0 | --- |
| 8_79 | gi_155371832 | NM_001101051 | MFNG       | Mfng o-fucosylpeptide 3-beta-n-acetylglucosaminyltransferase                                                | 0.00 | -3.1 | -1.1 | 2.9 | --- |
| 8_80 | gi_115496721 | NM_001075152 | TMC4       | Transmembrane channel-like 4                                                                                | 0.01 | -2.2 | 1.3  | 2.9 | --- |
| 8_81 | gi_123858767 | NM_001080366 | PJA1       | Praja ring finger 1                                                                                         | 0.00 | -2.7 | 1.1  | 2.9 | --- |
| 8_82 | gi_119911133 | XM_001256455 | C19orf51   | Chromosome 19 open reading frame 51                                                                         | 0.00 | -2.6 | 1.1  | 2.9 | --- |
| 8_83 | gi_156523107 | NM_001102498 | NKAPL      | NFkB activating protein-like                                                                                | 0.00 | -2.5 | 1.1  | 2.9 | --- |
| 8_84 | gi_41386781  | NM_174231    | ADRB2      | Adrenergic, beta-2-, receptor, surface                                                                      | 0.00 | -2.5 | 1.1  | 2.8 | --- |
| 8_85 | gi_119915572 | XM_588389    | ZKSCAN4    | Similar to zinc finger protein 307, transcript variant 1                                                    | 0.00 | -3.2 | -1.1 | 2.8 | --- |
| 8_86 | gi_119912967 | XM_596546    | SH3PXD2B   | Sh3 and px domains 2b                                                                                       | 0.00 | -2.8 | 1.0  | 2.8 | --- |
| 8_87 | gi_164420752 | NM_001113245 | TRAF3IP3   | TRAF3 interacting protein 3                                                                                 | 0.00 | -4.6 | -1.7 | 2.8 | --- |
| 8_88 | gi_94966796  | NM_001040496 | ART3       | Adp-ribosyltransferase 3                                                                                    | 0.01 | -2.1 | 1.3  | 2.8 | --- |
| 8_89 | gi_119896289 | XM_867351    | KIAA1797   | Kiaa1797                                                                                                    | 0.00 | -2.4 | 1.1  | 2.7 | --- |
| 8_90 | gi_119914579 | XM_001250879 | ARHGEF3    | Rho guanine nucleotide exchange factor (GEF) 3                                                              | 0.00 | -4.7 | -1.8 | 2.6 | --- |
| 8_91 | gi_119912784 | XM_001253301 | MXRA7      | Matrix-remodelling associated 7                                                                             | 0.00 | -2.2 | 1.2  | 2.6 | --- |
| 8_92 | gi_115496251 | NM_001075741 | GPRC5B     | G protein-coupled receptor, family c, group 5, member b                                                     | 0.00 | -2.4 | 1.0  | 2.5 | --- |
| 8_93 | gi_56710322  | NM_001008664 | TLR3       | Toll-like receptor 3                                                                                        | 0.00 | -4.8 | -2.0 | 2.4 | --- |
| 8_94 | gi_118150831 | NM_001077858 | CTPS       | Ctp synthase                                                                                                | 0.00 | -2.2 | 1.1  | 2.4 | --- |
| 8_95 | gi_119887519 | XM_607085    | PK1        | Pyruvate dehydrogenase kinase, isozyme 1                                                                    | 0.01 | -2.1 | 1.1  | 2.4 | --- |
| 8_96 | gi_78042497  | NM_001035017 | PHGDH      | Phosphoglycerate dehydrogenase                                                                              | 0.00 | -2.3 | 1.0  | 2.3 | --- |
| 8_97 | gi_119918586 | XM_586457    | FUT11      | Fucosyltransferase 11 (alpha (1,3) fucosyltransferase)                                                      | 0.01 | -2.0 | 1.1  | 2.2 | --- |
| 8_98 | gi_157954050 | NM_001109796 | CARD11     | Caspase recruitment domain family, member 11                                                                | 0.01 | -2.0 | 1.0  | 2.1 | --- |

Supplementary data table 9: Details of primers used for semi-quantitative RT-PCR and real-time quantitative RT-PCR

| Gene symbol | GenBank accession number     | F / R | Primer sequences (5' → 3')  | Len. (bp) | Amp. length (bp) | T <sub>m</sub> (°C) | Gene name                                                     |
|-------------|------------------------------|-------|-----------------------------|-----------|------------------|---------------------|---------------------------------------------------------------|
| ACTB        | <a href="#">NM_173979</a>    | F     | CTCTCTCCAGCCTTCCTTCTGG      | 24        | 240              | 58.21               | ACTB actin, beta                                              |
|             |                              | R     | ACACGGAGTACTTGCGCTCAGG      | 22        |                  | 58.92               |                                                               |
| ANGPT4      | <a href="#">NM_001076483</a> | F     | ACAATGACAACCTGCCTCTGCAAGTGC | 26        | 214              | 60.39               | Angiotensin 4                                                 |
|             |                              | R     | GCTGCCCCCTTAGATGCCCGAG      | 21        |                  | 59.31               |                                                               |
| AQP3        | <a href="#">NM_001079794</a> | F     | TACCCCTCTGGACACTTGACATGG    | 25        | 242              | 59.42               | Aquaporin 3 (Gill blood group)                                |
|             |                              | R     | CCGGCGATGGCGGTGAAAAGG       | 21        |                  | 60.96               |                                                               |
| BCL9        | <a href="#">XR_028680</a>    | F     | TACCCCTAAAGCACTCCCTGGCC     | 23        | 214              | 59.67               | B-cell CLL/lymphoma 9                                         |
|             |                              | R     | CGAGTGTGGTGTGTGCTGGGAATC    | 24        |                  | 60                  |                                                               |
| BCOR        | <a href="#">NM_001191544</a> | F     | AGGTGTGCAAATTCAGCCCCACTG    | 24        | 244              | 59.88               | Similar to BCL-6 corepressor                                  |
|             |                              | R     | ATGTCTGGGGTGACCTGGTCGG      | 22        |                  | 59.92               |                                                               |
| BIRC3       | <a href="#">NM_001035293</a> | F     | GGATGATGCTATGTGAGAACCCTGAG  | 27        | 255              | 57.24               | Baculoviral IAP repeat-containing 3                           |
|             |                              | R     | TCCCAACACCTCAGTCCACCATC     | 23        |                  | 58                  |                                                               |
| BOLA-DYA    | <a href="#">NM_001012678</a> | F     | CTTGGGTGCTGCCTCCAGACGT      | 22        | 248              | 61.01               | BOLA-DYA major histocompatibility complex, class II, DY alpha |
|             |                              | R     | TGGAAGGAGCTCTGTGATGAAGTGG   | 25        |                  | 58.23               |                                                               |
| CALD1       | <a href="#">NM_174258</a>    | F     | CCTACCAGCGGAATGACGATGACG    | 24        | 230              | 59.49               | Caldesmon 1                                                   |
|             |                              | R     | CCGAGCCAGTCGCTCCAGG         | 19        |                  | 59.17               |                                                               |
| CCL4        | <a href="#">NM_001075147</a> | F     | CCTTCTGTTCTCCAGCGCTCTCAG    | 24        | 192              | 59.08               | Chemokine (C-C motif) ligand 4                                |
|             |                              | R     | GCTCACTGGGGTTGGCGCAG        | 20        |                  | 60.59               |                                                               |
| CCL3        | <a href="#">NM_174511</a>    | F     | AGCAAGCACCGAGTCCACCTC       | 22        | 244              | 60.75               | chemokine (C-C motif) ligand 3                                |
|             |                              | R     | CTTGAGCACTGGCTGCTGGTC       | 22        |                  | 59.99               |                                                               |
| CD36        | <a href="#">NM_174010</a>    | F     | TGTGCAGAAATCCAGATGAAGTGACAG | 26        | 225              | 57.18               | CD36 molecule (thrombospondin receptor)                       |
|             |                              | R     | GCTGCTACAGCCAGTTGAGAATG     | 24        |                  | 58.08               |                                                               |
| CD69        | <a href="#">NM_174014</a>    | F     | ACTGTAGGTTGGCTCCACGTGG      | 22        | 288              | 58.51               | CD69 molecule                                                 |
|             |                              | R     | TGGTGGCGTGATGATGCATATTG     | 24        |                  | 58.19               |                                                               |
| CFLAR       | <a href="#">NM_001012281</a> | F     | CTGTCTTCTGTGAGCTTGCTGAGC    | 25        | 237              | 59.78               | CASP8 and FADD-like apoptosis regulator                       |
|             |                              | R     | ATCCTTGCTATCTTGCTTCGACCCG   | 26        |                  | 60.61               |                                                               |
| CLU         | <a href="#">NM_173902</a>    | F     | CTCCAGTCTACCAGCAGAAGATGC    | 25        | 279              | 58.65               | Clusterin                                                     |
|             |                              | R     | CAGTGCTTTCTCTGCCACATTCTCC   | 25        |                  | 58.1                |                                                               |
| CTTN        | <a href="#">NM_001075287</a> | F     | TTGTGAGCGTCTCGCATCTGCACG    | 24        | 224              | 62.04               | CTTN cortactin                                                |
|             |                              | R     | AACACATTCTCCCGCAGCTTGTGG    | 24        |                  | 59.94               |                                                               |
| CXCL10      | <a href="#">NM_001046551</a> | F     | TGCAAGTCAATCCTGCCACGTG      | 23        | 203              | 59.93               | CXCL10 chemokine (C-X-C motif) ligand 10                      |
|             |                              | R     | GAGGTAGCTTCTCTGTGTCATCC     | 25        |                  | 57.67               |                                                               |
| CX3CR1      | <a href="#">NM_001102558</a> | F     | AGGAAGACTGACGGGCACATCG      | 22        | 243              | 58.66               | CX3CR1 chemokine (C-X3-C motif) receptor 1                    |
|             |                              | R     | TTGATGAGGGCAAACACCACGAGC    | 24        |                  | 59.88               |                                                               |
| CYP4F3      | <a href="#">NM_001046391</a> | F     | AGCACTCGTCTGGACATGTTGAAC    | 25        | 202              | 57.77               | Cytochrome P450, family 4, subfamily F, polypeptide 3         |
|             |                              | R     | CATCGCGGGTGAGGTAGTACAGG     | 23        |                  | 58.61               |                                                               |
| DTX4        | <a href="#">XM_606934</a>    | F     | GCAGTGTCCGACCTGTAAGACC      | 22        | 216              | 57.03               | Deltex homolog 4                                              |
|             |                              | R     | AGGTAACAATGTGAGGGAAGCCAC    | 25        |                  | 58.76               |                                                               |
| ICAM1       | <a href="#">NM_174348</a>    | F     | TGGCCCTGCTCGGACTCTG         | 20        | 191              | 60.25               | ICAM1 intercellular adhesion molecule 1                       |
|             |                              | R     | AACCTTCCAGTTGTCCACCGG       | 22        |                  | 58.69               |                                                               |
| IFIT3       | <a href="#">NM_001075414</a> | F     | GGCAGGCAAACAGCCATCATGAG     | 23        | 239              | 58.78               | Interferon-induced                                            |

|        |                              |   |                                |    |     |       |                                                                              |
|--------|------------------------------|---|--------------------------------|----|-----|-------|------------------------------------------------------------------------------|
|        |                              | R | CGCAAGCATTCCAGGGCTGC           | 20 |     | 59.22 | protein with tetratricopeptide repeats 3                                     |
| IGJ    | <a href="#">NM_175773</a>    | F | TCCTAGTCAAGACATTGTGGAGAG       | 24 | 227 | 53.57 | immunoglobulin J chain                                                       |
|        |                              | R | TGTCATAGGTGTAACAGGTCTCAG       | 24 |     | 53.58 |                                                                              |
| IL2RB  | <a href="#">XM_587301</a>    | F | ACTCACTCCAGGTCTGCCGATAG        | 24 | 217 | 59.82 | IL2RB interleukin 2 receptor, beta                                           |
|        |                              | R | ACCTGAAGCTCATATCCGTGCCTG       | 25 |     | 58.87 |                                                                              |
| IL15   | <a href="#">NM_174090</a>    | F | GAGAAGTACTTCCATCCAGTGCTAC      | 25 | 255 | 54.76 | Interleukin 15                                                               |
|        |                              | R | AGGAGAAAGCACTGCATCGCTG         | 22 |     | 57.59 |                                                                              |
| IL18   | <a href="#">NM_174091</a>    | F | GGAATCAGATCACTTTGGCAAACCTGAACC | 30 | 202 | 58.99 | Interleukin 18                                                               |
|        |                              | R | GATGGTTACGGCCAGACCTCTAGTG      | 25 |     | 58.43 |                                                                              |
| ISG15  | <a href="#">NM_174366</a>    | F | TGCAGAGAGCCTGGCACCAGAAC        | 23 | 268 | 60.97 | ISG15 ubiquitin-like modifier                                                |
|        |                              | R | GATGCAGTTCTGCACCACCAGC         | 22 |     | 58.67 |                                                                              |
| LMO2   | <a href="#">NM_001076352</a> | F | CTACTACAAGCTGGGCCGGAAGC        | 23 | 217 | 59.33 | LIM domain only 2 (rhombotin-like 1)                                         |
|        |                              | R | CACGATGTCGGAGTTGATGAGGAGG      | 25 |     | 58.95 |                                                                              |
| MFAP2  | <a href="#">NM_174388</a>    | F | CCGCGTCTACGTCGTAATAAGG         | 23 | 169 | 57.71 | Microfibrillar-associated protein 2                                          |
|        |                              | R | GCAGCCCCACAGCTCCTG             | 19 |     | 59.67 |                                                                              |
| MEIS3  | <a href="#">NM_001193152</a> | F | CGCTGCTAGCCCTGGTCTTTGAG        | 23 | 232 | 59.57 | MEIS3 similar to Meis1, myeloid ecotropic viral integration site 1 homolog 3 |
|        |                              | R | AGGTGGAAGCGGAGCACTTGAATG       | 24 |     | 59.47 |                                                                              |
| MMP13  | <a href="#">NM_174389</a>    | F | TGGTGACTTCTACCCATTTGATGG       | 24 | 275 | 54.56 | MMP13 matrix metalloproteinase 13 (collagenase 3)                            |
|        |                              | R | ACTGAATCCCTTGGACATCATCATC      | 25 |     | 54.66 |                                                                              |
| MPEG1  | <a href="#">NM_001046464</a> | F | AAGGATCAAGCTGTAACCTCCAGG       | 25 | 243 | 56.03 | Macrophage expressed gene 1                                                  |
|        |                              | R | CCTGATGTGGTCTCTGAATGAG         | 24 |     | 56.5  |                                                                              |
| MX2    | <a href="#">NM_173941</a>    | F | CAAGAGGCACACTCAGACTTCCACT      | 25 | 256 | 58.42 | MX2 myxovirus (influenza virus) resistance 2 (mouse)                         |
|        |                              | R | CCGCACCTTCTCCTCATACTTTCTG      | 25 |     | 57.2  |                                                                              |
| MYL4   | <a href="#">NM_001075149</a> | F | ATGCCGAGGTGCTGCGTGCC           | 21 | 208 | 62.01 | Myosin, light chain 4, alkali;                                               |
|        |                              | R | GCAAGGACGTGGCGAAGCTCAG         | 22 |     | 60.61 |                                                                              |
| NDRG1  | <a href="#">NM_001035009</a> | F | AGCAGGACATTGAGACTTTGCATGGC     | 26 | 222 | 60.01 | N-myc downstream regulated 1                                                 |
|        |                              | R | TGGGGAAGGACGCAGCGCC            | 19 |     | 61.85 |                                                                              |
| NID2   | <a href="#">NM_001102065</a> | F | CACTCCCACCCACGCCCTTCTG         | 22 | 261 | 59.67 | Nidogen 2 (osteonidogen)                                                     |
|        |                              | R | CTATTCAGGTCATCAACCTCTCCTCGG    | 27 |     | 58.12 |                                                                              |
| PAK1   | <a href="#">NM_001076898</a> | F | CGACAGAAACCGCAGGCAGAGATG       | 24 | 249 | 60.12 | p21 protein (Cdc42/Rac)-activated kinase 1                                   |
|        |                              | R | CAGGTAAGATGGCTCGGTAATCGG       | 26 |     | 57.64 |                                                                              |
| PGM5   | <a href="#">NM_001102335</a> | F | TGCCCAACTTCACTCCAGAGCGTGC      | 24 | 295 | 61.75 | Phosphoglucomutase 5                                                         |
|        |                              | R | GCAACATTAACTTCACTCCAACTCTCC    | 29 |     | 57.07 |                                                                              |
| PIK3R6 | <a href="#">NM_001102028</a> | F | ACTCTAATGTACGTGCTACTAAGGC      | 26 | 205 | 56.6  | phosphoinositide-3-kinase, regulatory subunit 6                              |
|        |                              | R | CACTCGTCAGGTTCTGCTCGG          | 21 |     | 57.25 |                                                                              |
| RGS1   | <a href="#">NM_001199063</a> | F | GTGAGGAGAATATTGAGTTCTGGCTGG    | 27 | 321 | 57.18 | Similar to regulator of G-protein signalling 1,                              |
|        |                              | R | AGCCAGGAGCCAGTCACTTTAGAC       | 24 |     | 58.16 |                                                                              |
| RNASEL | <a href="#">NM_001098165</a> | F | GACTGAGGACGAGGCATCTACG         | 22 | 243 | 56.42 | Ribonuclease L                                                               |
|        |                              | R | GGTTGTTATGGCTCTCAGTCTCC        | 24 |     | 56.75 |                                                                              |
| Runx-2 | <a href="#">XM_002684501</a> | F | GACAGAAGCTTGATGACTTAAACCTAG    | 28 | 224 | 55.33 | Runt-related transcription factor 2                                          |
|        |                              | R | CGAGGGATAGGACTGGTCATAGG        | 23 |     | 55.17 |                                                                              |
| RYK    | <a href="#">XM_001249766</a> | F | CCAGACACCCTACGTGGACATCG        | 23 | 238 | 58.79 | Similar to receptor-like tyrosine kinase                                     |
|        |                              | R | TCCTGACGCTGTGAGACTGTGAC        | 23 |     | 58.36 |                                                                              |
| SELL   | <a href="#">NM_174182</a>    | F | ATGCAGCGGCCATGGACAATGTG        | 23 | 211 | 60.6  | SELL selectin L                                                              |
|        |                              | R | AATCATGTCTGTCCCTTGAGCAG        | 25 |     | 57.03 |                                                                              |
| SLC6A6 | <a href="#">NM_174610</a>    | F | CGTACCCTGACCTACAACAAAGTCTAC    | 28 | 266 | 58.51 | Solute carrier family                                                        |



|       |                              |   |                           |    |     |       |                                                     |
|-------|------------------------------|---|---------------------------|----|-----|-------|-----------------------------------------------------|
|       |                              | R | CAATGATGTGCGTGGGTTTCCTGAG | 25 |     | 58.62 | 6 (neurotransmitter transporter, taurine), member 6 |
| STAP1 | <a href="#">NM_001077868</a> | F | ACTGCTCTACCCTTGTACTTTGAAG | 25 | 177 | 54.53 | Signal transducing adaptor family member 1          |
|       |                              | R | CTGATCAGTAAGGCATGTAAGGTC  | 24 |     | 53.07 |                                                     |
| TLR4  | <a href="#">NM_174198</a>    | F | TGGACCTGAGCTTTAACTACCTG   | 23 | 159 | 59.39 | TLR4 toll-like receptor 4                           |
|       |                              | R | TTCCCGTCAGTATCAAGGTG      | 20 |     | 58.8  |                                                     |
| VCAM1 | <a href="#">NM_174484</a>    | F | CAGGCACCTTCAGGAGGGACAG    | 22 | 226 | 58.57 | Vascular cell adhesion molecule 1                   |
|       |                              | R | CAGCCTGTTGTGCTGCAAGTCAGTG | 25 |     | 60.89 |                                                     |
| XCL1  | <a href="#">NM_175716</a>    | F | TCAGCCTCTTACTGCACAGCTCAG  | 24 | 264 | 58.48 | XCL1 chemokine (C motif) ligand 1                   |
|       |                              | R | CAGGCAGCTTGAGGATCAGCACAG  | 24 |     | 59.83 |                                                     |

---
